# Supplementary material for: Synthesis and biological evaluation of oleanolic acid derivative–chalcone conjugates as α-glucosidase inhibitors
Source: Royal Society of Chemistry journal article supplement (doi:10.1039/c3ra46492j), 2014-01-01
Supplement: c3ra46492j.pdf [file c3ra46492j.pdf]

# Synthesis and Biological Evaluation of Conjugates of Oleanolic Acid Derivatives-Chalcones as $\alpha$ -Glucosidase Inhibitors

Chu Tang <sup>a†</sup>, Linhui Zhu <sup>a†</sup>, Yu Chen <sup>b</sup>, Rui Qin <sup>c</sup>, Zhi-Nan Mei <sup>a</sup>, Jing Xu <sup>a,\*</sup>,  
Guangzhong Yang <sup>a,\*</sup>

<sup>a</sup> *Laboratory for Natural Product Chemistry, College of Pharmacy, South Central University for Nationalities, 708 Minyuan Road, Wuhan 430074, P. R. China*

<sup>b</sup> *College of Chemistry and Material Sciences, South Central University for Nationalities, 708 Minyuan Road, Wuhan 430074, P. R. China*

<sup>c</sup> *College of Life Sciences, South Central University for Nationalities, 708 Minyuan Road, Wuhan 430074, P. R. China*

## Content

1. **Figure 1.** Spectra of compound **1a** p3-5
2. **Figure 2.** Spectra of compound **1b** p6-8
3. **Figure 3.** Spectra of compound **1c** p9-10
4. **Figure 4.** Spectra of compound **1d** p11-13
5. **Figure 5.** Spectra of compound **1e** p14-16
6. **Figure 6.** Spectra of compound **2a** p17-19
7. **Figure 7.** Spectra of compound **2b** p20-22
8. **Figure 8.** Spectra of compound **3a** p23-24
9. **Figure 9.** Spectra of compound **3b** p25-26
10. **Figure 10.** Spectra of compound **3c** p27-28
11. **Figure 11.** Spectra of compound **3d** p29-30
12. **Figure 12.** Spectra of compound **3e** p31-32
13. **Figure 13.** Spectra of compound **4a** p33-34
14. **Figure 14.** Spectra of compound **4b** p35-36
15. **Figure 15.** Spectra of compound **4c** p37-38

- 16. Figure 16.** Spectra of compound **4d** **p39-40**
- 17. Figure 17.** Spectra of compound **4e** **p41-42**
- 18. Figure 18.** Spectra of compound **4f** **p43-44**
- 19. Figure 19.** Spectra of compound **5a** **p45-46**
- 20. Figure 20.** Spectra of compound **5b** **p47-48**
- 21. Figure 21.** Spectra of compound **5c** **p49-50**
- 22. Figure 22.** Spectra of compound **5d** **p51-52**
- 23. Figure 23.** Spectra of compound **5e** **p53-54**
- 24. Figure 24.** Spectra of compound **6a** **p55-56**
- 25. Figure 25.** Spectra of compound **6b** **p57-58**
- 26. Figure 26.** Spectra of compound **6c** **p59-60**

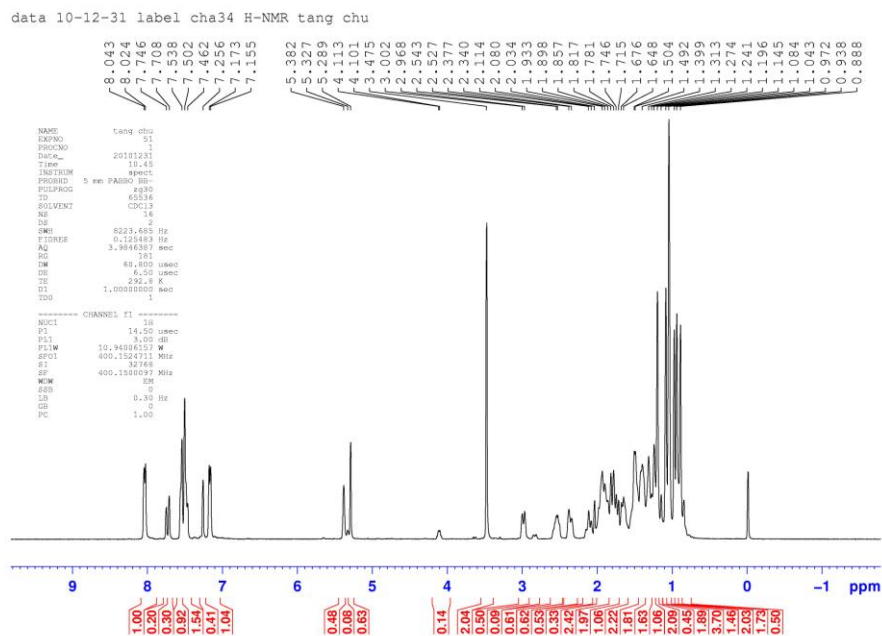

<sup>1</sup>H NMR spectrum of compound **1a**

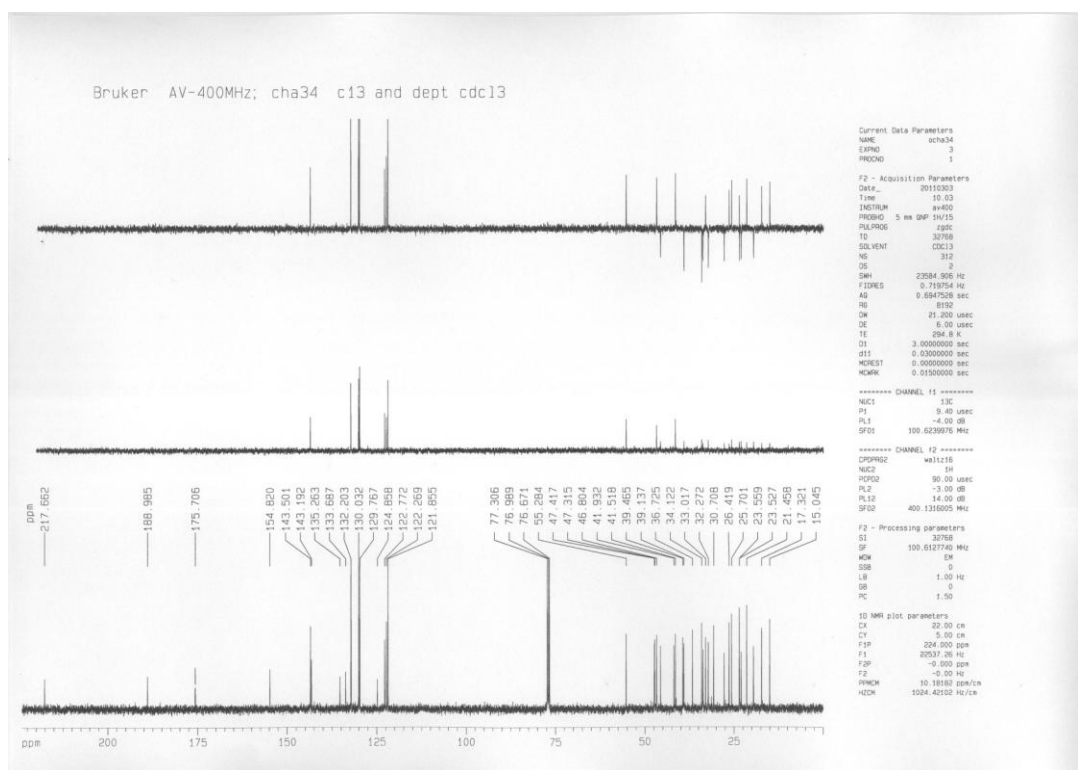

<sup>13</sup>C NMR spectrum of compound **1a**

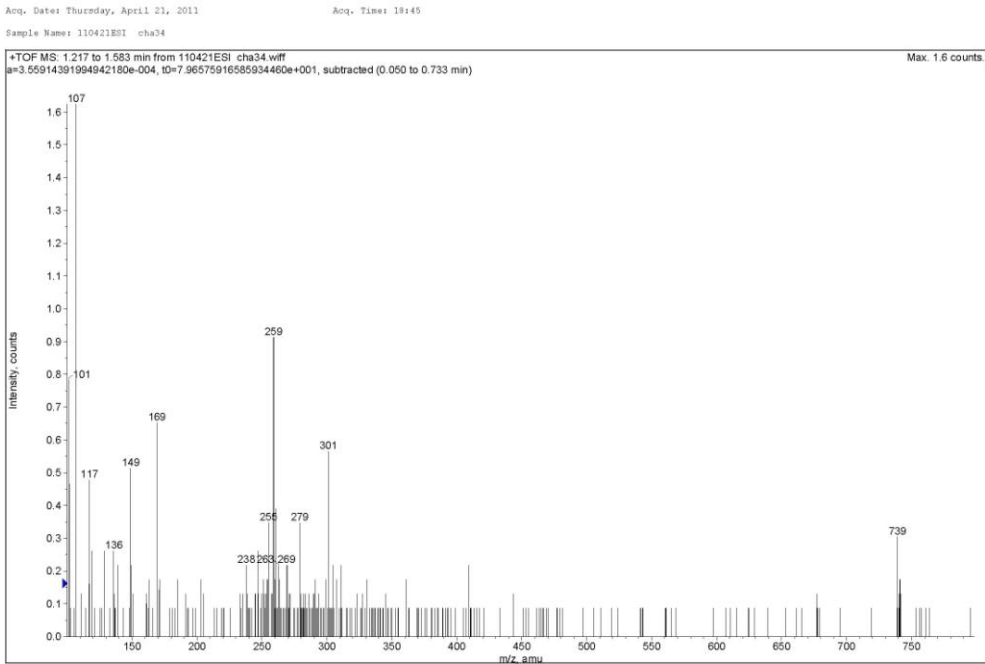

ESI-MS spectrum of compound **1a**

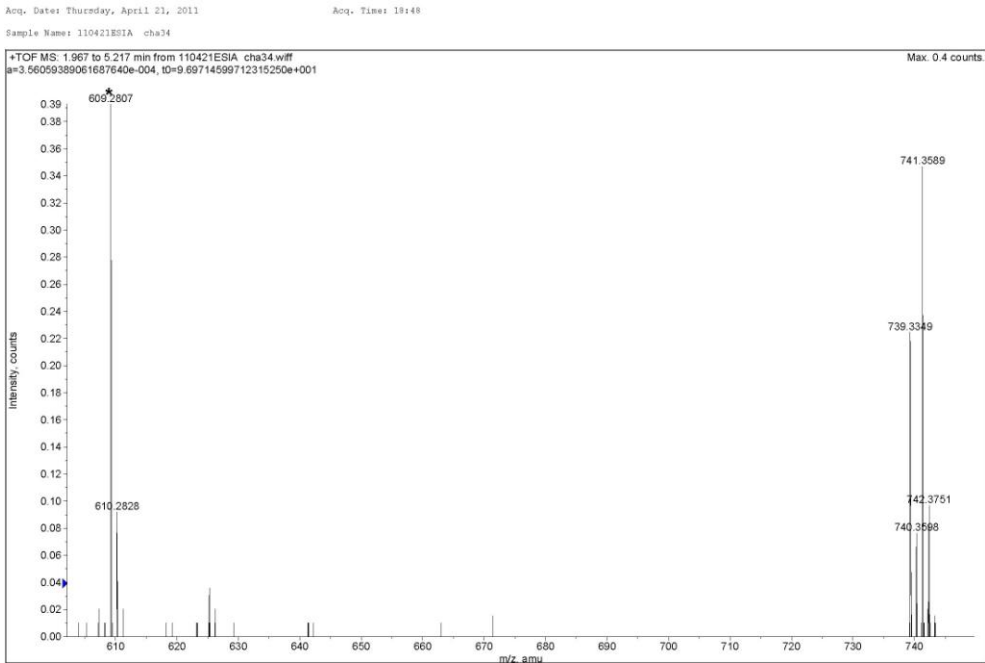

Acq. Date: Thursday, April 21, 2011  
Sample Name: 110421ESIA cha34

Acq. Time: 18:48

| Elemental composition calculator |                       |          |          |
|----------------------------------|-----------------------|----------|----------|
| Target m/z:                      | +739.3349             | amu      |          |
| Tolerance:                       | +10.0000              | ppm      |          |
| Result type:                     | Elemental             |          |          |
| Max num of results:              | 1000                  |          |          |
| Min DBE:                         | -10.0000              | Max DBE: | +60.0000 |
| Electron state:                  | OddAndEven            |          |          |
| Num of charges:                  | 0                     |          |          |
| Add water:                       | N/A                   |          |          |
| Add proton:                      | N/A                   |          |          |
| File Name:                       | 110421ESIA cha34.wiff |          |          |

|    | Elements | Min Number | Max Number |
|----|----------|------------|------------|
| 1  | Br       | 1          | 1          |
| 2  | C        | 0          | 200        |
| 3  | Cl       | 0          | 0          |
| 4  | F        | 0          | 0          |
| 5  | H        | 0          | 400        |
| 6  | K        | 0          | 0          |
| 7  | N        | 0          | 0          |
| 8  | Na       | 0          | 0          |
| 9  | O        | 2          | 5          |
| 10 | P        | 0          | 0          |
| 11 | Pt       | 0          | 0          |

Acq. Date: Thursday, April 21, 2011  
Sample Name: 110421ESIA cha34

Acq. Time: 18:48

|    | Elements | Min Number | Max Number |
|----|----------|------------|------------|
| 12 | S        | 0          | 0          |
| 13 | Si       | 0          | 0          |

|   | Formula       | Calculated m/z (amu) | mDa Error | PPM Error | DBE  |
|---|---------------|----------------------|-----------|-----------|------|
| 1 | C45 H56 O4 Br | 739.3361             | -1.2969   | -1.7541   | 17.5 |

HRESIMS spectrum of compound **1a**

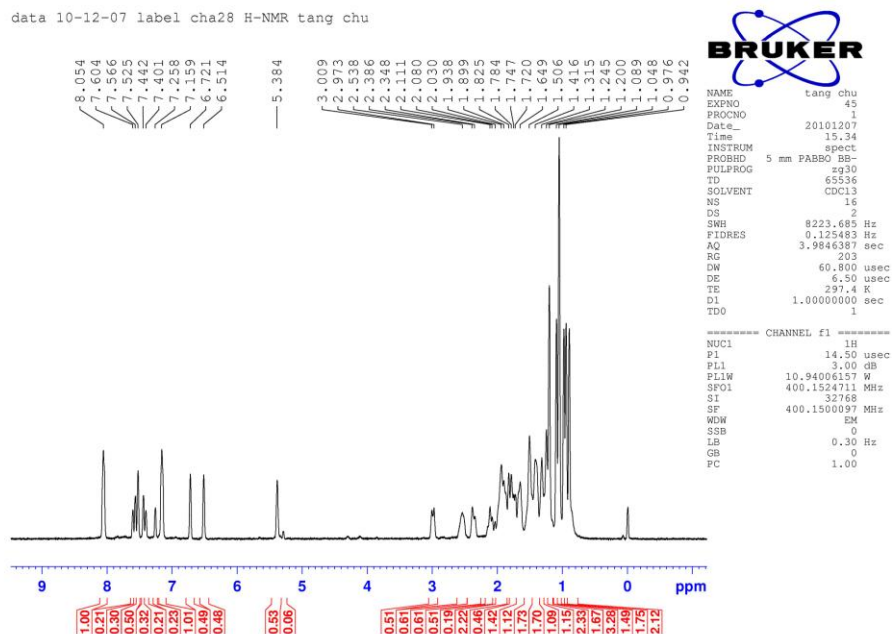

$^1\text{H}$  NMR spectrum of compound **1b**

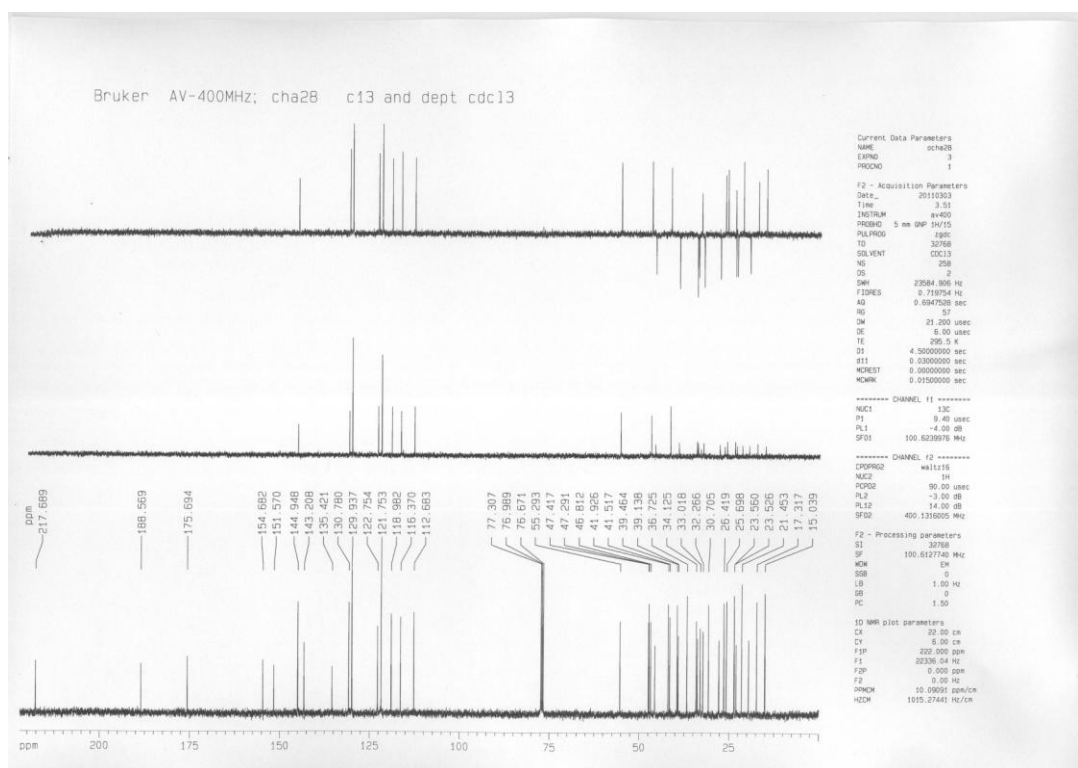

$^{13}\text{C}$  NMR spectrum of compound **1b**

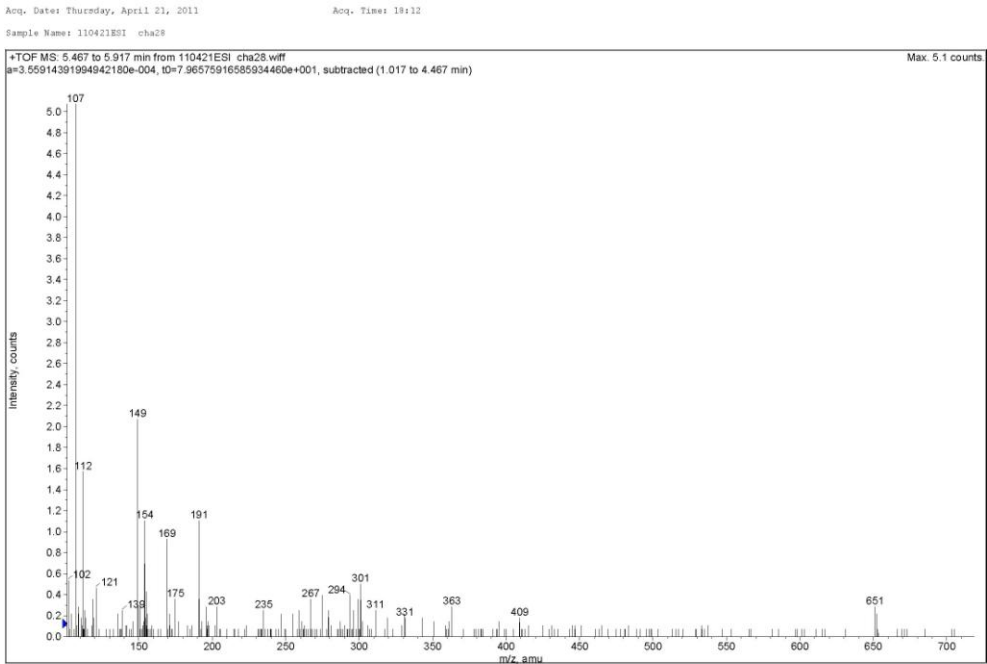

ESI-MS spectrum of compound **1b**

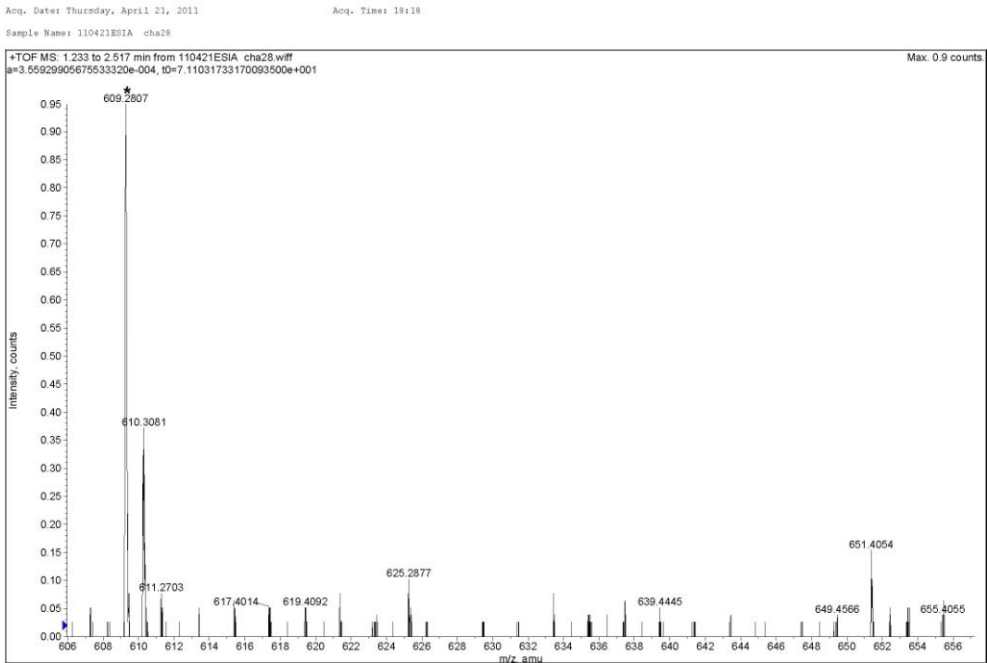

Acq. Date: Thursday, April 21, 2011  
Sample Name: 110421ESIA cha28

Acq. Time: 18:18

| Elemental composition calculator |                       |            |            |
|----------------------------------|-----------------------|------------|------------|
| Target m/z:                      | +651.4054             | amu        |            |
| Tolerance:                       | +10.0000              | ppm        |            |
| Result type:                     | Elemental             |            |            |
| Max num of results:              | 1000                  |            |            |
| Min DBE:                         | -10.0000              | Max DBE:   | +60.0000   |
| Electron state:                  | OddAndEven            |            |            |
| Num of charges:                  | 0                     |            |            |
| Add water:                       | N/A                   |            |            |
| Add proton:                      | N/A                   |            |            |
| File Name:                       | 110421ESIA cha28.wiff |            |            |
|                                  | Elements              | Min Number | Max Number |
| 1                                | Br                    | 0          | 0          |
| 2                                | C                     | 0          | 200        |
| 3                                | Cl                    | 0          | 0          |
| 4                                | F                     | 0          | 0          |
| 5                                | H                     | 0          | 400        |
| 6                                | K                     | 0          | 0          |
| 7                                | N                     | 0          | 0          |
| 8                                | Na                    | 0          | 0          |
| 9                                | O                     | 2          | 5          |
| 10                               | P                     | 0          | 0          |
| 11                               | Pt                    | 0          | 0          |

Acq. Date: Thursday, April 21, 2011  
Sample Name: 110421ESIA cha28

Acq. Time: 18:18

|    | Elements | Min Number | Max Number |
|----|----------|------------|------------|
| 12 | S        | 0          | 0          |
| 13 | Si       | 0          | 0          |

|   | Formula    | Calculated m/z (amu) | mDa Error | PPM Error | DBE  |
|---|------------|----------------------|-----------|-----------|------|
| 1 | C43 H55 O5 | 651.4049             | 0.4496    | 0.6901    | 16.5 |

HRESIMS spectrum of compound **1b**



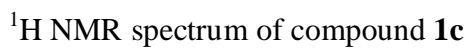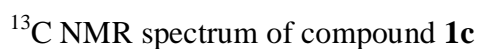

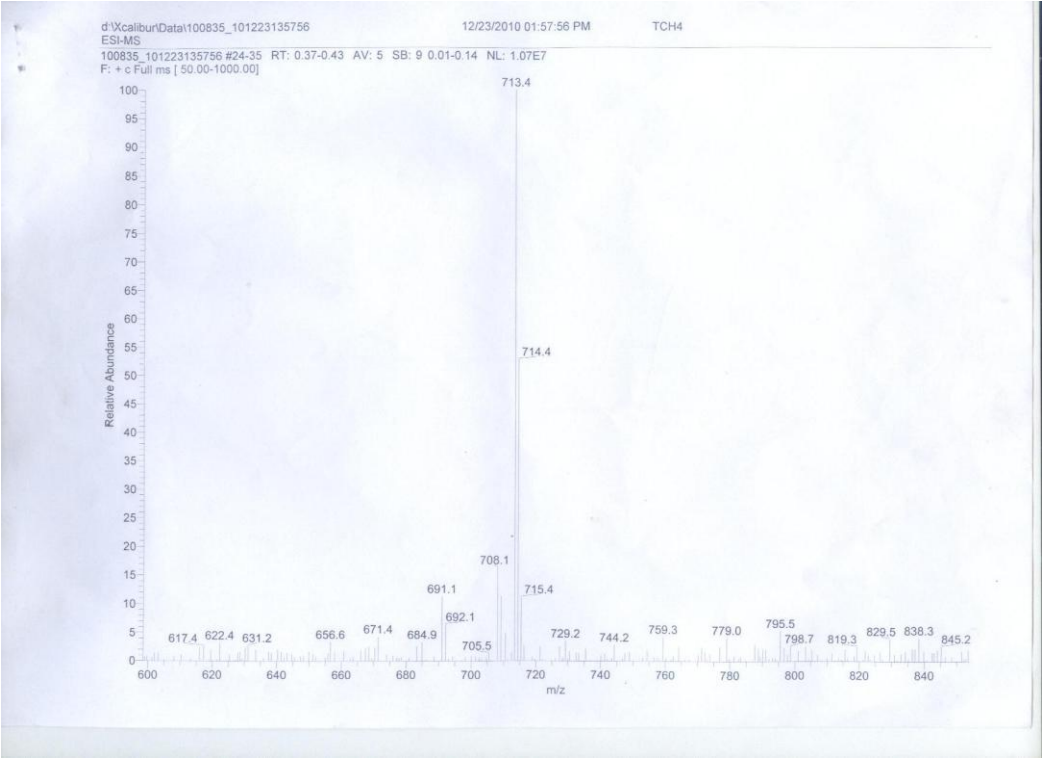

ESI-MS spectrum of compound 1c

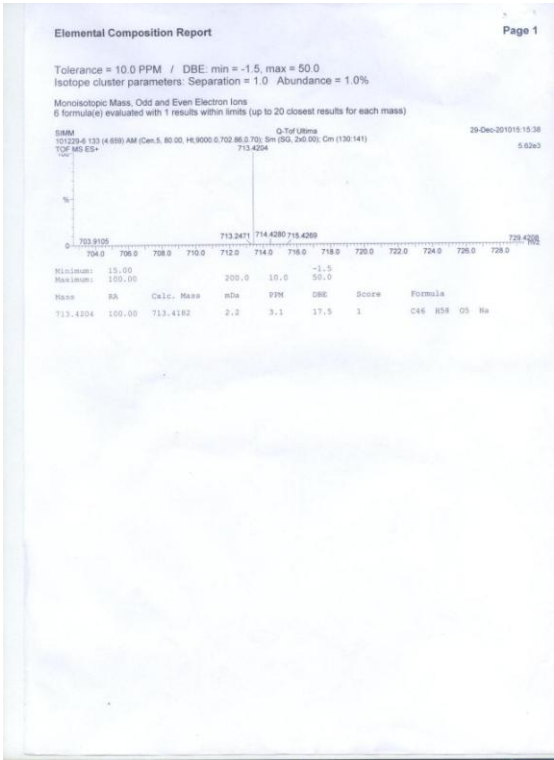

HRESIMS spectrum of compound 1c

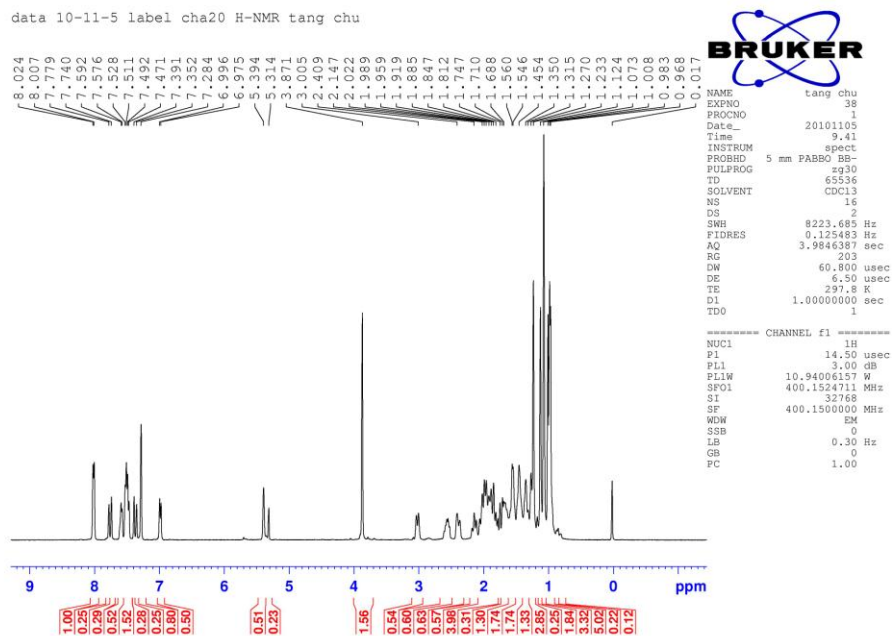

<sup>1</sup>H NMR spectrum of compound 1d

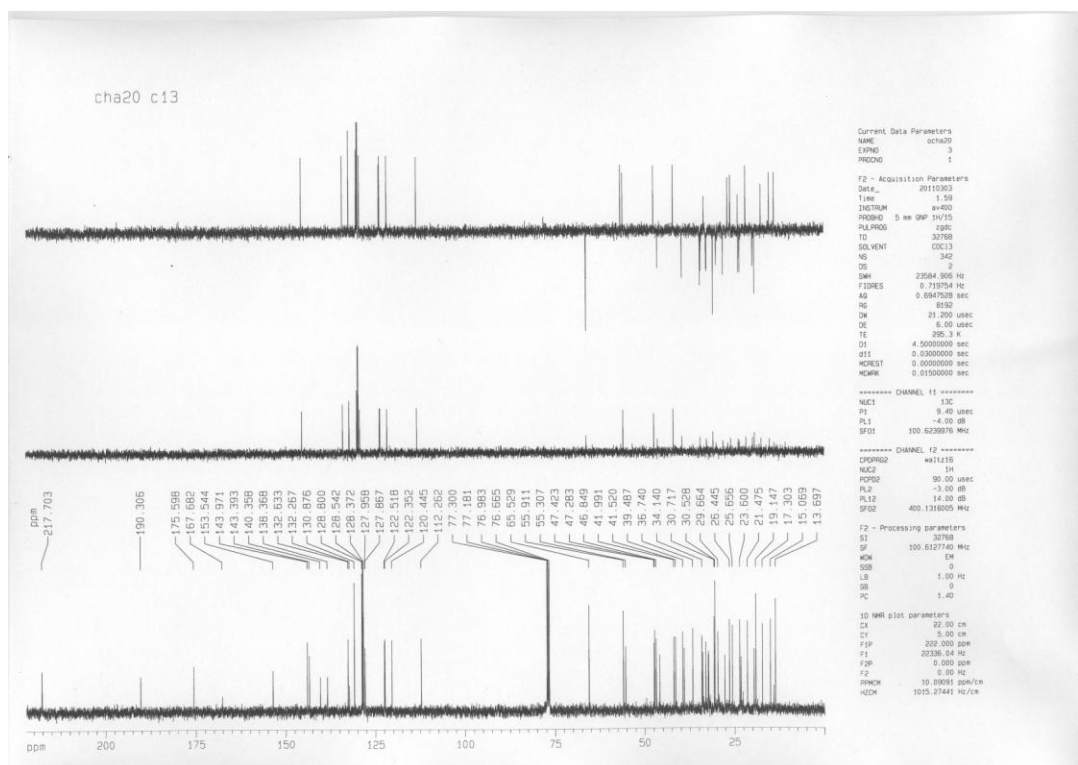

<sup>13</sup>C NMR spectrum of compound 1d

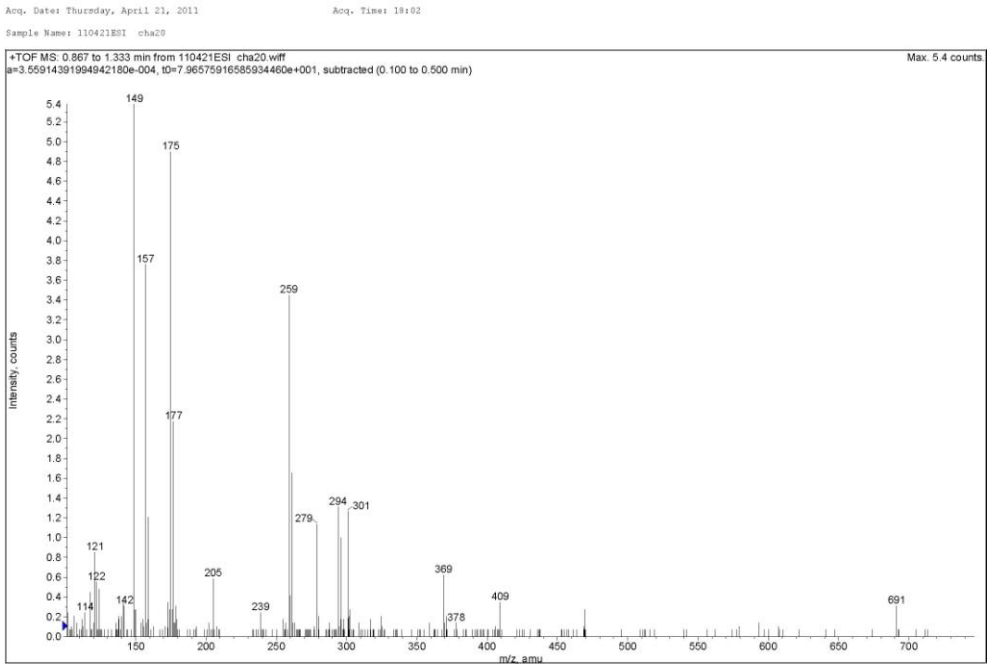

ESI-MS spectrum of compound **1d**

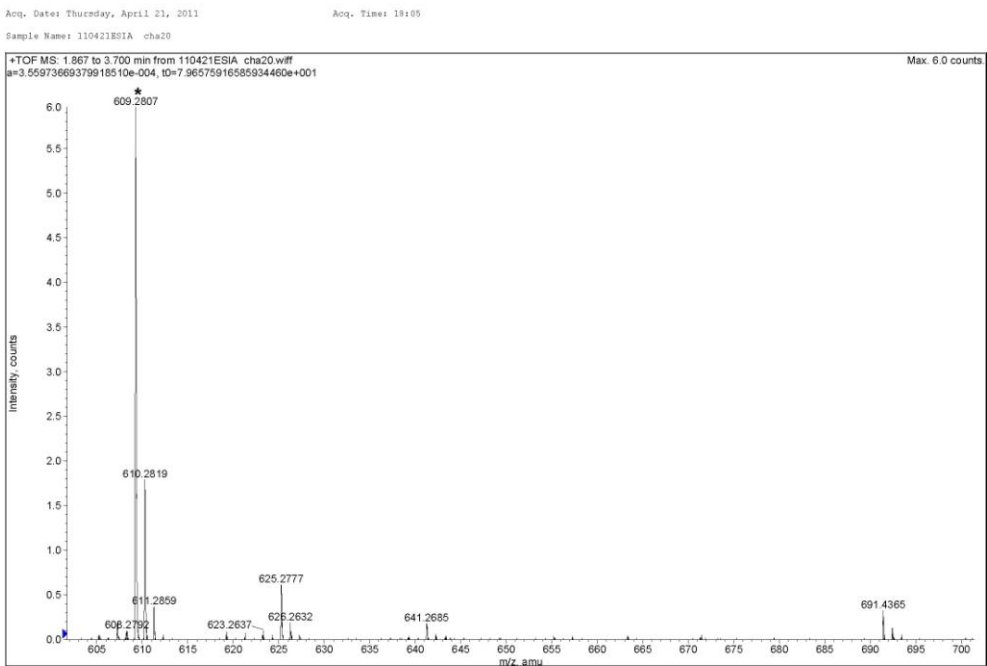

Acq. Date: Thursday, April 21, 2011  
Sample Name: 110421ESIA cha20

Acq. Time: 18:05

Elemental composition calculator

Target m/z: +691.4365 amu  
Tolerance: +10.0000 ppm  
Result type: Elemental  
Max num of results: 1000  
Min DBE: -10.0000 Max DBE: +60.0000  
Electron state: OddAndEven  
Num of charges: 0  
Add water: N/A  
Add proton: N/A  
File Name: 110421ESIA cha20.wiff

|    | Elements | Min Number | Max Number |
|----|----------|------------|------------|
| 1  | Br       | 0          | 0          |
| 2  | C        | 0          | 200        |
| 3  | Cl       | 0          | 0          |
| 4  | F        | 0          | 0          |
| 5  | H        | 0          | 400        |
| 6  | K        | 0          | 0          |
| 7  | N        | 0          | 0          |
| 8  | Na       | 0          | 0          |
| 9  | O        | 2          | 5          |
| 10 | P        | 0          | 0          |
| 11 | Pt       | 0          | 0          |

Acq. Date: Thursday, April 21, 2011  
Sample Name: 110421ESIA cha20

Acq. Time: 18:05

|    | Elements | Min Number | Max Number |
|----|----------|------------|------------|
| 12 | S        | 0          | 0          |
| 13 | Si       | 0          | 0          |

|   | Formula    | Calculated m/z (amu) | mDa Error | PPM Error | DBE  |
|---|------------|----------------------|-----------|-----------|------|
| 1 | C46 H59 O5 | 691.4362             | 0.2494    | 0.3607    | 17.5 |

HRESIMS spectrum of compound **1d**

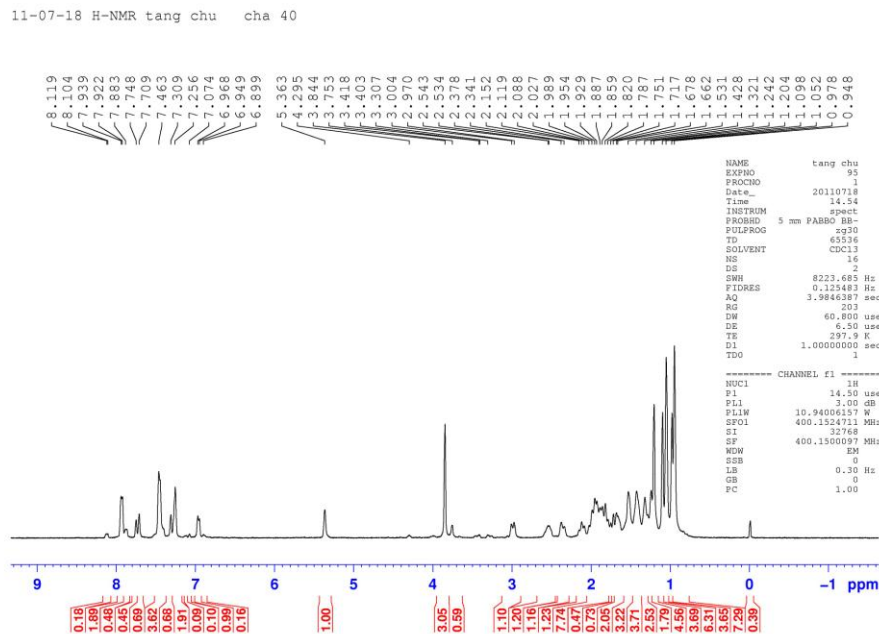

$^1\text{H}$  NMR spectrum of compound **1e**

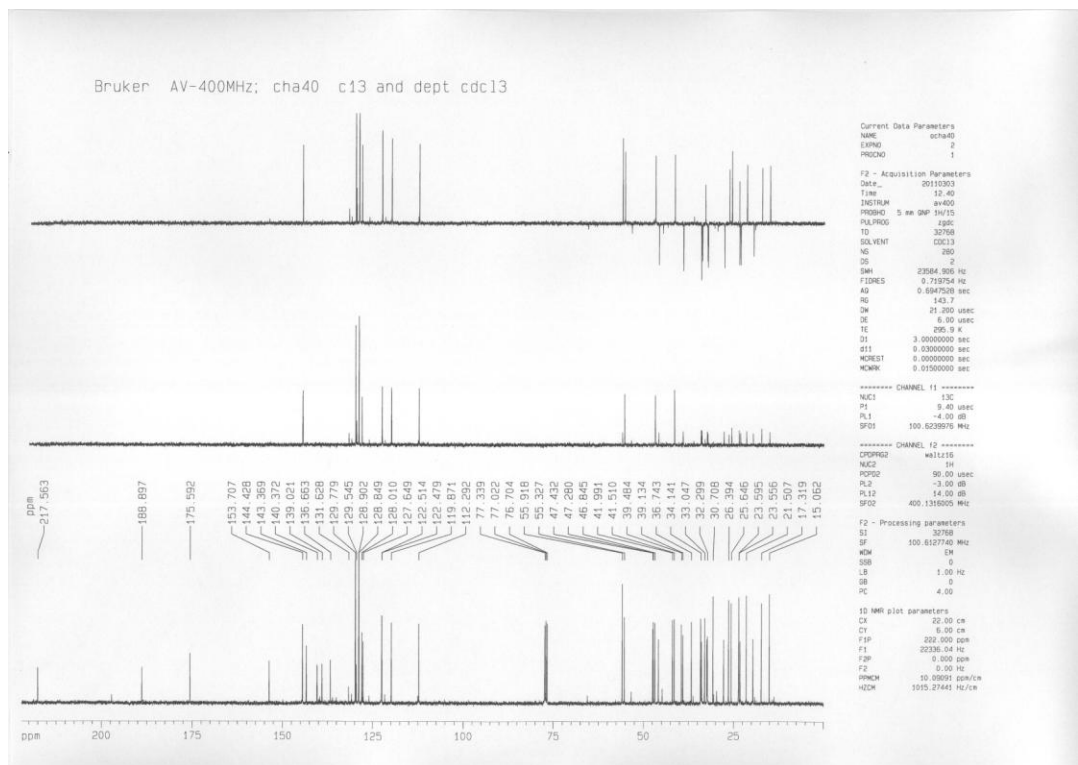

$^{13}\text{C}$  NMR spectrum of compound **1e**

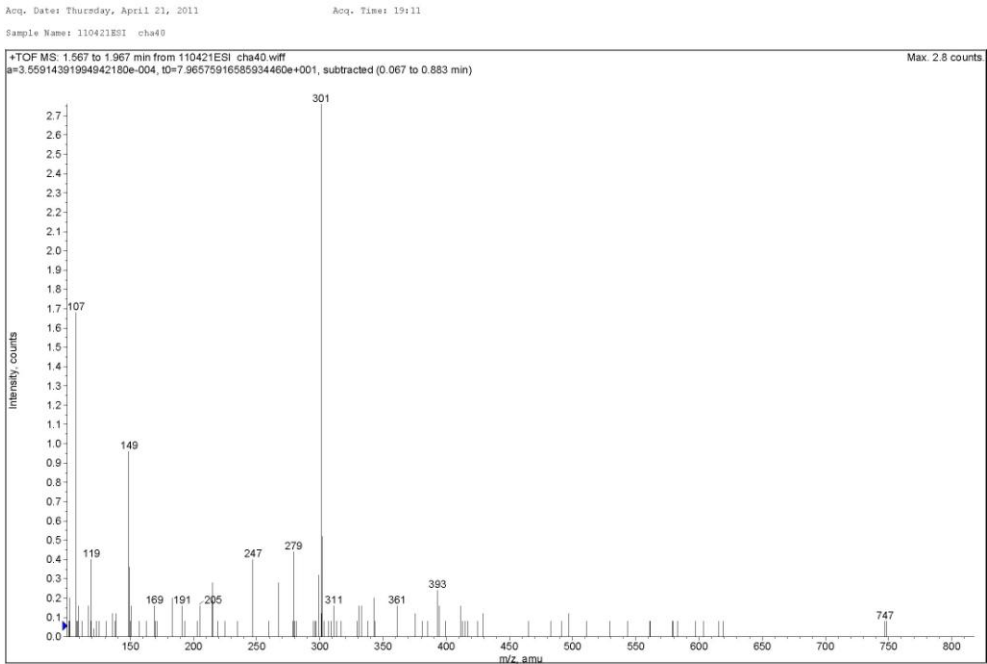

ESI-MS spectrum of compound **1e**

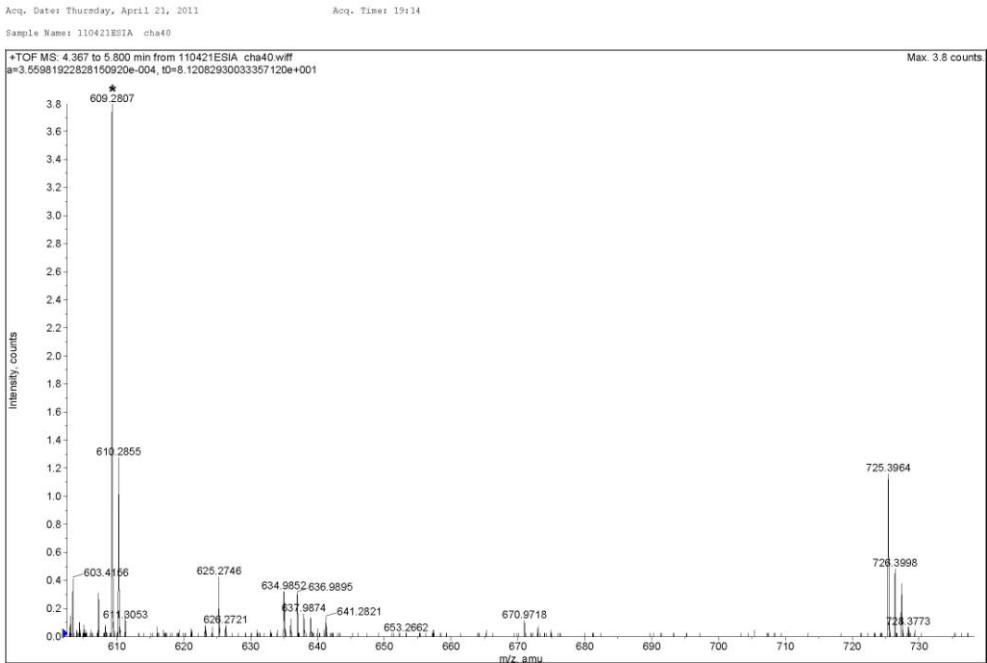

Acq. Date: Thursday, April 21, 2011      Acq. Time: 19:14  
Sample Name: 110421ESIA\_ cha40

|    | Elements | Min Number | Max Number |
|----|----------|------------|------------|
| 12 | S        | 0          | 0          |
| 13 | Si       | 0          | 0          |

  

|   | Formula       | Calculated m/z (amu) | mDa Error | PPM Error | DBE  |
|---|---------------|----------------------|-----------|-----------|------|
| 1 | C46 H58 O5 Cl | 725.3972             | -0.8782   | -1.2107   | 17.5 |

Acq. Date: Thursday, April 21, 2011      Acq. Time: 19:14  
Sample Name: 110421ESIA\_ cha40

Elemental composition calculator  
Target m/z: +725.3964      amu  
Tolerance: +10.0000      ppm  
Result type: Elemental  
Max num of results: 1000  
Min DBE: -10.0000      Max DBE: +60.0000  
Electron state: OddAndEven  
Num of charges: 0  
Add water: N/A  
Add proton: N/A  
File Name: 110421ESIA\_ cha40.wiff

|    | Elements | Min Number | Max Number |
|----|----------|------------|------------|
| 1  | Br       | 0          | 0          |
| 2  | C        | 0          | 200        |
| 3  | Cl       | 1          | 1          |
| 4  | F        | 0          | 0          |
| 5  | H        | 0          | 400        |
| 6  | K        | 0          | 0          |
| 7  | N        | 0          | 0          |
| 8  | Na       | 0          | 0          |
| 9  | O        | 2          | 5          |
| 10 | P        | 0          | 0          |
| 11 | Pt       | 0          | 0          |

HRESIMS spectrum of compound **1e**



data 11-01-12 label cha36 H-NMR tang chu

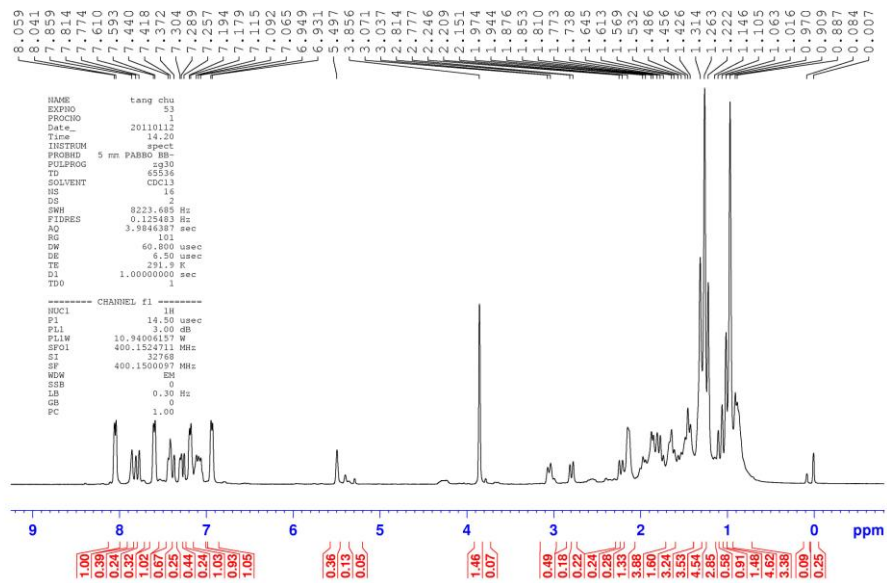

<sup>1</sup>H NMR spectrum of compound 2a

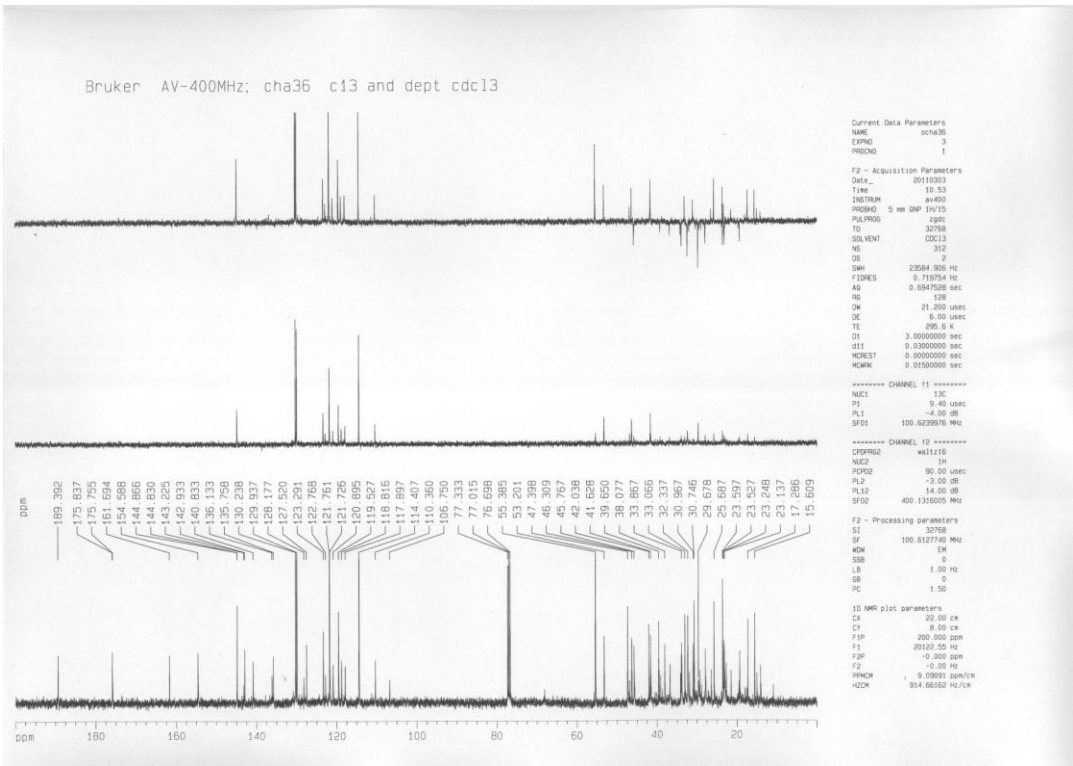

<sup>13</sup>C NMR spectrum of compound 2a

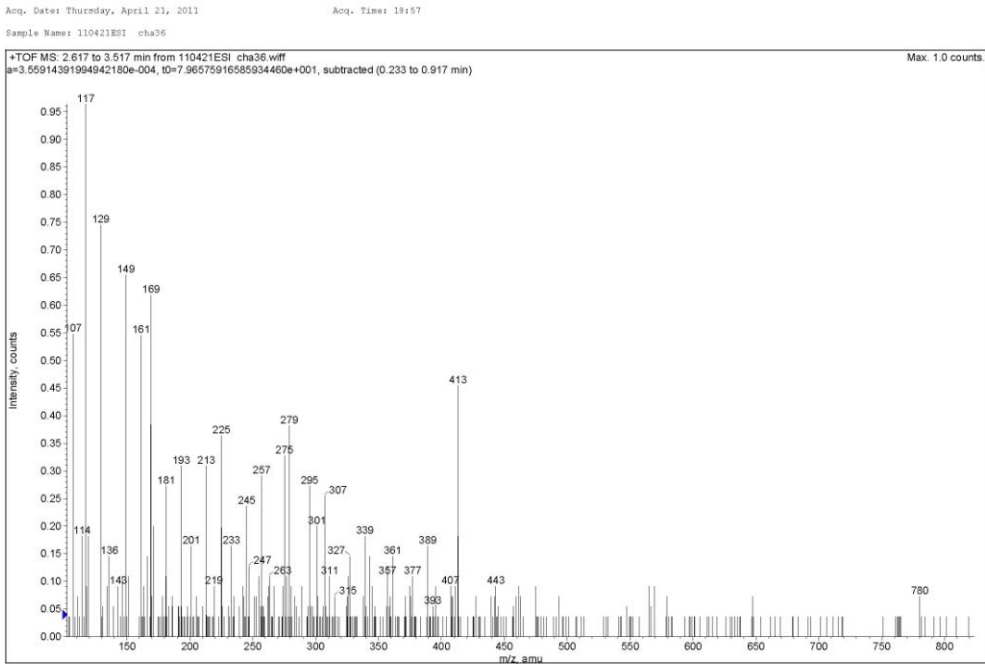

ESI-MS spectrum of compound **2a**

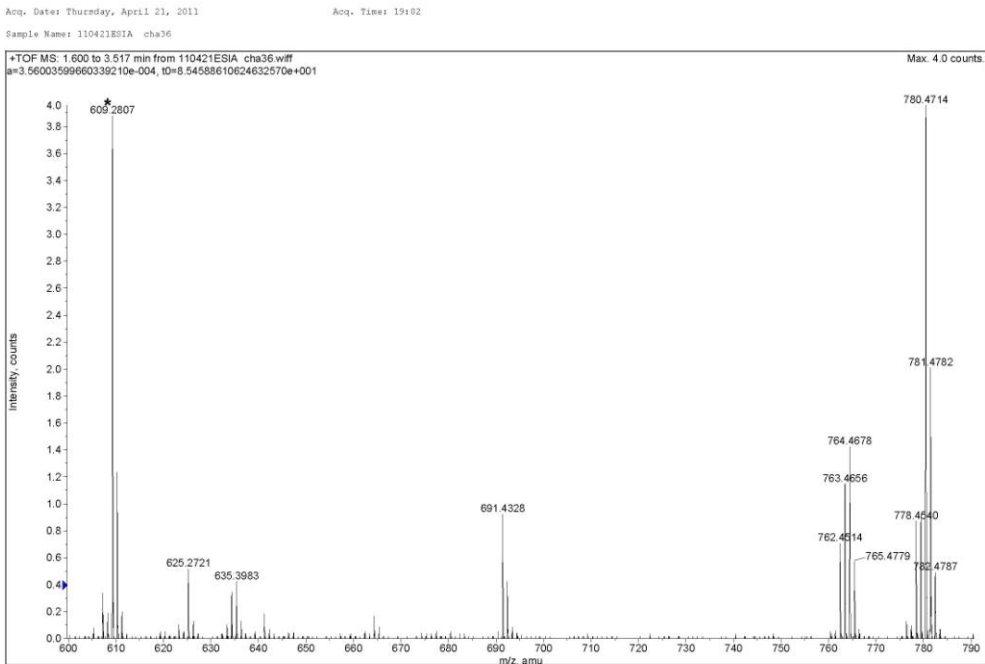

Acq. Date: Thursday, April 21, 2011  
Sample Name: 110421ESIA cha36

Acq. Time: 19:02

| Elemental composition calculator |                       |          |          |
|----------------------------------|-----------------------|----------|----------|
| Target m/z:                      | +764.4678             | amu      |          |
| Tolerance:                       | +10.0000              | ppm      |          |
| Result type:                     | Elemental             |          |          |
| Max num of results:              | 1000                  |          |          |
| Min DBE:                         | -10.0000              | Max DBE: | +60.0000 |
| Electron state:                  | OddAndEven            |          |          |
| Num of charges:                  | 0                     |          |          |
| Add water:                       | N/A                   |          |          |
| Add proton:                      | N/A                   |          |          |
| File Name:                       | 110421ESIA cha36.wiff |          |          |

|    | Elements | Min Number | Max Number |
|----|----------|------------|------------|
| 1  | Br       | 0          | 0          |
| 2  | C        | 0          | 200        |
| 3  | Cl       | 0          | 0          |
| 4  | F        | 0          | 0          |
| 5  | H        | 0          | 400        |
| 6  | K        | 0          | 0          |
| 7  | N        | 1          | 1          |
| 8  | Na       | 0          | 0          |
| 9  | O        | 2          | 5          |
| 10 | P        | 0          | 0          |
| 11 | Pt       | 0          | 0          |

Acq. Date: Thursday, April 21, 2011  
Sample Name: 110421ESIA cha36

Acq. Time: 19:02

|    | Elements | Min Number | Max Number |
|----|----------|------------|------------|
| 12 | S        | 0          | 0          |
| 13 | Si       | 0          | 0          |

|   | Formula      | Calculated m/z (amu) | mDa Error | PPM Error | DBE  |
|---|--------------|----------------------|-----------|-----------|------|
| 1 | C52 H62 N O4 | 764.4678             | -0.0850   | -0.1112   | 22.5 |

HRESIMS spectrum of compound 2a

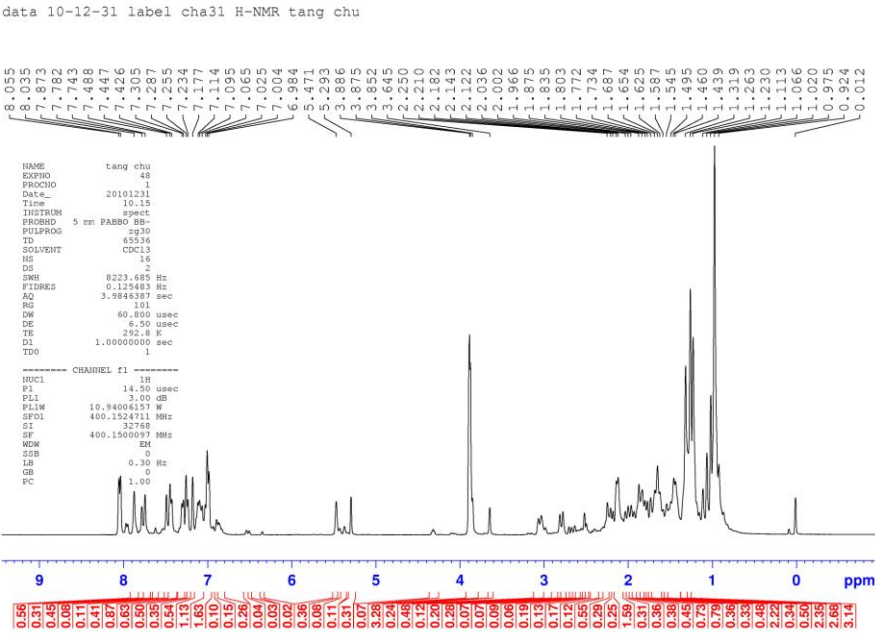

<sup>1</sup>H NMR spectrum of compound **2b**

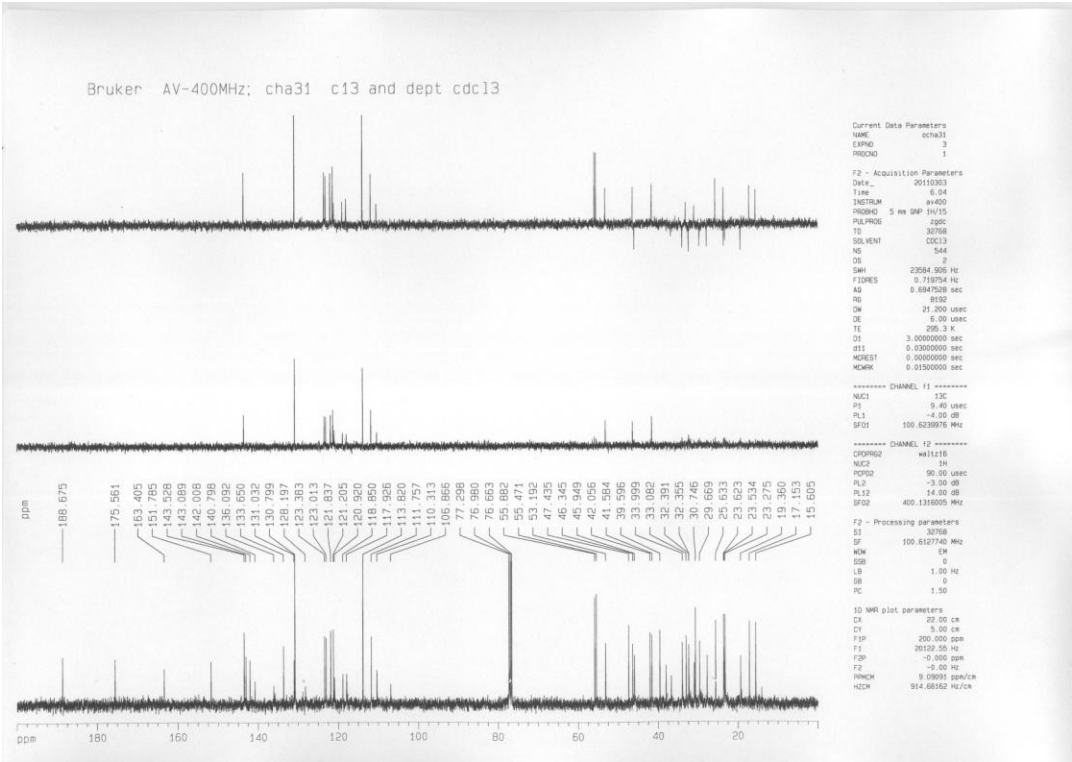

<sup>13</sup>C NMR spectrum of compound **2b**

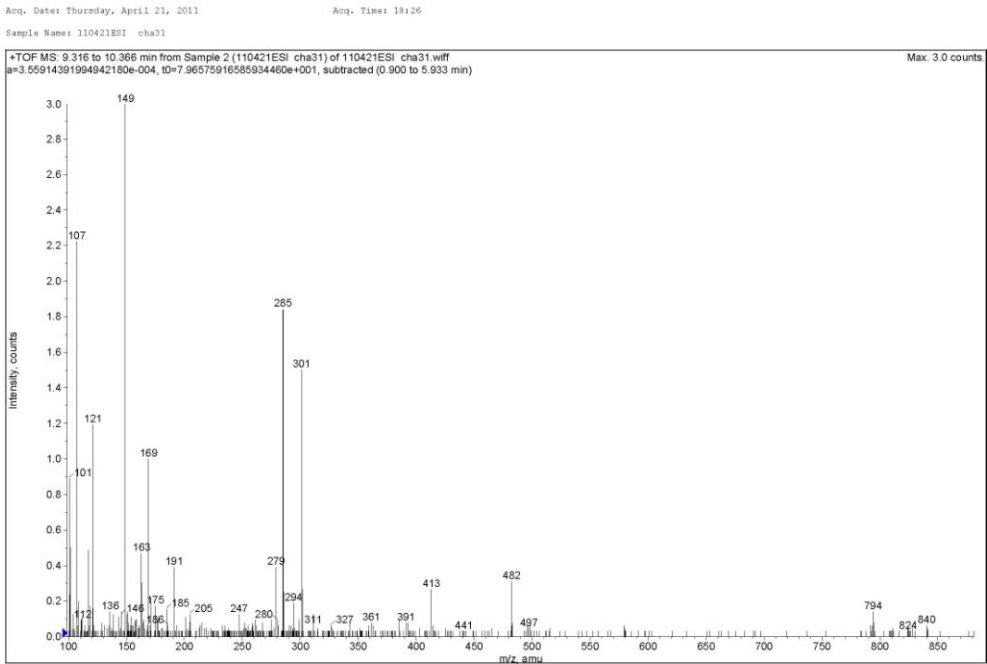

ESI-MS spectrum of compound **2b**

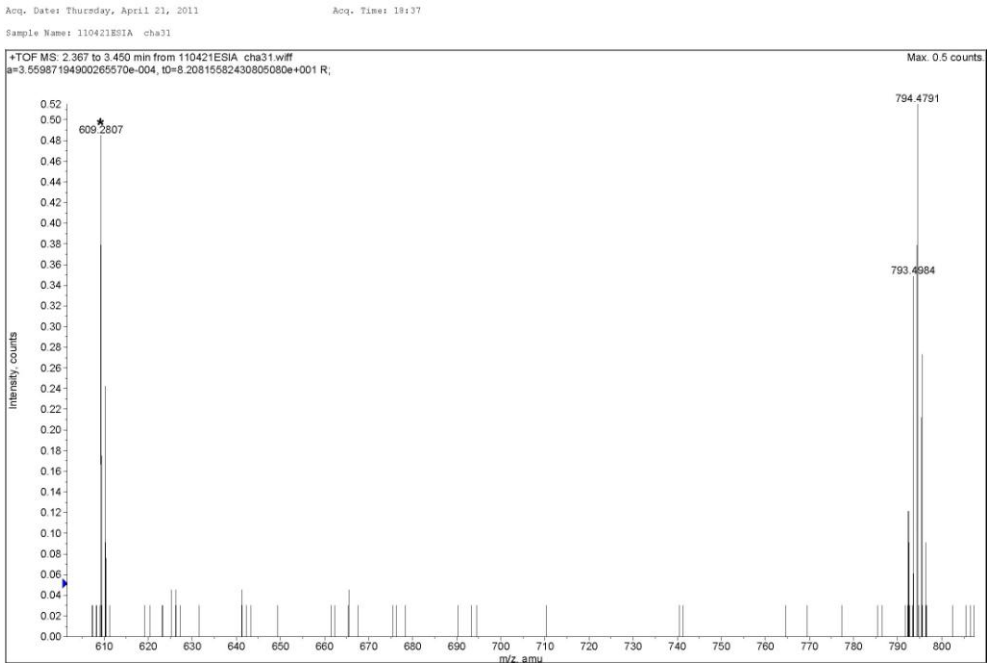

Acq. Date: Thursday, April 21, 2011  
Sample Name: 110421ESIA cha31

Acq. Time: 18:37

|                                  |                       |          |          |
|----------------------------------|-----------------------|----------|----------|
| Elemental composition calculator |                       |          |          |
| Target m/z:                      | +794.4791             | amu      |          |
| Tolerance:                       | +10.0000              | ppm      |          |
| Result type:                     | Elemental             |          |          |
| Max num of results:              | 1000                  |          |          |
| Min DBE:                         | -10.0000              | Max DBE: | +60.0000 |
| Electron state:                  | OddAndEven            |          |          |
| Num of charges:                  | 0                     |          |          |
| Add water:                       | N/A                   |          |          |
| Add proton:                      | N/A                   |          |          |
| File Name:                       | 110421ESIA cha31.wiff |          |          |

|    | Elements | Min Number | Max Number |
|----|----------|------------|------------|
| 1  | Br       | 0          | 0          |
| 2  | C        | 0          | 200        |
| 3  | Cl       | 0          | 0          |
| 4  | F        | 0          | 0          |
| 5  | H        | 0          | 400        |
| 6  | K        | 0          | 0          |
| 7  | N        | 1          | 1          |
| 8  | Na       | 0          | 0          |
| 9  | O        | 2          | 5          |
| 10 | P        | 0          | 0          |
| 11 | Pt       | 0          | 0          |

Acq. Date: Thursday, April 21, 2011  
Sample Name: 110421ESIA cha31

Acq. Time: 18:37

|    | Elements | Min Number | Max Number |
|----|----------|------------|------------|
| 12 | S        | 0          | 0          |
| 13 | Si       | 0          | 0          |

|   | Formula      | Calculated m/z (amu) | mDa Error | PPM Error | DBE  |
|---|--------------|----------------------|-----------|-----------|------|
| 1 | C53 H64 N O5 | 794.4784             | 0.6502    | 0.8184    | 22.5 |

HRESIMS spectrum of compound **2b**

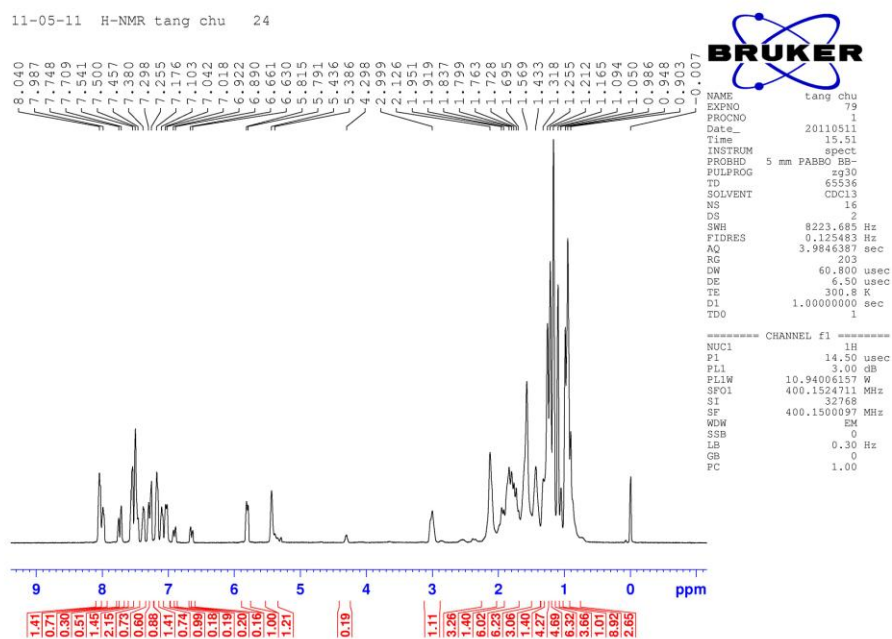

$^1\text{H}$  NMR spectrum of compound **3a**

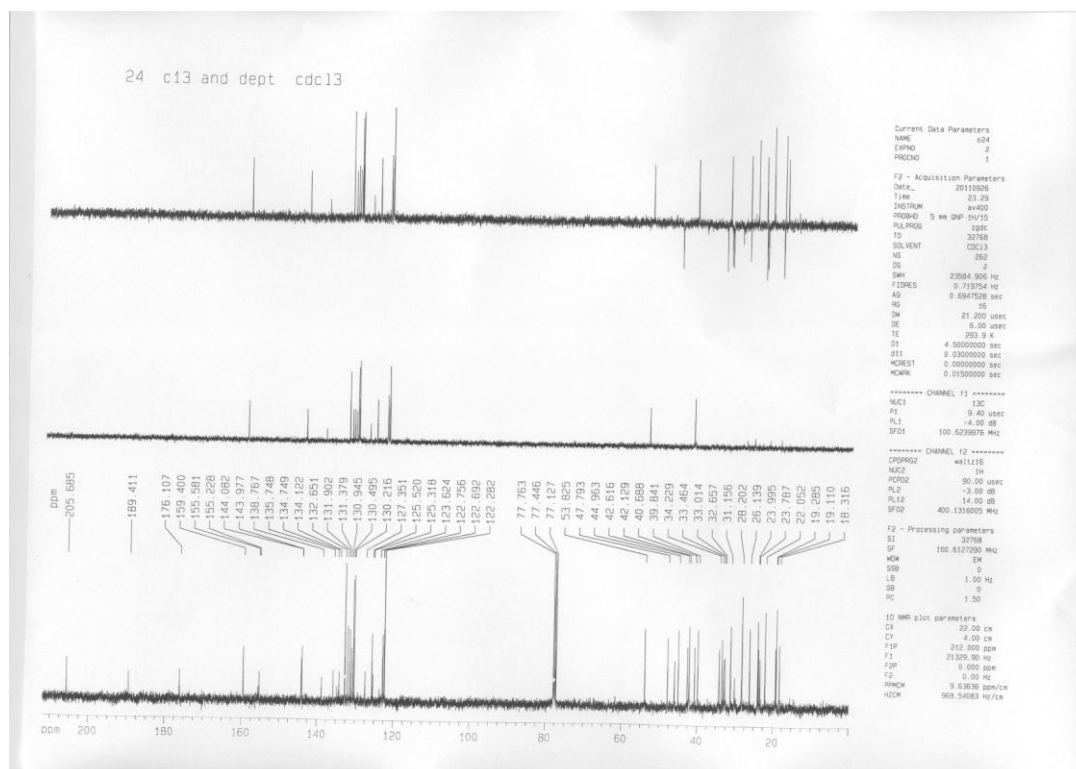

$^{13}\text{C}$  NMR spectrum of compound **3a**



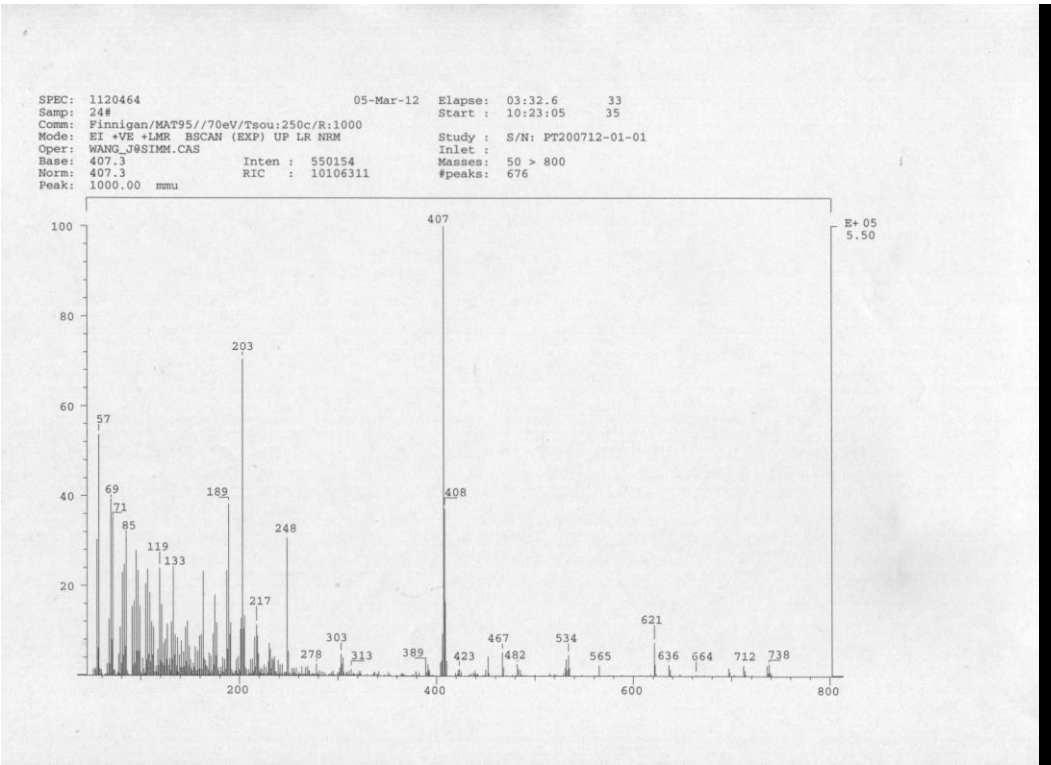

EI-MS spectrum of compound 3a

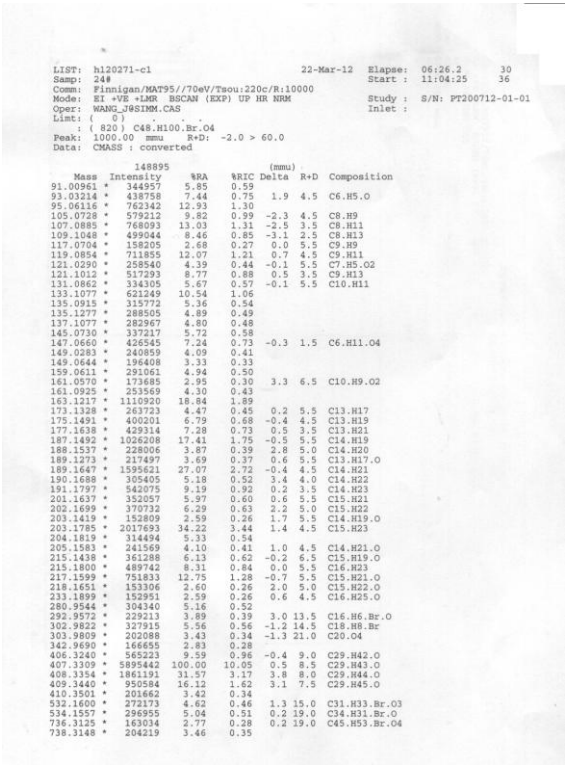

HREIMS spectrum of compound 3a



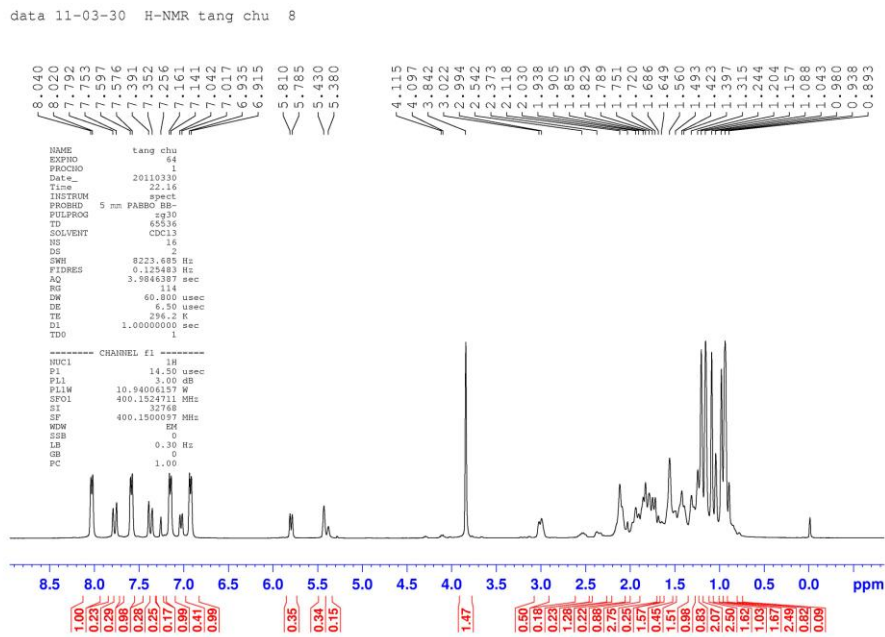

<sup>1</sup>H NMR spectrum of compound **3b**

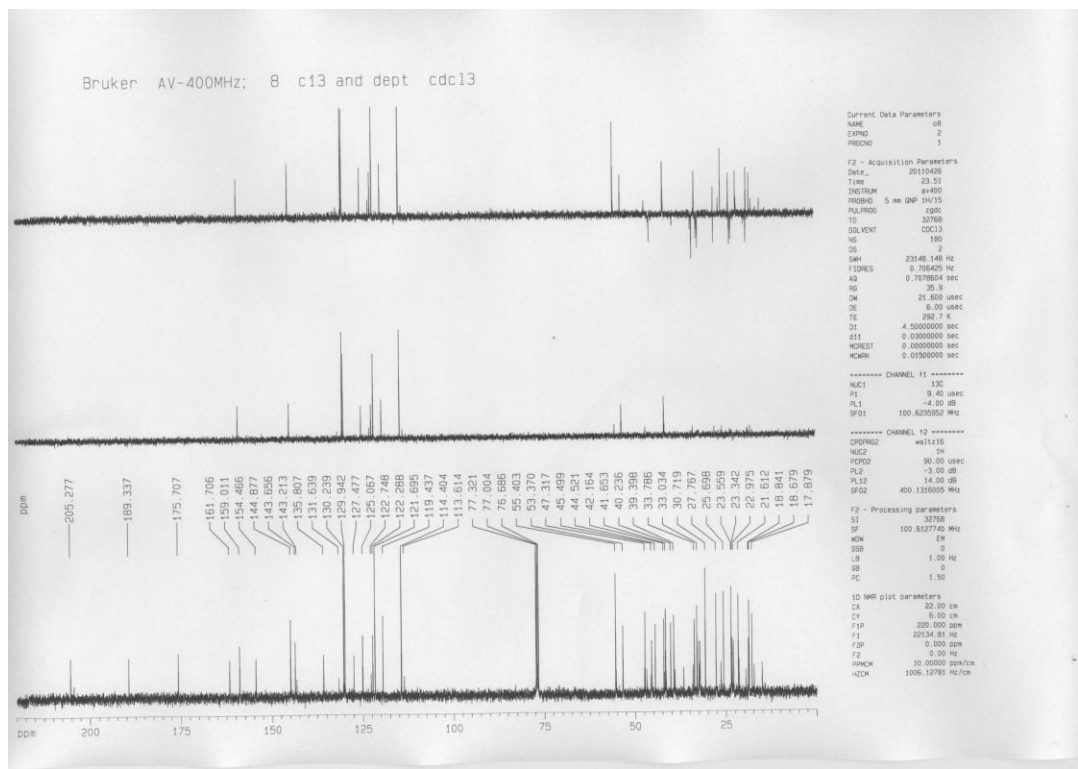

<sup>13</sup>C NMR spectrum of compound **3b**

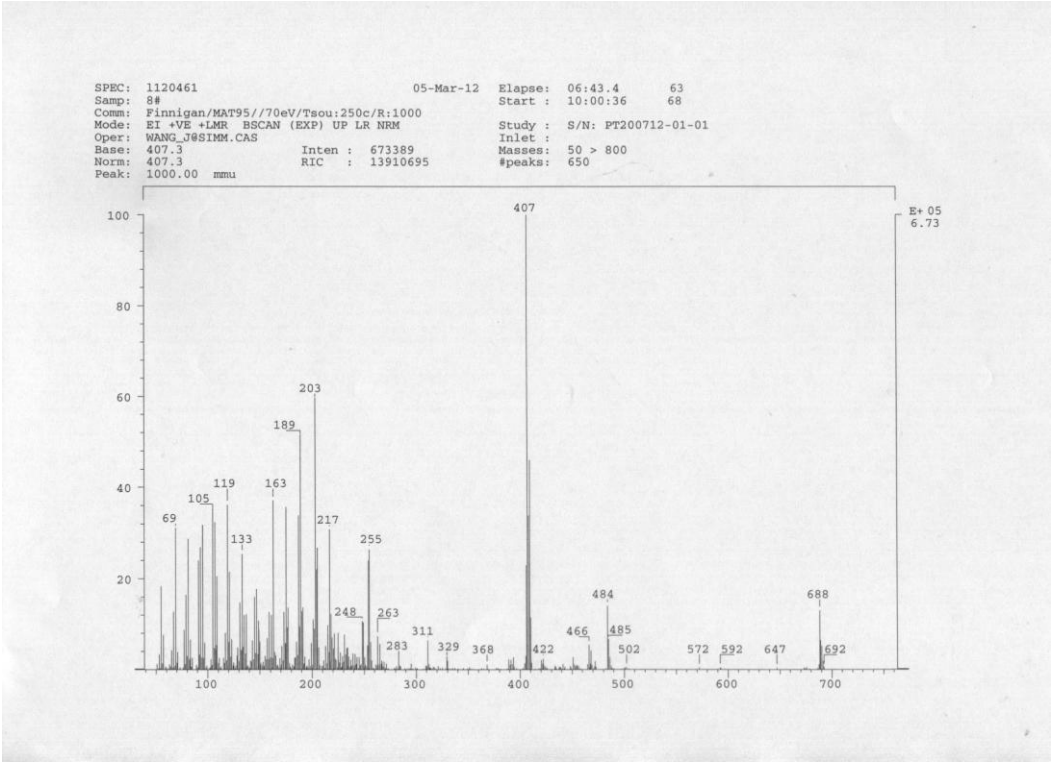

EI-MS spectrum of compound **3b**

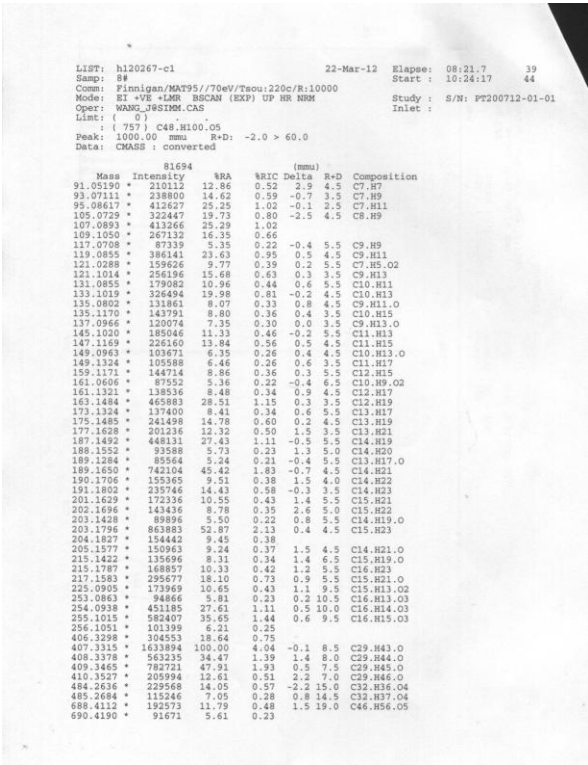

HREIMS spectrum of compound **3b**

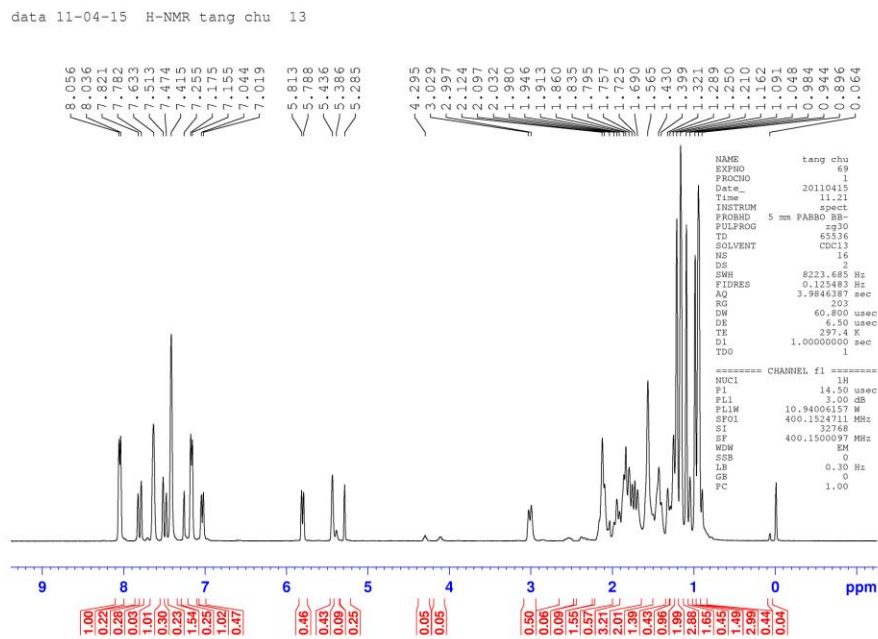

<sup>1</sup>H NMR spectrum of compound **3c**

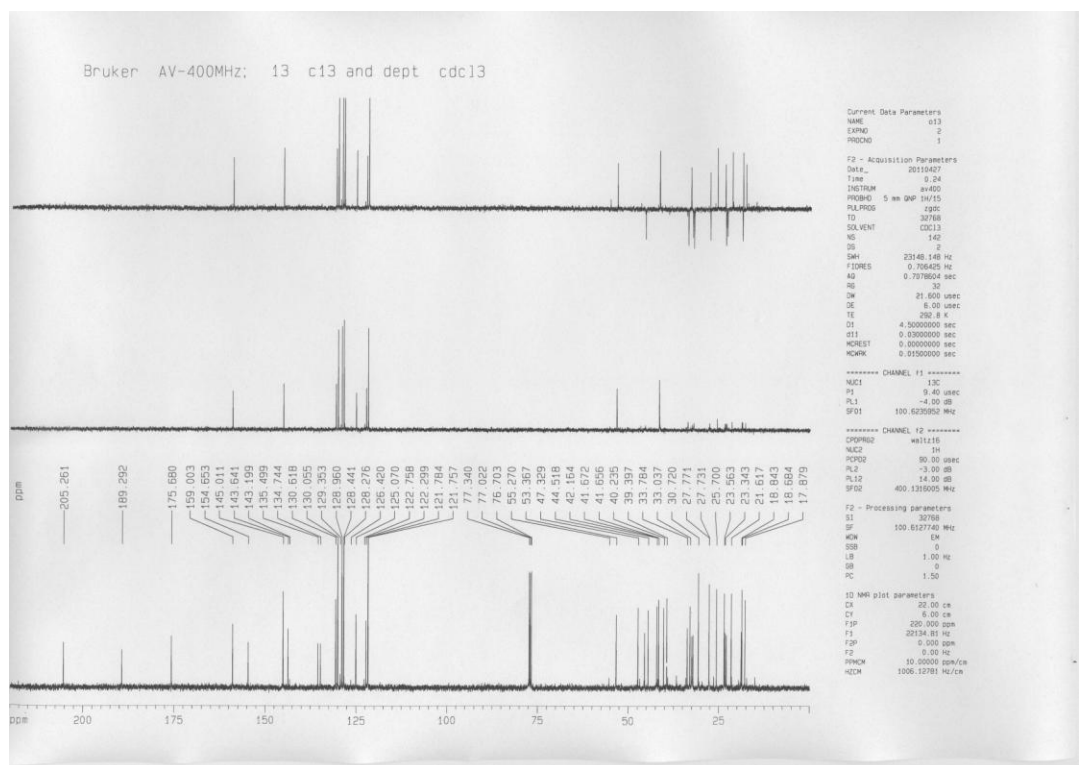

<sup>13</sup>C NMR spectrum of compound **3c**

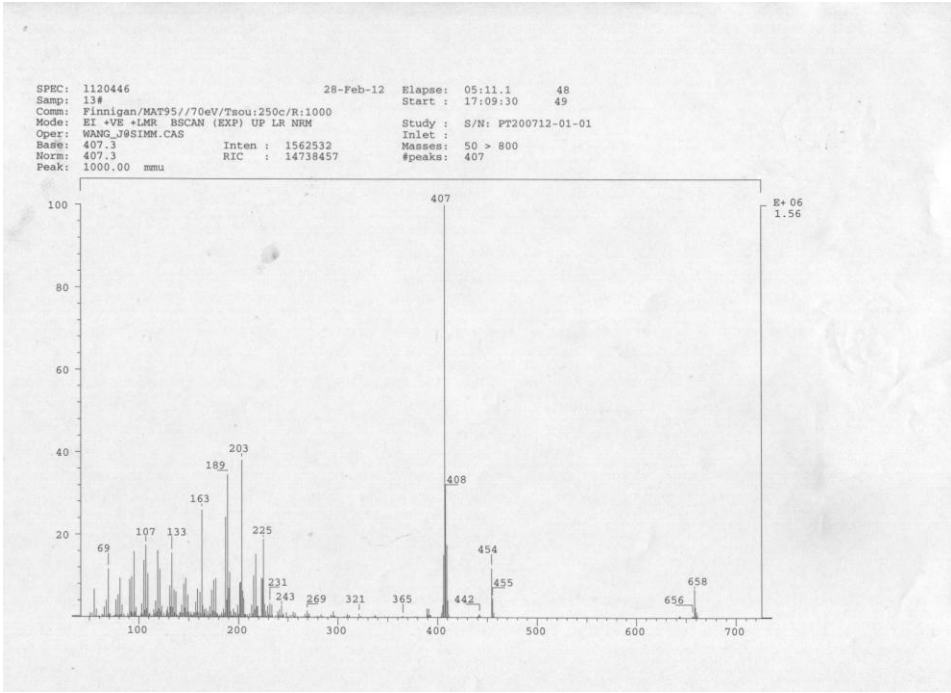

EI-MS spectrum of compound **3c**

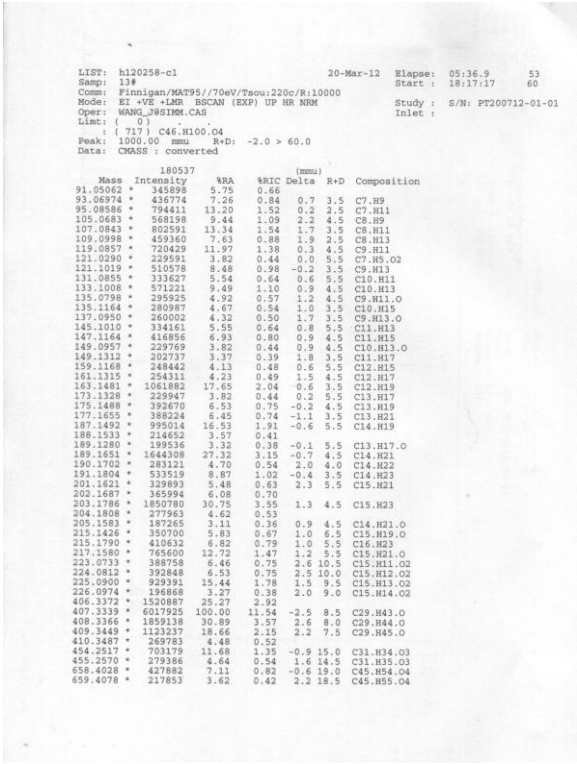

HREIMS spectrum of compound **3c**



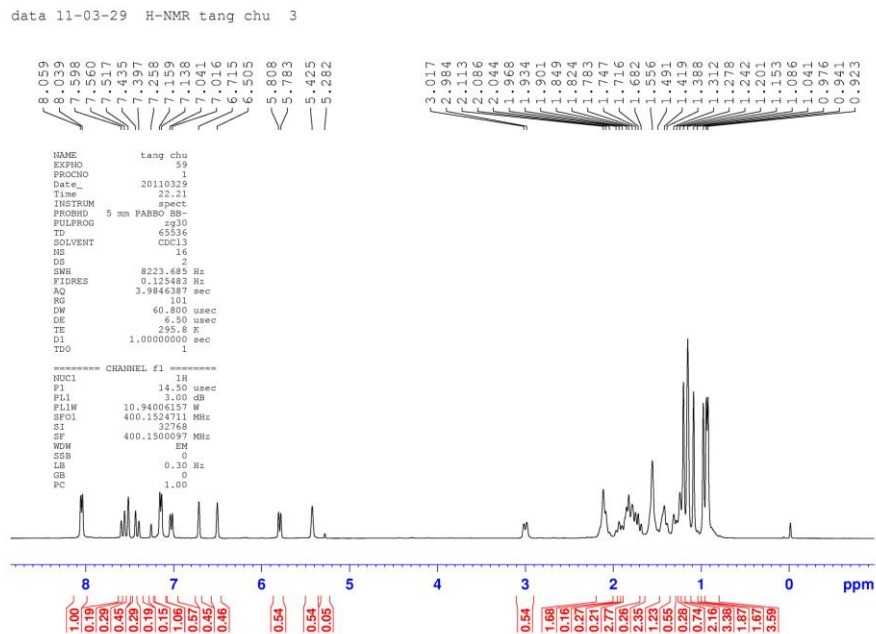

<sup>1</sup>H NMR spectrum of compound **3d**

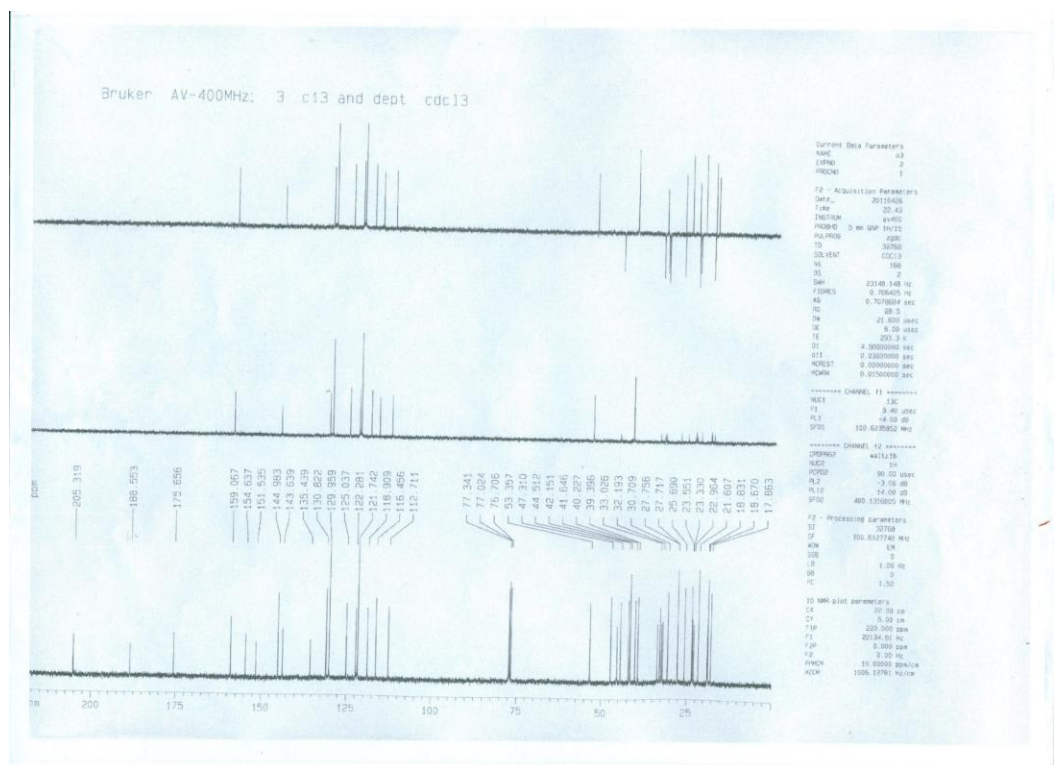

<sup>13</sup>C NMR spectrum of compound **3d**

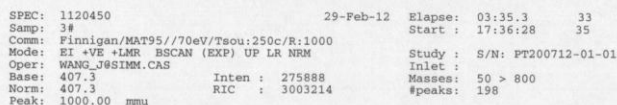EI-MS spectrum of compound **3d**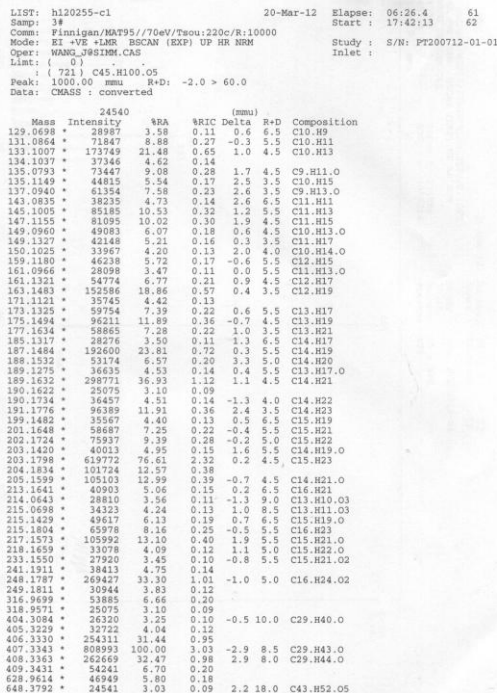HREIMS spectrum of compound **3d**

11-05-11 H-NMR tang chu 23

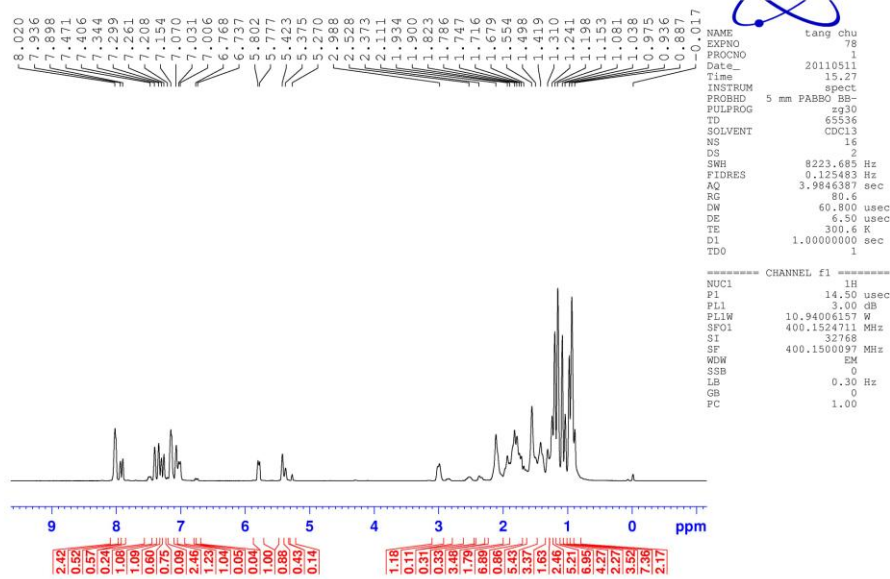

<sup>1</sup>H NMR spectrum of compound 3e

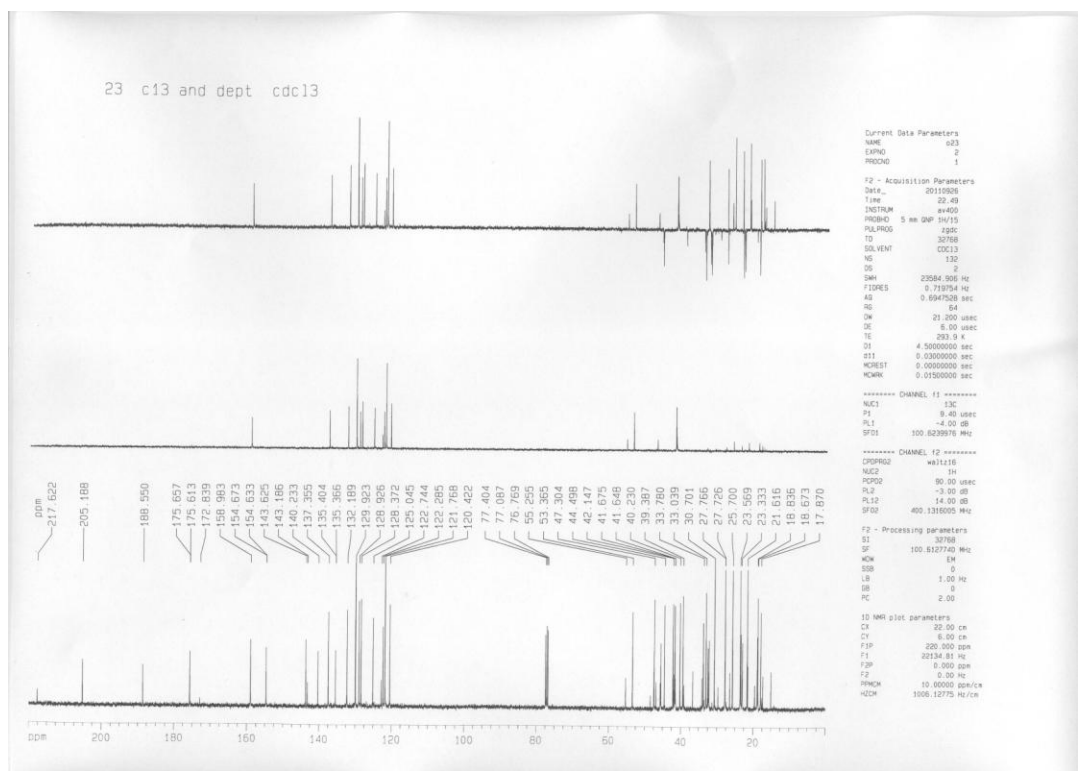

<sup>13</sup>C NMR spectrum of compound 3e

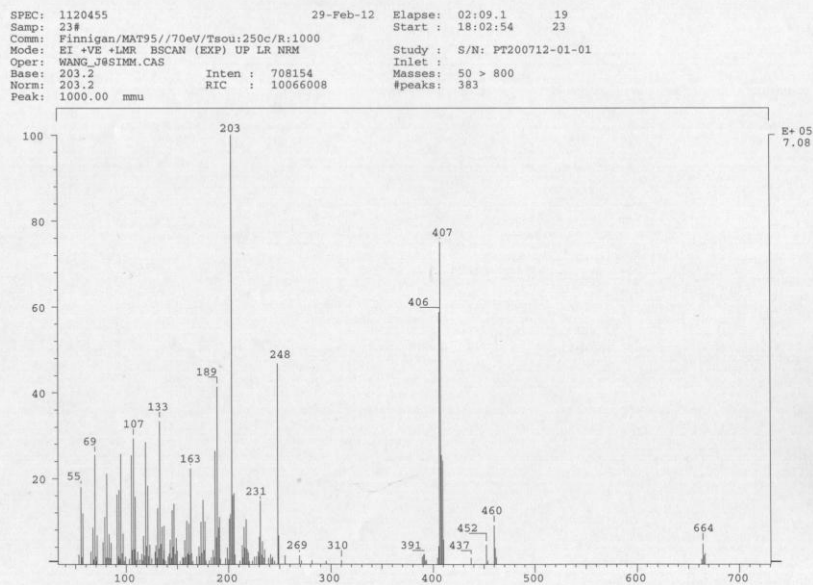EI-MS spectrum of compound **3e**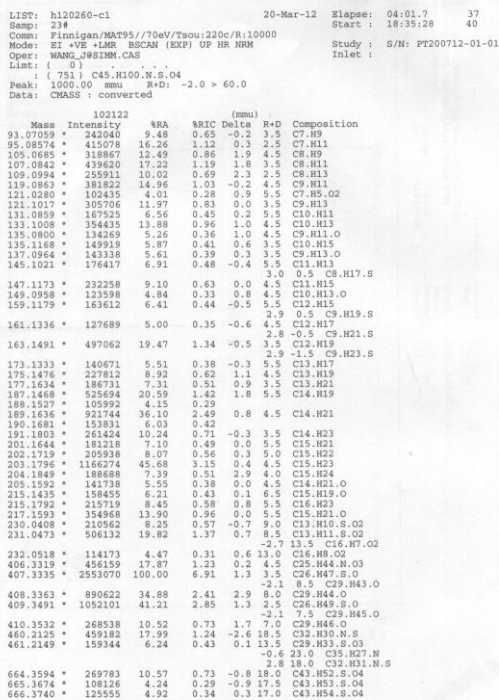HREIMS spectrum of compound **3e**



11-06-08 H-NMR tang chu 31

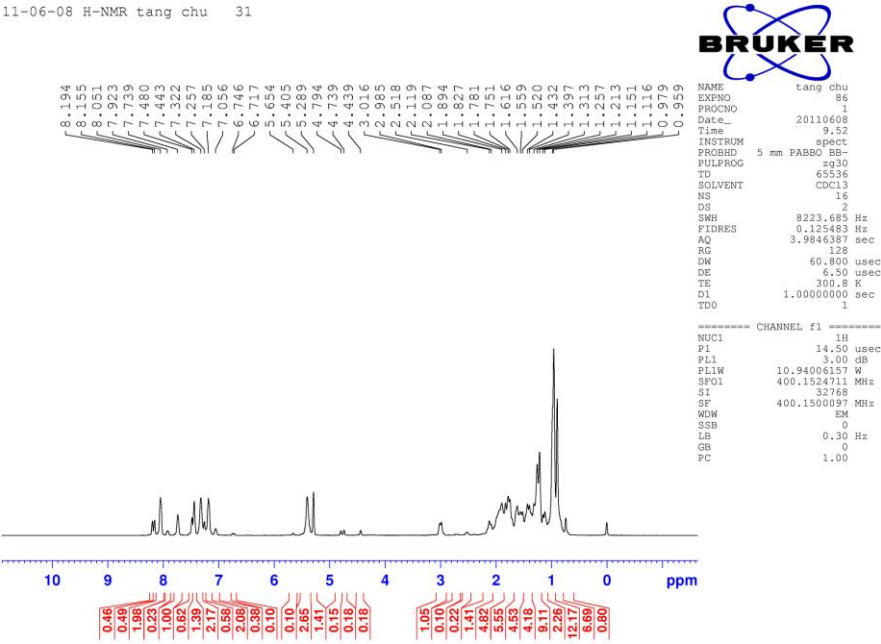

<sup>1</sup>H NMR spectrum of compound 4a

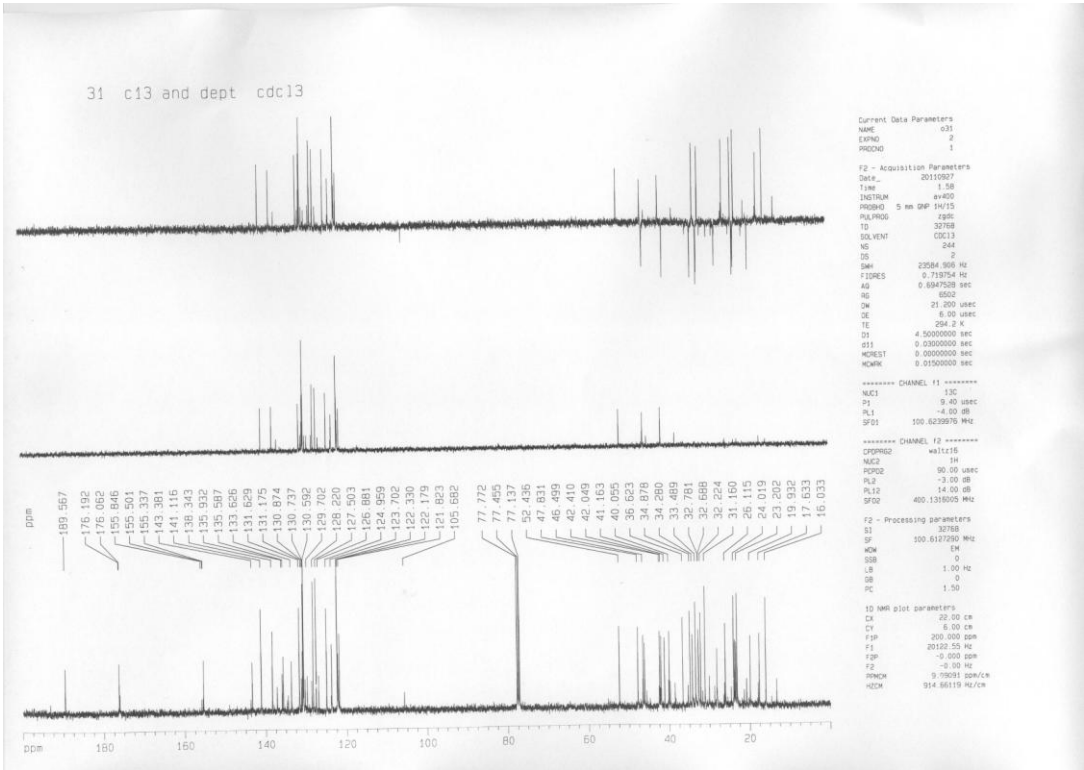

<sup>13</sup>C NMR spectrum of compound 4a

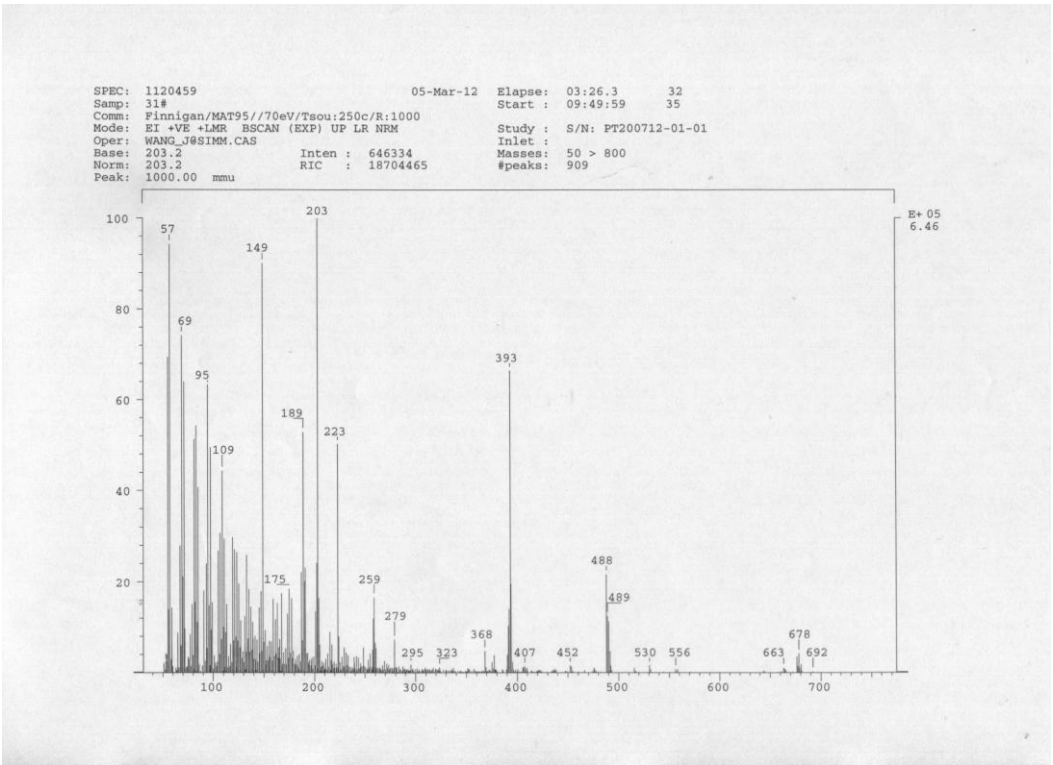

EI-MS spectrum of compound 4a

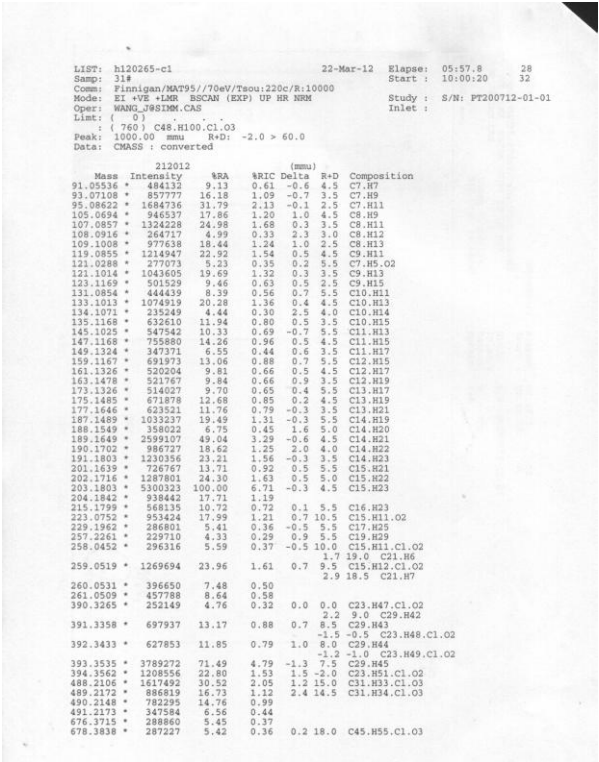

HREIMS spectrum of compound 4a

data 11-04-15 H-NMR tang chu 15

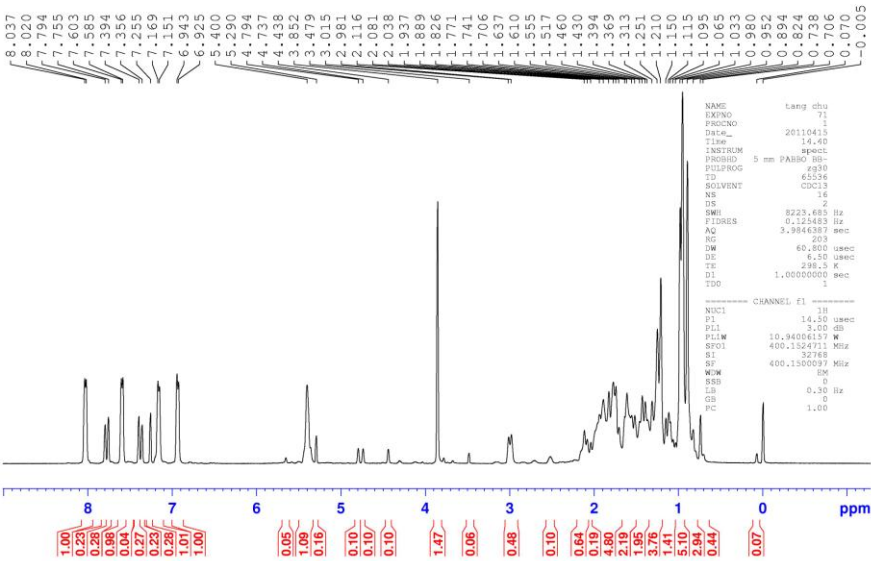

<sup>1</sup>H NMR spectrum of compound 4b

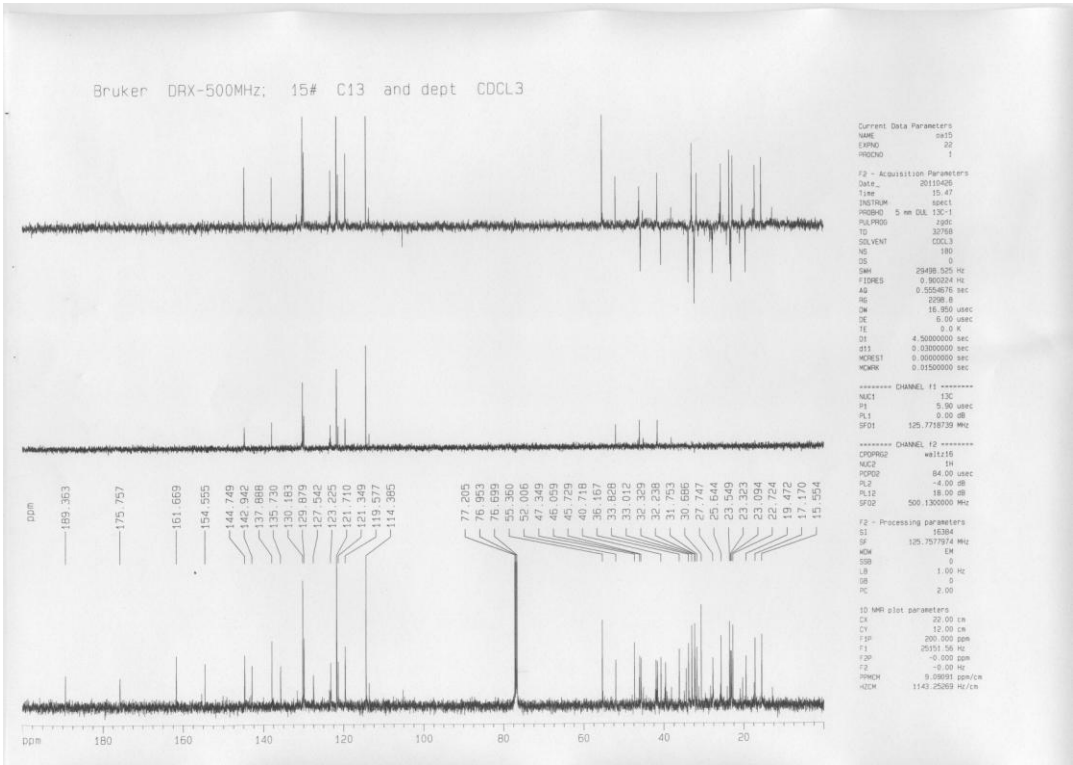

<sup>13</sup>C NMR spectrum of compound 4b

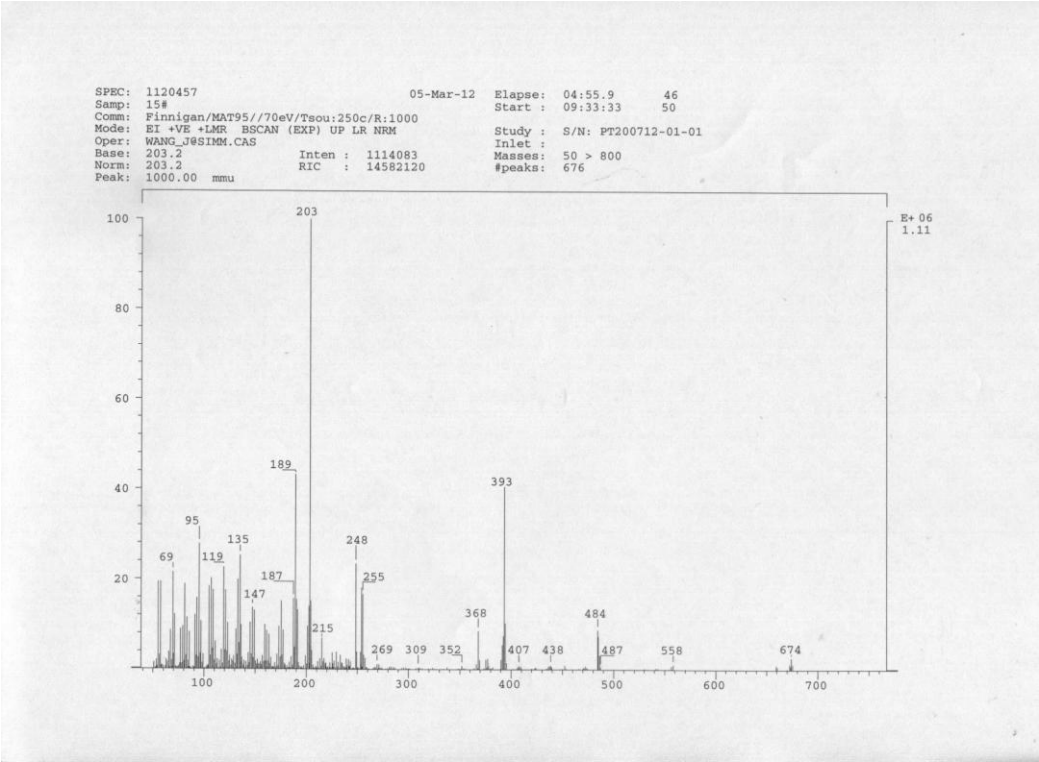

EI-MS spectrum of compound **4b**

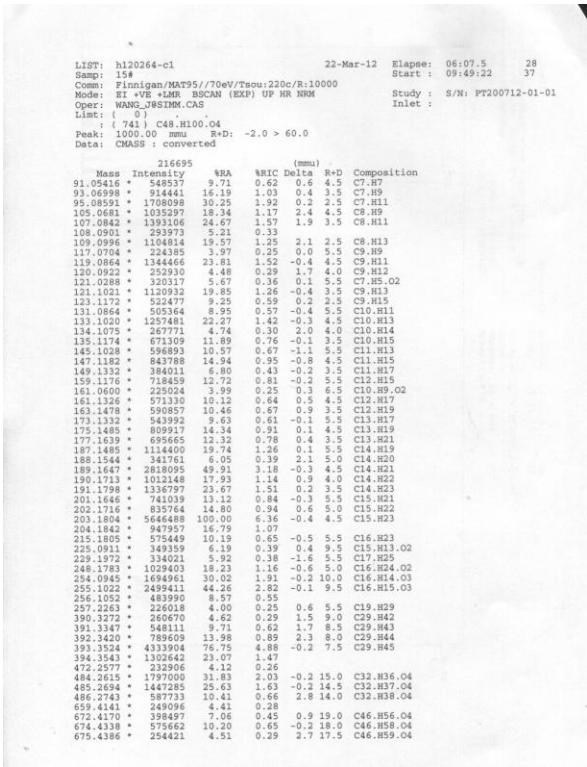

HREIMS spectrum of compound **4b**



data 11-04-15 H-NMR tang chu 14

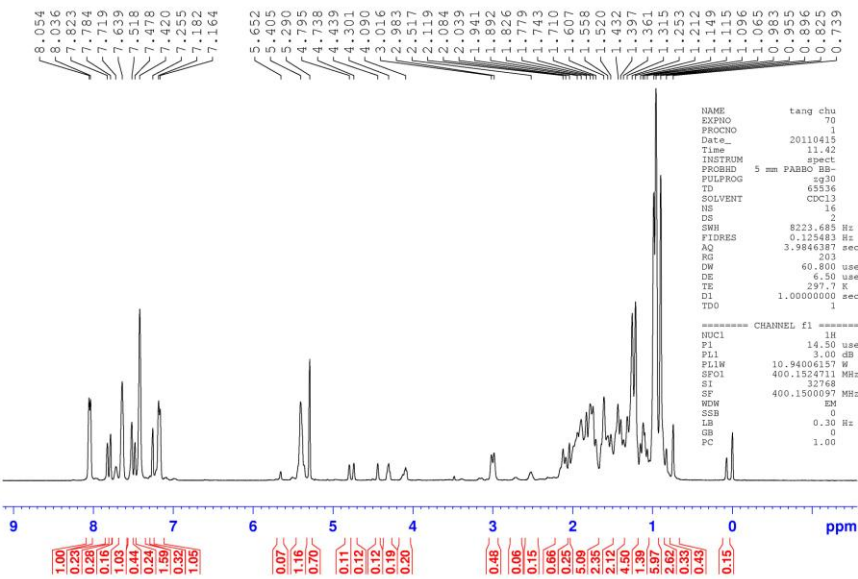

<sup>1</sup>H NMR spectrum of compound 4c

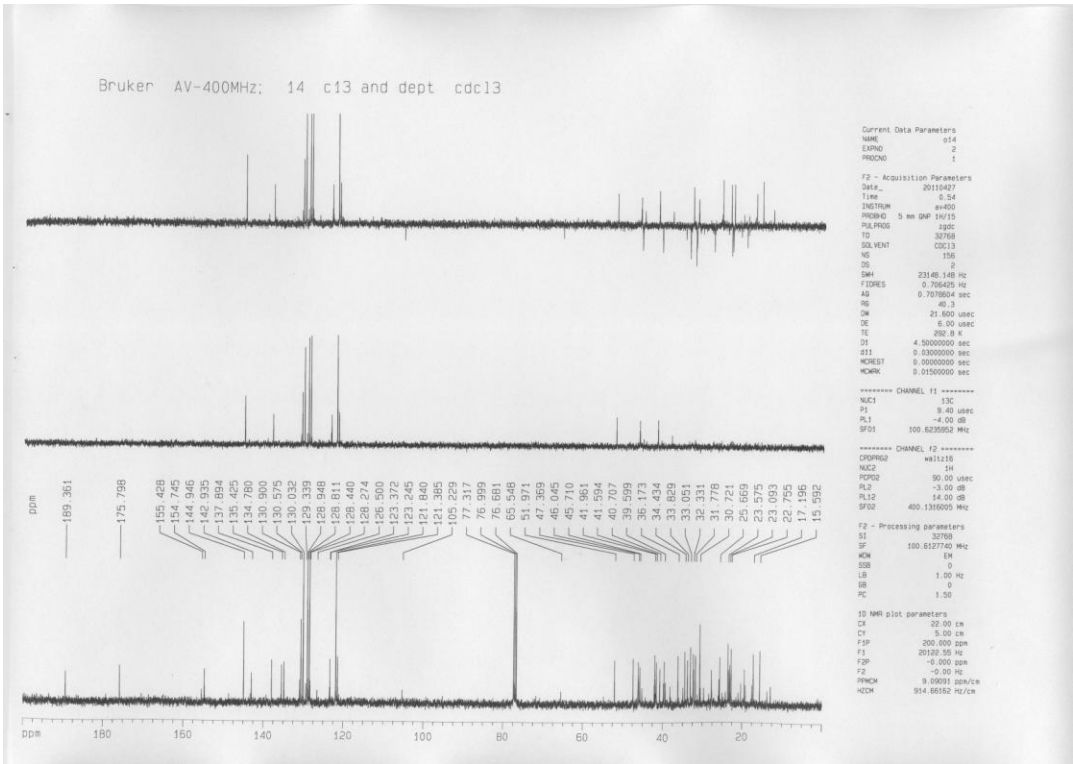

<sup>13</sup>C NMR spectrum of compound 4c

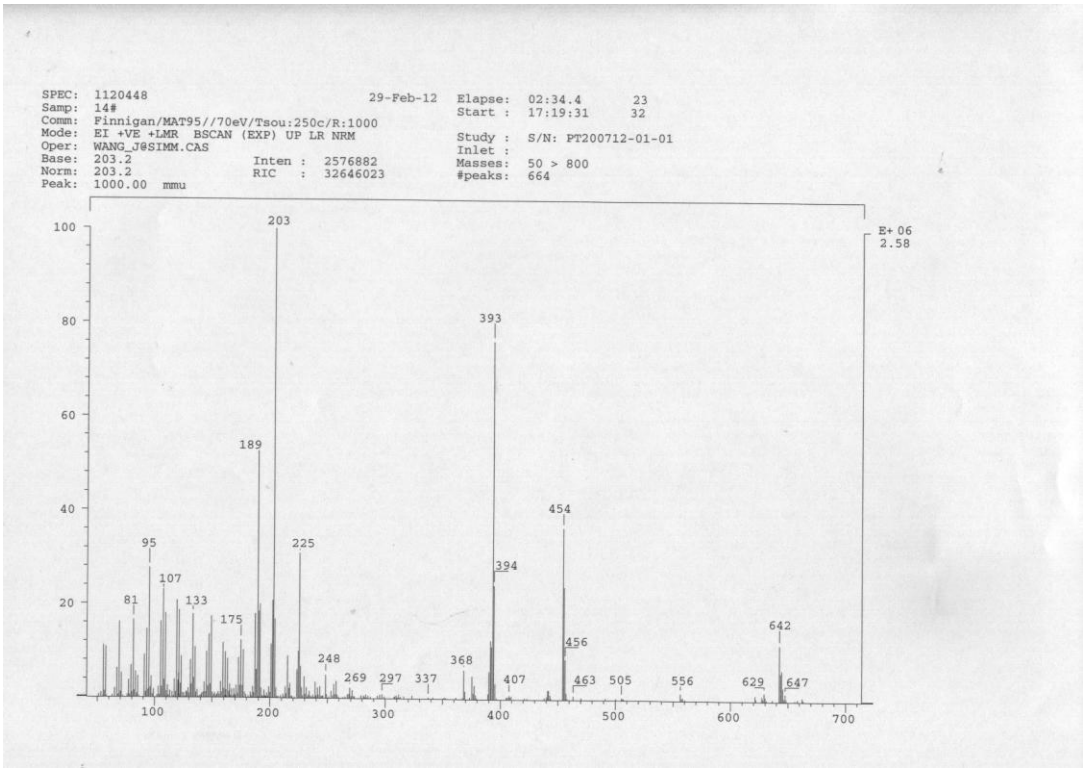

EI-MS spectrum of compound 4c

LIST: h120253-cl 20-Mar-12 Elapse: 04:38.9 43  
Samp: 14# Start: 17:25:45 45  
Comm: Finnigan/MAT95//70eV/Tsou:220c/R:10000  
Mode: EI +VE +LMR BSCAN (EXP) UP HR NRM Study: S/N: PT200712-01-01  
Oper: WANG\_J08IMM.CAS Inlet: Inlet:  
Limit: ( 0 )  
( 705 ) C45.H100.04  
Peak: 1000.00 mmu R=D: -2.0 > 60.0  
Data: CMASS : converted

| Mass     | Intensity | %A     | %RIC | Delta | R+D  | Composition |
|----------|-----------|--------|------|-------|------|-------------|
| 91.05552 | 220165    | 8.39   | 0.50 | -0.7  | 4.5  | C7.H7       |
| 93.07086 | 413833    | 15.77  | 0.94 | -0.4  | 3.5  | C7.H9       |
| 95.08839 | 787297    | 30.00  | 1.79 | -2.3  | 2.5  | C7.H11      |
| 105.0273 | 430906    | 16.42  | 0.98 |       |      |             |
| 107.0343 | 665832    | 25.37  | 1.51 | 0.1   | 0.5  | C3.H7.O4    |
| 108.0384 | 118974    | 4.53   | 0.27 |       |      |             |
| 109.0466 | 508622    | 19.38  | 1.15 |       |      |             |
| 119.0863 | 602166    | 22.95  | 1.37 | -0.2  | 4.5  | C9.H11      |
| 120.0921 | 102791    | 3.92   | 0.23 | 1.8   | 4.0  | C9.H12      |
| 121.0285 | 154365    | 5.88   | 0.35 | 0.4   | 5.3  | C7.H5.O2    |
| 121.1020 | 491371    | 18.72  | 1.12 | -0.2  | 3.5  | C9.H13      |
| 123.1173 | 201670    | 7.68   | 0.46 | 0.1   | 2.5  | C9.H15      |
| 131.0498 | 105992    | 4.04   | 0.24 | -0.1  | 6.5  | C9.H7.O     |
| 131.0859 | 206827    | 7.88   | 0.47 | 0.2   | 5.5  | C10.H11     |
| 133.1022 | 523916    | 19.96  | 1.19 | -0.5  | 4.5  | C10.H13     |
| 135.1180 | 335761    | 12.79  | 0.76 | -0.6  | 3.5  | C10.H15     |
| 145.1025 | 256445    | 9.77   | 0.58 | -0.7  | 5.5  | C11.H13     |
| 147.1174 | 356569    | 13.59  | 0.81 | -0.1  | 4.5  | C11.H15     |
| 149.1330 | 174638    | 6.65   | 0.40 | 0.0   | 3.5  | C11.H17     |
| 157.1023 | 101190    | 3.86   | 0.23 | -0.6  | 6.5  | C12.H13     |
| 159.1169 | 109263    | 11.79  | 0.70 | 0.5   | 5.5  | C12.H15     |
| 161.1326 | 233503    | 8.90   | 0.53 | 0.4   | 4.5  | C12.H17     |
| 163.1488 | 237772    | 9.06   | 0.54 | -0.1  | 3.5  | C12.H19     |
| 173.1329 | 248620    | 9.47   | 0.56 | 0.1   | 5.5  | C13.H17     |
| 175.1482 | 324380    | 12.36  | 0.74 | 0.5   | 4.5  | C13.H19     |
| 177.1634 | 320823    | 12.23  | 0.73 | 1.0   | 3.5  | C13.H21     |
| 187.1469 | 515024    | 19.63  | 1.17 | 1.7   | 5.5  | C14.H19     |
| 188.1548 | 184775    | 7.04   | 0.42 | 1.7   | 5.0  | C14.H20     |
| 189.1635 | 1248436   | 47.57  | 2.83 | 0.9   | 4.5  | C14.H21     |
| 190.1692 | 485147    | 18.49  | 1.10 | 2.9   | 4.0  | C14.H22     |
| 191.1798 | 570332    | 21.73  | 1.29 | 0.1   | 3.5  | C14.H23     |
| 201.1635 | 338251    | 12.89  | 0.77 | 0.8   | 5.5  | C15.H21     |
| 202.1726 | 571577    | 21.78  | 1.30 | -0.4  | 5.0  | C15.H22     |
| 203.1802 | 2624206   | 100.00 | 5.96 | -0.2  | 4.5  | C15.H23     |
| 204.1861 | 413477    | 15.76  | 0.94 | 1.7   | 4.0  | C15.H24     |
| 215.1795 | 285077    | 10.86  | 0.65 | 0.4   | 5.5  | C16.H23     |
| 223.0745 | 209495    | 7.98   | 0.48 | 1.5   | 10.5 | C15.H11.O2  |
| 224.0816 | 321178    | 12.24  | 0.73 | 2.1   | 10.0 | C15.H12.O2  |
| 225.0907 | 1043564   | 39.77  | 2.37 | 0.9   | 9.5  | C15.H13.O2  |
| 226.0949 | 206472    | 7.87   | 0.47 |       |      |             |
| 229.1962 | 135869    | 5.18   | 0.31 | -0.6  | 5.5  | C17.H25     |
| 257.2251 | 111861    | 4.26   | 0.25 | 1.9   | 5.5  | C19.H29     |
| 375.3035 | 114173    | 4.35   | 0.26 | 1.7   | 9.5  | C28.H39     |
| 390.3285 | 150274    | 5.73   | 0.34 | 0.2   | 9.0  | C29.H42     |
| 391.3339 | 422547    | 16.10  | 0.96 | 2.5   | 8.5  | C29.H43     |
| 392.3407 | 341274    | 13.00  | 0.77 |       |      |             |
| 393.3512 | 2012258   | 76.68  | 4.57 | 0.9   | 7.5  | C29.H45     |
| 394.3551 | 634355    | 24.17  | 1.44 |       |      |             |
| 395.3557 | 105814    | 4.03   | 0.24 |       |      |             |
| 454.2519 | 1028804   | 39.20  | 2.33 | -1.2  | 15.0 | C31.H34.O3  |
| 455.2581 | 676325    | 25.77  | 1.53 | 0.6   | 14.5 | C31.H35.O3  |
| 456.2593 | 201136    | 7.66   | 0.46 |       |      |             |
| 642.4117 | 261602    | 9.97   | 0.59 |       |      |             |
| 643.4126 | 113461    | 4.32   | 0.26 | 2.5   | 18.5 | C45.H55.O3  |
| 644.4222 | 166813    | 6.36   | 0.38 | 0.7   | 18.0 | C45.H56.O3  |

HREIMS spectrum of compound 4c

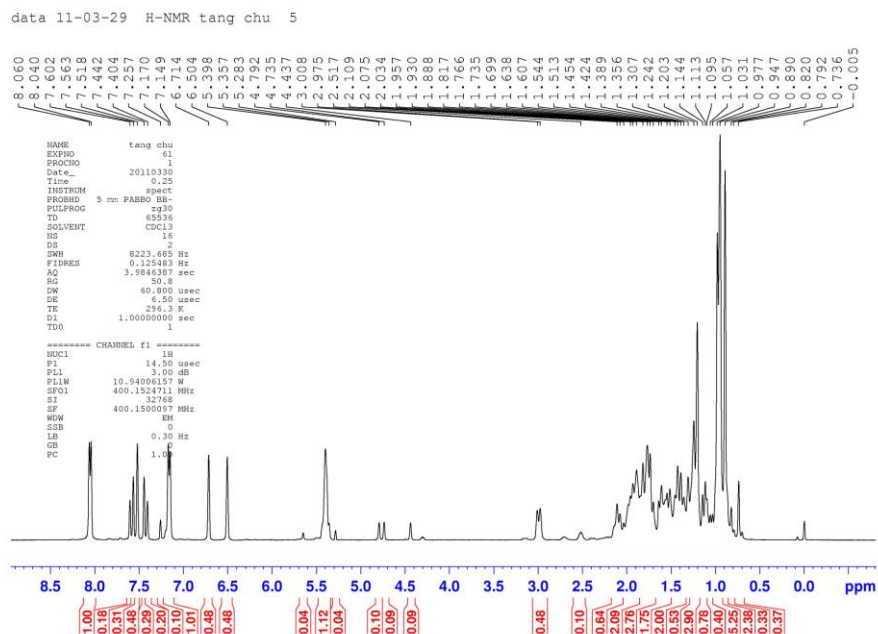

<sup>1</sup>H NMR spectrum of compound **4d**

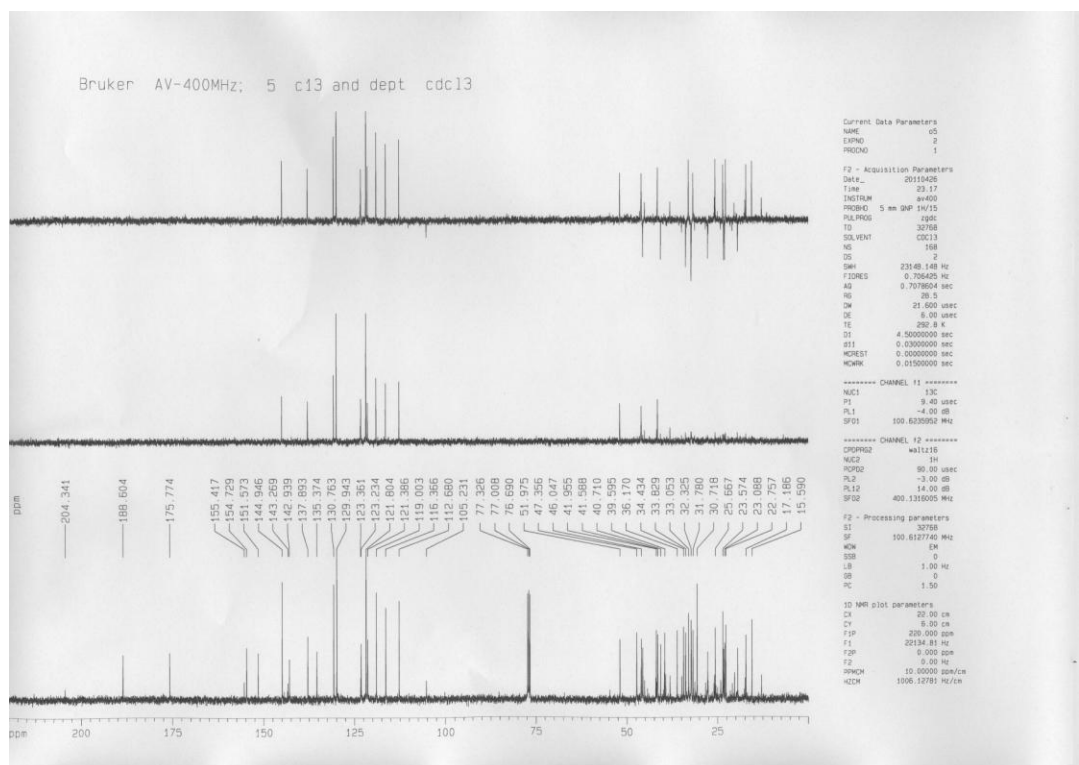

<sup>13</sup>C NMR spectrum of compound **4d**

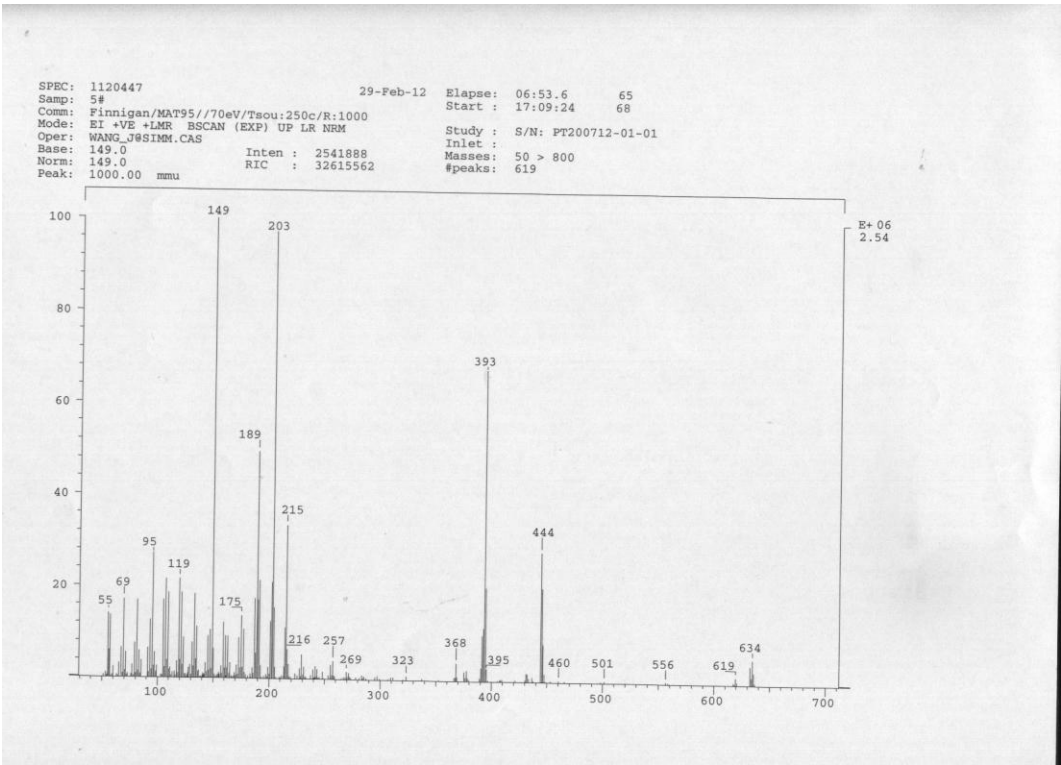

EI-MS spectrum of compound **4d**

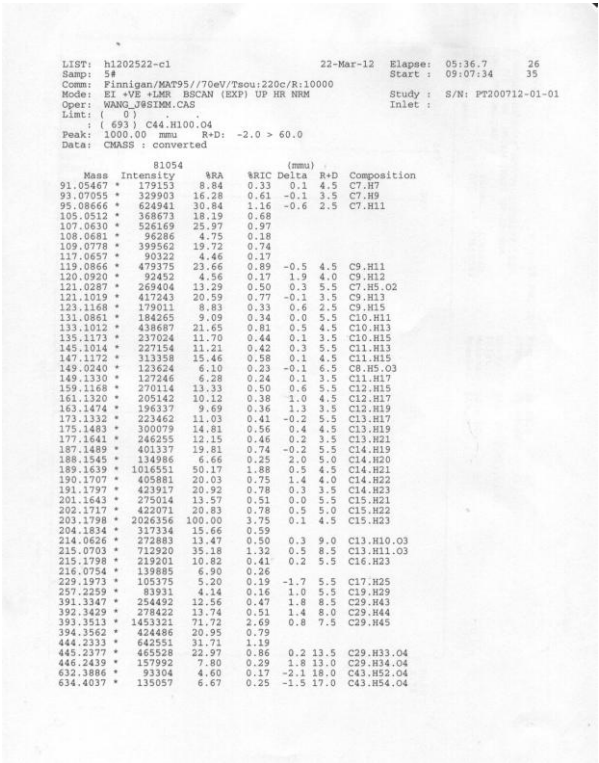

HREIMS spectrum of compound **4d**



11-05-17 H-NMR tang chu 26

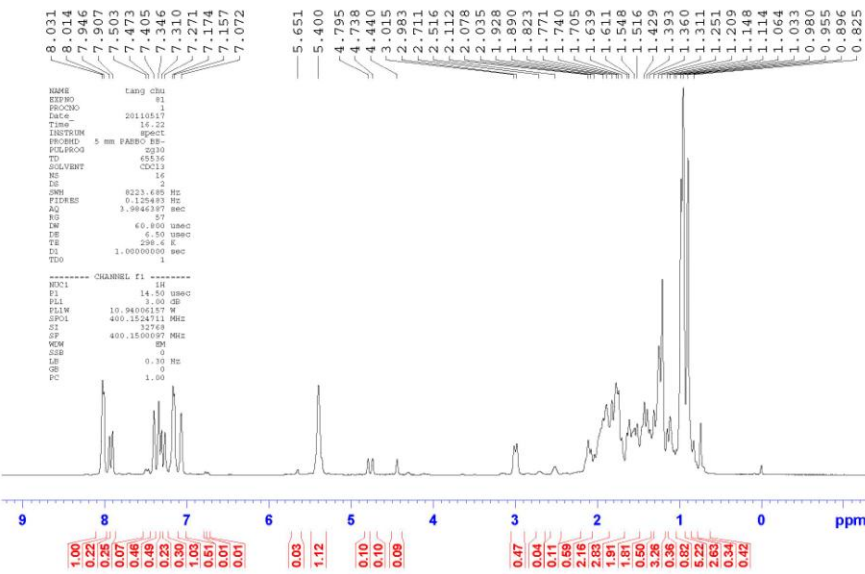

<sup>1</sup>H NMR spectrum of compound **4e**

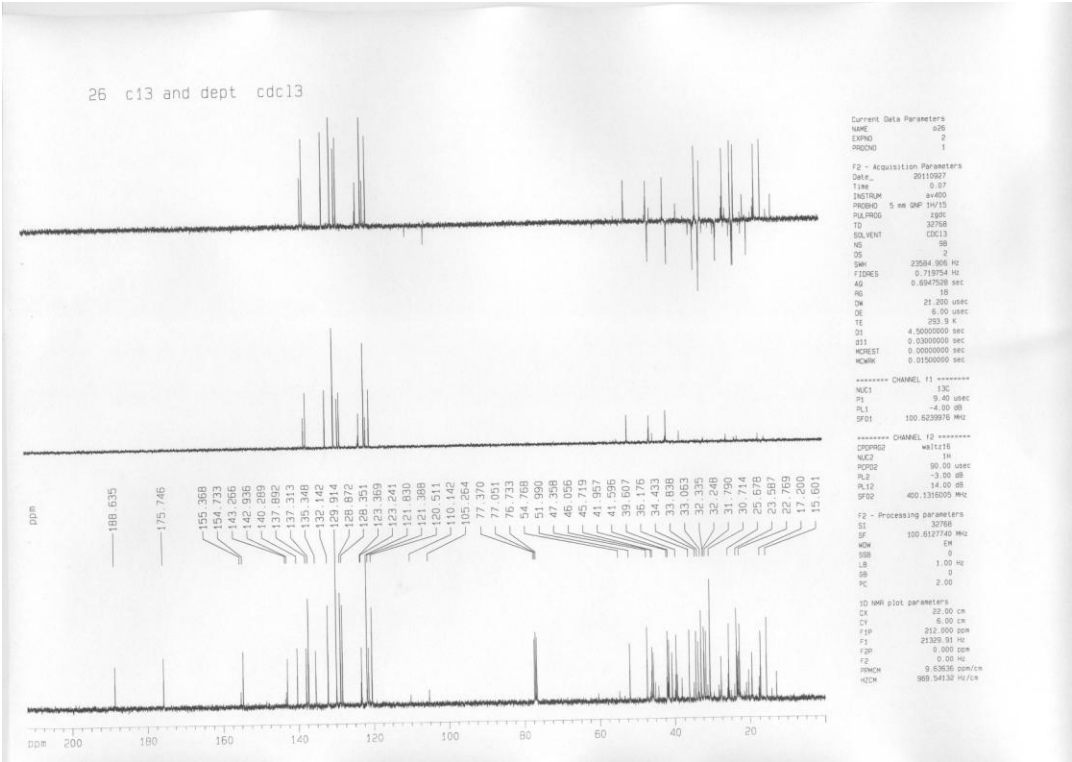

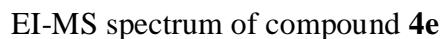

```

LIST: H120526-C1                               30-Mar-12 Elapsed: 05:22.4      50
Sample: 266                                     Start: 17:55:06      55
Mode: C1 IN/ENL/MAPS/70w/70w/220c/R10000
Operator: WANG-LEMR BSCAM (EXP) UP HR NMH
Study: 8/31/2700712-01-01
Limit: 0
: i 721) C45.H100.S-03
Peak: 1000.00 mmu R.D.
Data: CHMS3 converted -2.0 > 60.0

      222397
      -----
Mass  Intensity      WRA      WRC      Delta      R+D      Composition
105.07485      526228      16.56      1.31      -3.5      -1.5      C5.H13.0
107.09226      797790      25.11      1.71      -3.5      -1.5      C5.H13.0
109.08925      575667      18.12      1.24      -3.5      -1.5      C5.H13.0
119.08600      702645      22.12      1.01      0.4      4.5      C9.H11
121.1018      606434      19.09      1.30      -0.1      3.5      -0.5      C6.H15.S
123.1179      297516      8.09      0.55      -0.5      2.5      C9.H13
131.0885      239550      7.54      0.51      0.5      0.5      C10.H11
133.1023      629375      19.81      1.35      -0.5      4.5      C10.H13
135.1175      387335      12.19      0.83      -0.2      3.5      -2.0      C7.H17.S
135.1175      387335      12.19      0.83      -0.2      3.5      -1.0      C10.H15
145.1022      294982      9.43      0.64      -0.5      3.2      -1.5      C7.H19.S
147.1163      409921      12.90      0.88      1.1      4.5      2.0      C8.H17.S
159.1167      380755      11.98      0.82      0.7      5.5      C12.H15
161.1303      312286      9.83      0.67      -0.3      4.5      C12.H17
163.1483      275296      8.66      0.59      0.4      3.5      -0.5      C9.H21.S
173.1330      279742      8.80      0.60      0.4      3.5      C12.H19
175.1483      417568      13.14      0.90      0.4      4.5      C13.H19
177.1484      362497      11.41      0.78      0.1      3.5      C13.H21.S
187.1500      590428      18.58      1.27      -1.3      3.5      -1.5      C10.H25.S
189.1658      1510394      47.54      3.24      -1.4      4.5      C14.H21
190.1716      562152      17.69      1.21      0.5      4.0      C14.H22
191.1805      703890      22.16      1.51      -0.5      3.5      C14.H23
201.1656      429305      13.51      0.92      -1.3      5.5      C15.H22
202.1726      658007      20.71      1.41      -0.5      5.0      C15.H23
203.1806      3177110      100.00      6.82      -0.7      4.5      C15.H22
204.1850      487637      15.35      1.05      2.8      4.0      C15.H27.S
215.1974      354968      11.17      0.76      0.9      4.5      C16.H23
230.0400      417568      13.14      0.90      0.2      3.5      C16.H26.0
231.0482      1149201      36.17      2.47      -0.2      3.5      C13.H11.S-02
232.0517      271917      8.56      0.58      0.7      3.0      C16.H48.0
233.0411      410276      12.91      0.88      -0.3      3.5      C26.H47.0
392.3449      377020      11.87      0.81      -0.6      8.0      C29.H44
393.3535      2443520      76.91      5.24      -1.3      7.5      C29.H48.S
394.3558      773425      24.34      1.66      2.0      2.5      C26.H49.S
460.2808      1155959      36.38      2.48      -4.2      14.0      C29.H32.S-03
460.2808      888310      21.96      1.35      -0.9      2.5      C29.H34.S-03
462.2214      360125      11.33      0.77      1.5      13.0      C29.H34.S-03
462.2214      360125      11.33      0.77      1.5      13.0      C29.H34.S-03
500.3802      265515      8.36      0.57      -0.8      17.0      C43.H54.S-03

```

HREIMS spectrum of compound **4e**

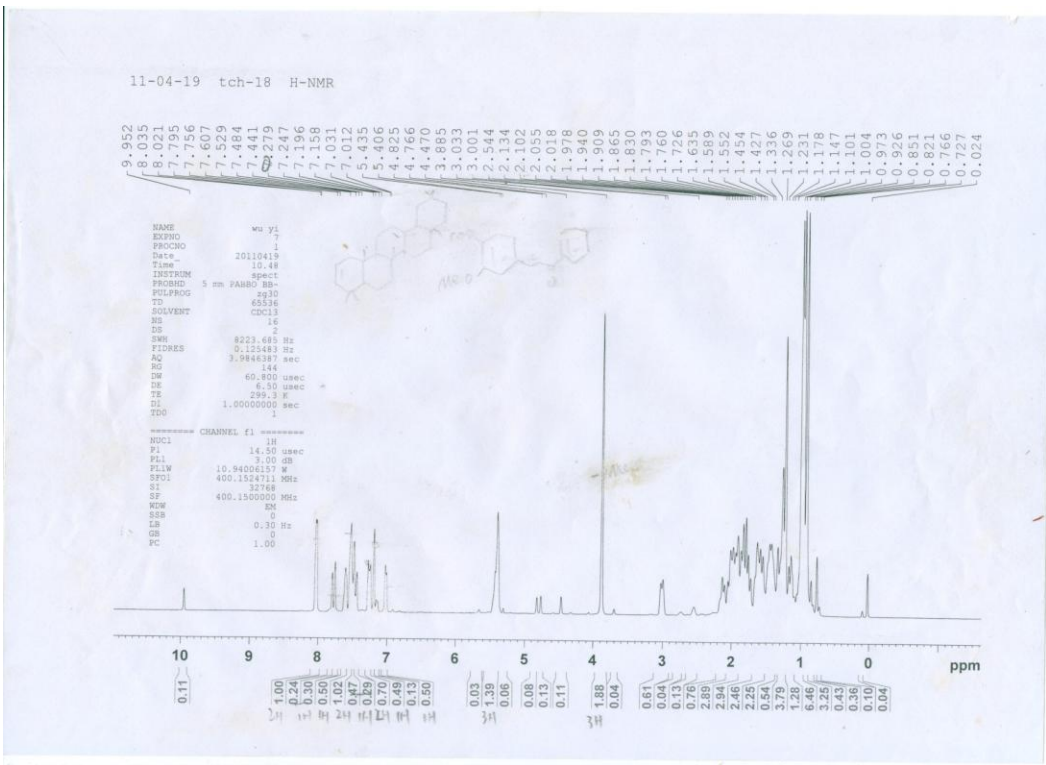

<sup>1</sup>H NMR spectrum of compound 4f

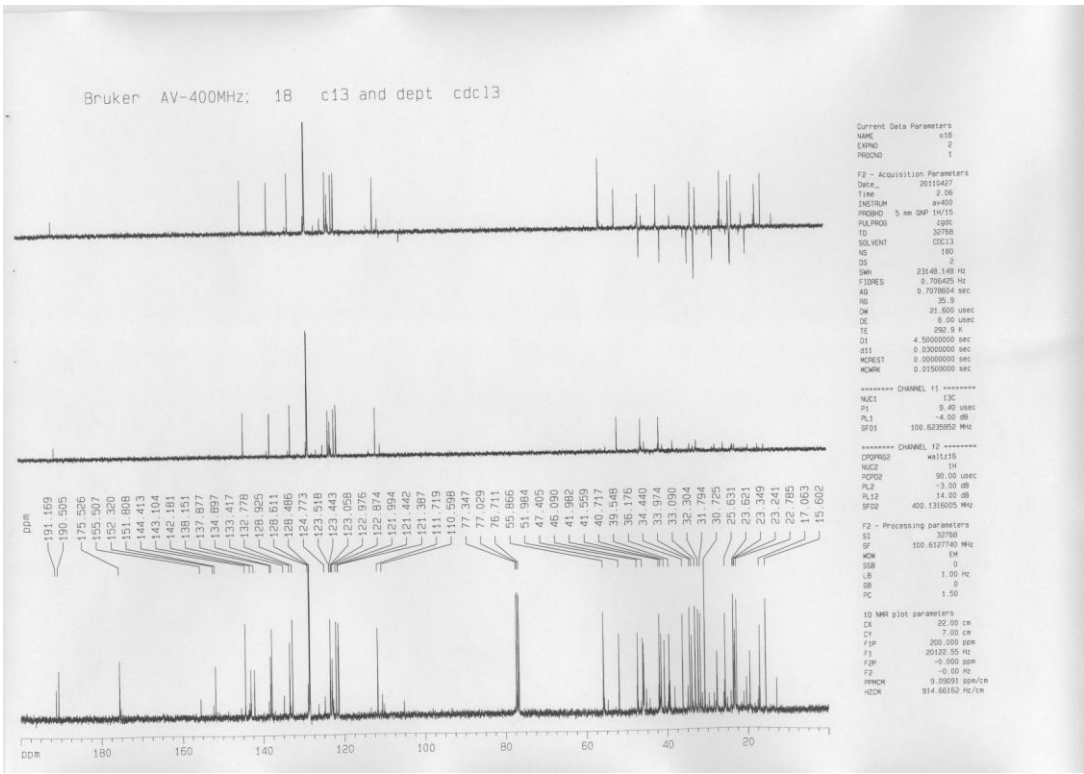

<sup>13</sup>C NMR spectrum of compound 4f

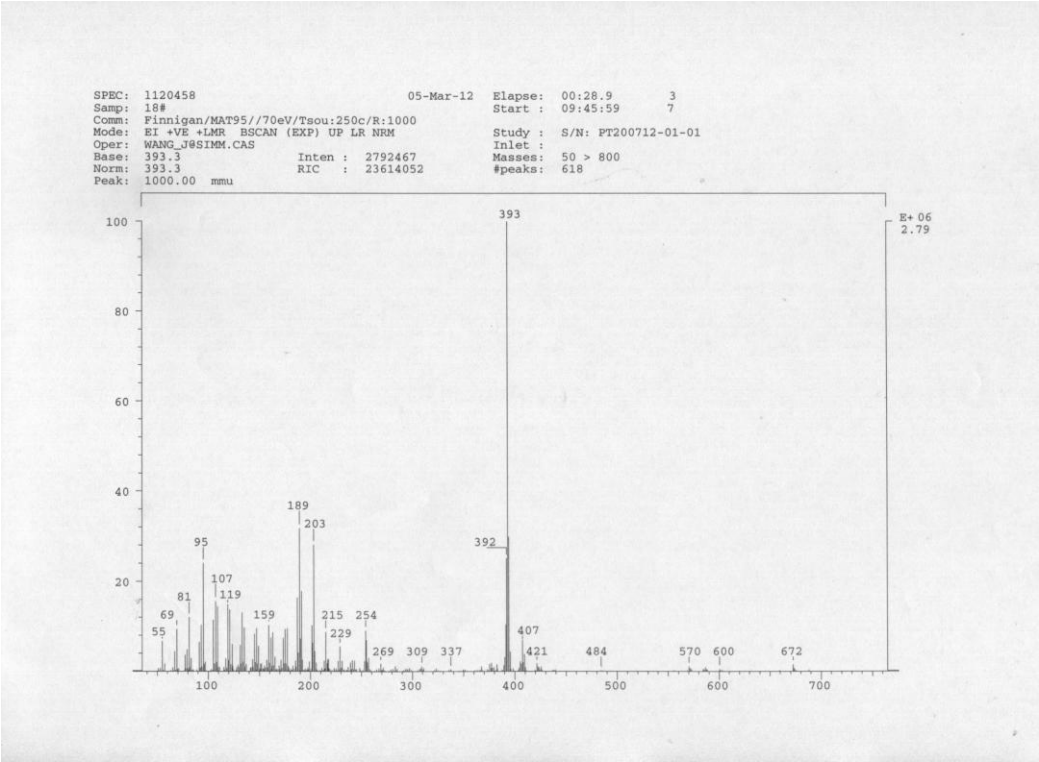

EI-MS spectrum of compound 4f

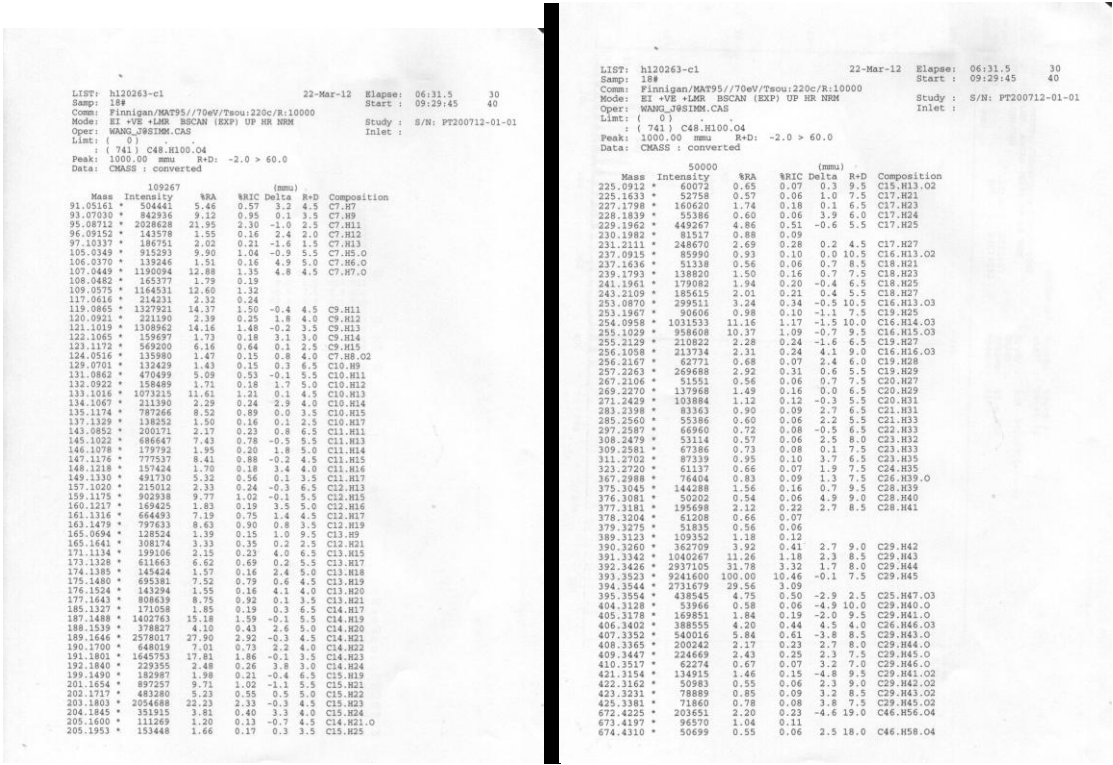

HREIMS spectrum of compound 4f



11-07-07 H-NMR tang chu 36

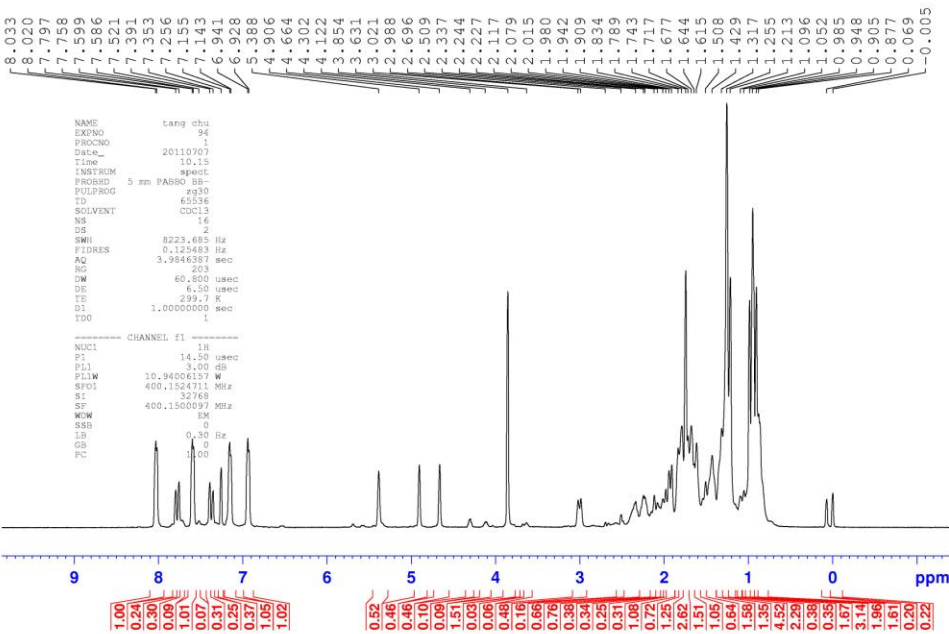

<sup>1</sup>H NMR spectrum of compound 5a

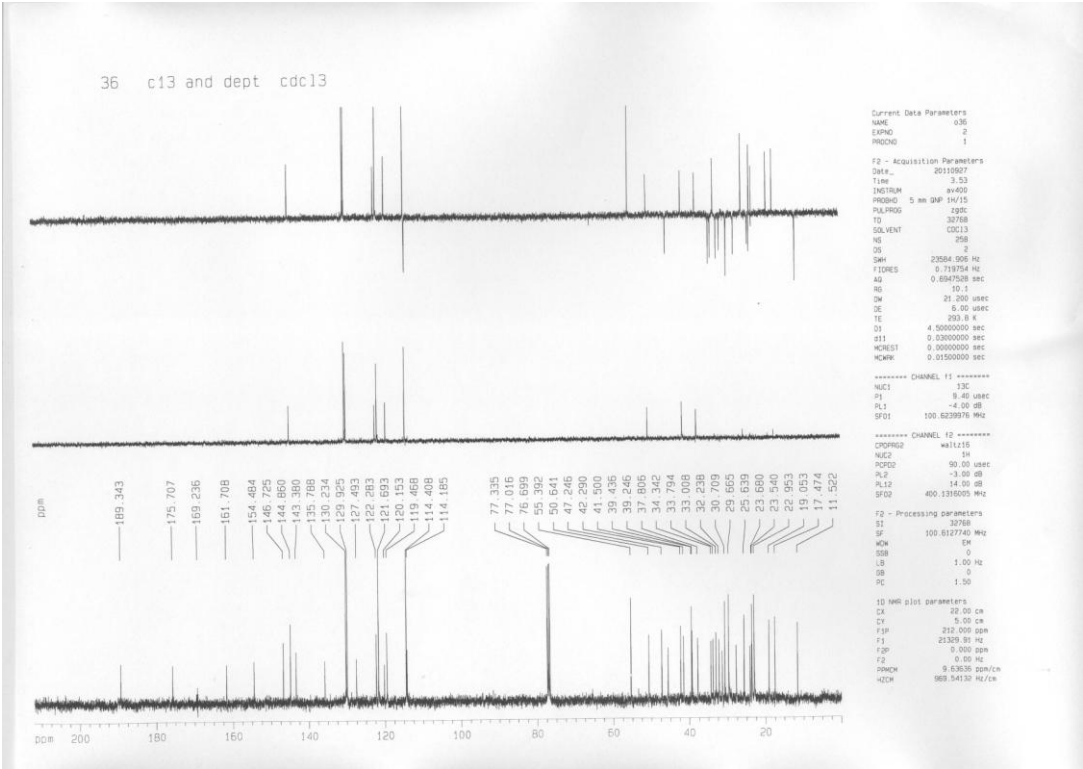

<sup>13</sup>C NMR spectrum of compound 5a

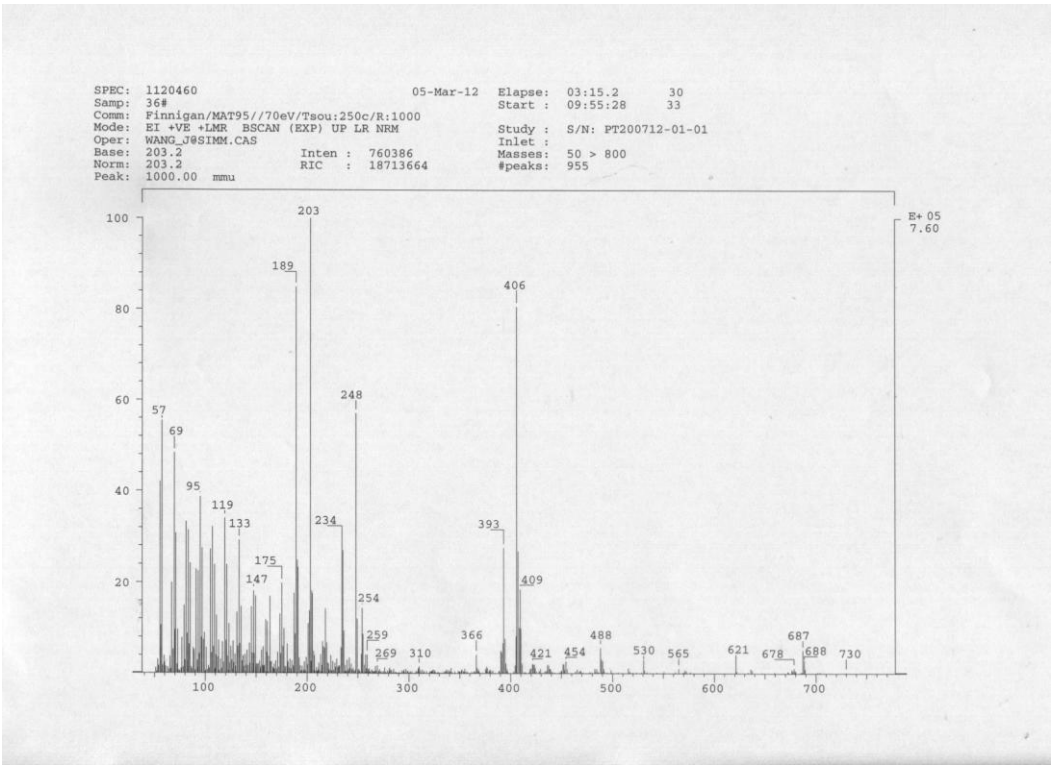

EI-MS spectrum of compound **5a**

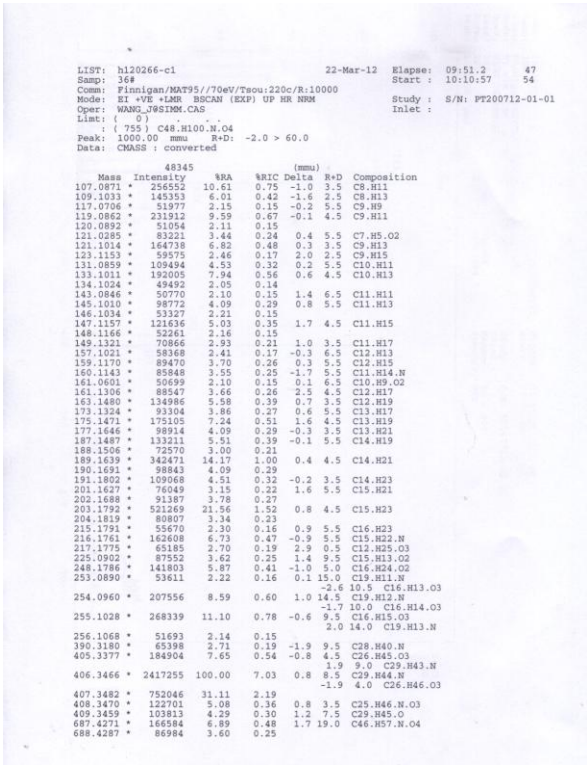

HREIMS spectrum of compound **5a**

11-11-02 H-NMR tang chu 60

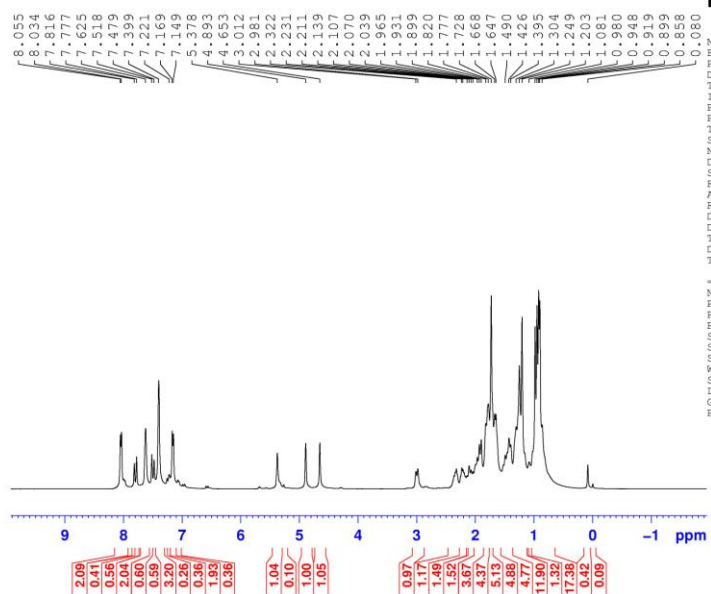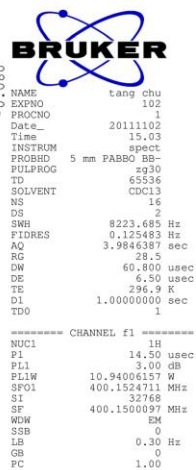

<sup>1</sup>H NMR spectrum of compound **5b**

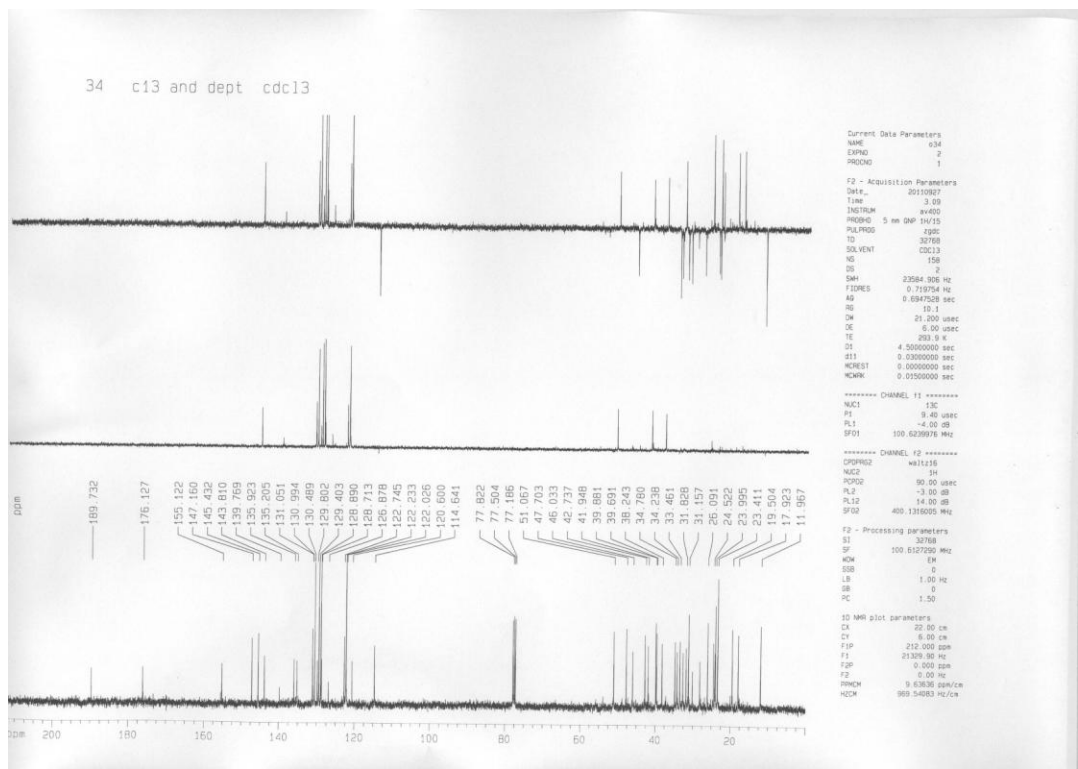

<sup>13</sup>C NMR spectrum of compound **5b**



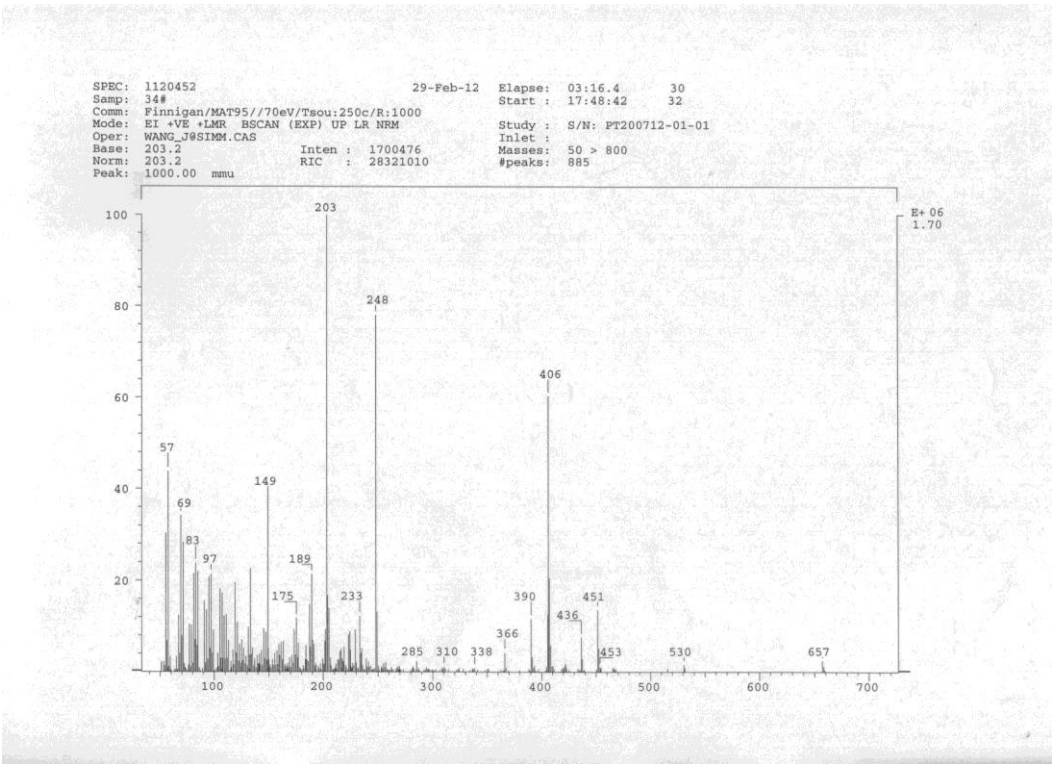

EI-MS spectrum of compound **5b**

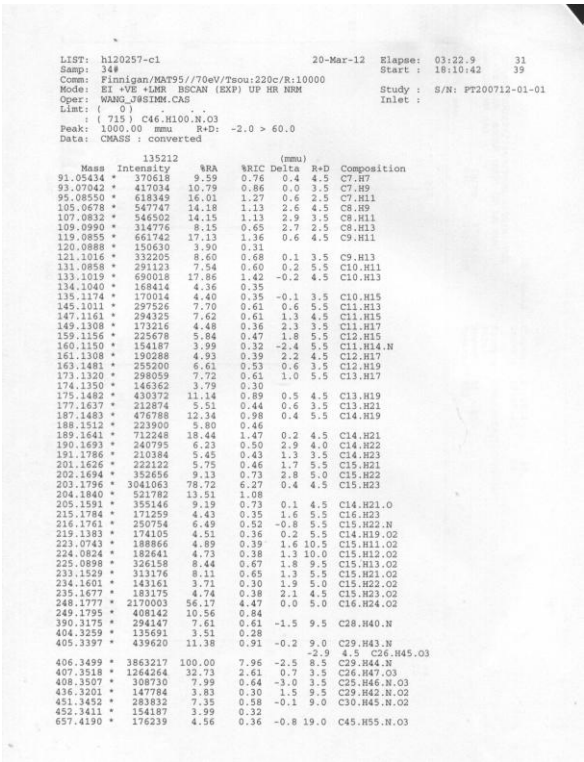

HREIMS spectrum of compound **5b**

<sup>1</sup>H NMR spectrum of compound **5c**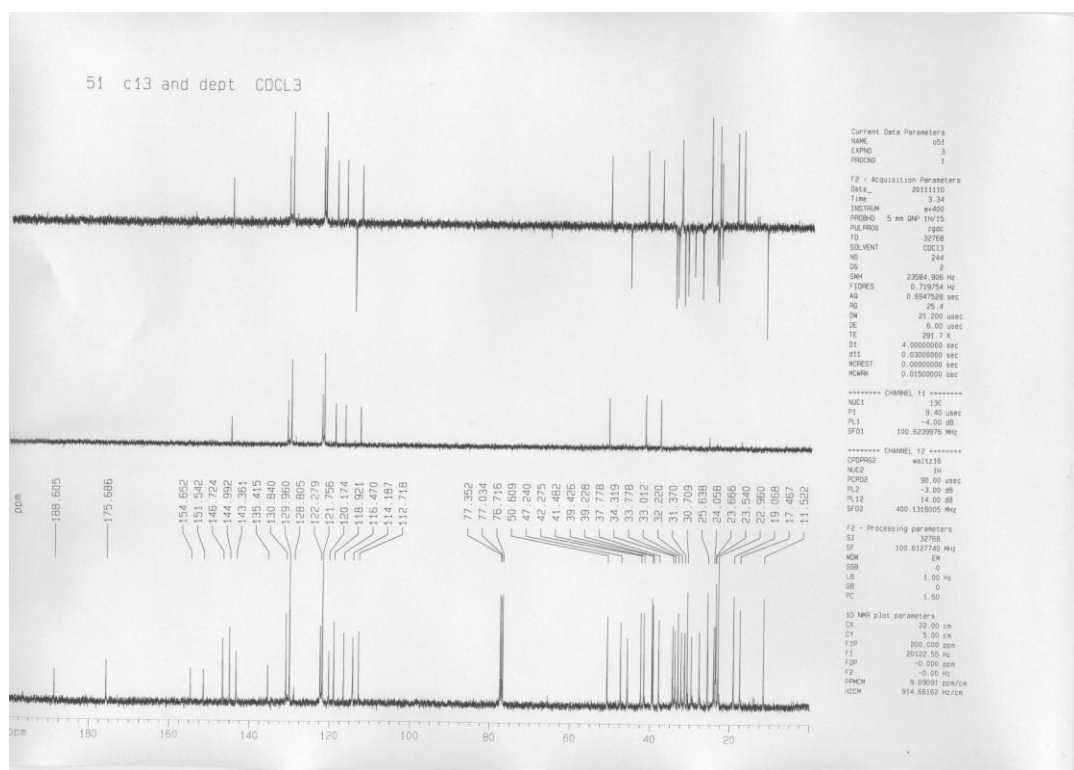 $^{13}\text{C}$  NMR spectrum of compound **5c**

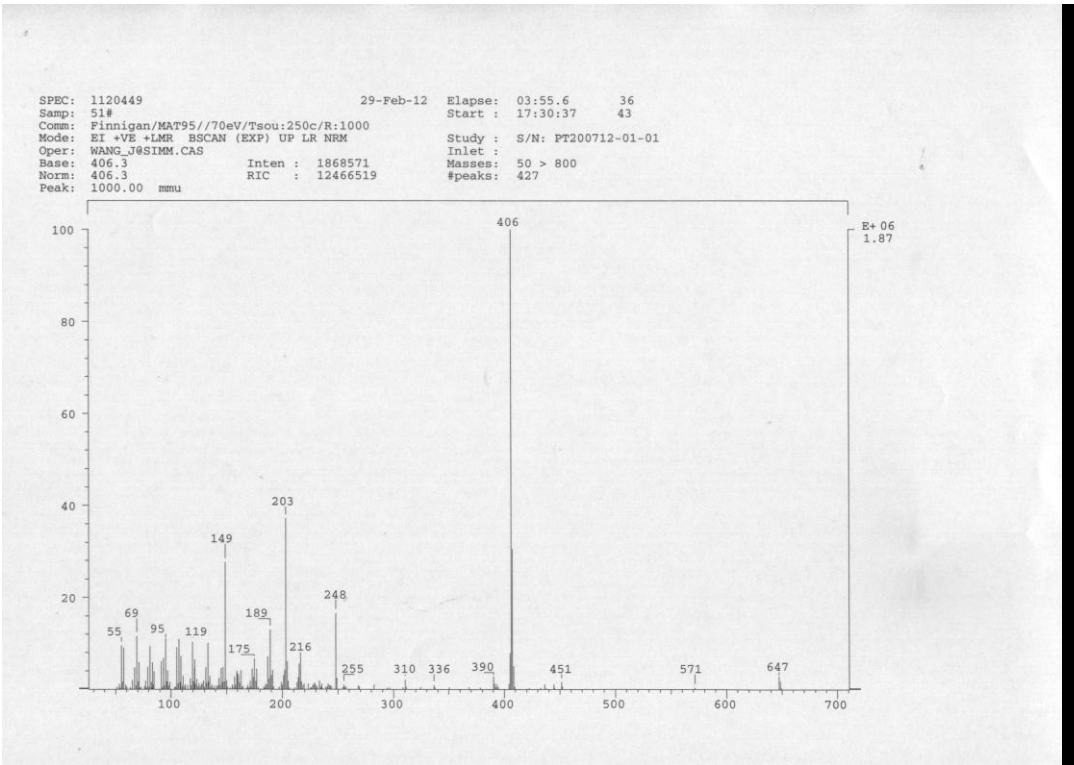

EI-MS spectrum of compound **5c**

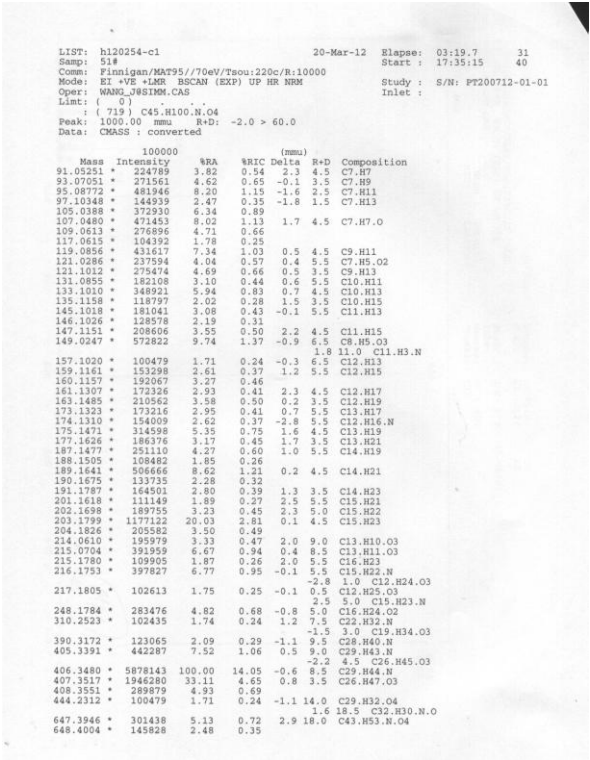

HREIMS spectrum of compound **5c**

11-05-27 H-NMR tang chu 29

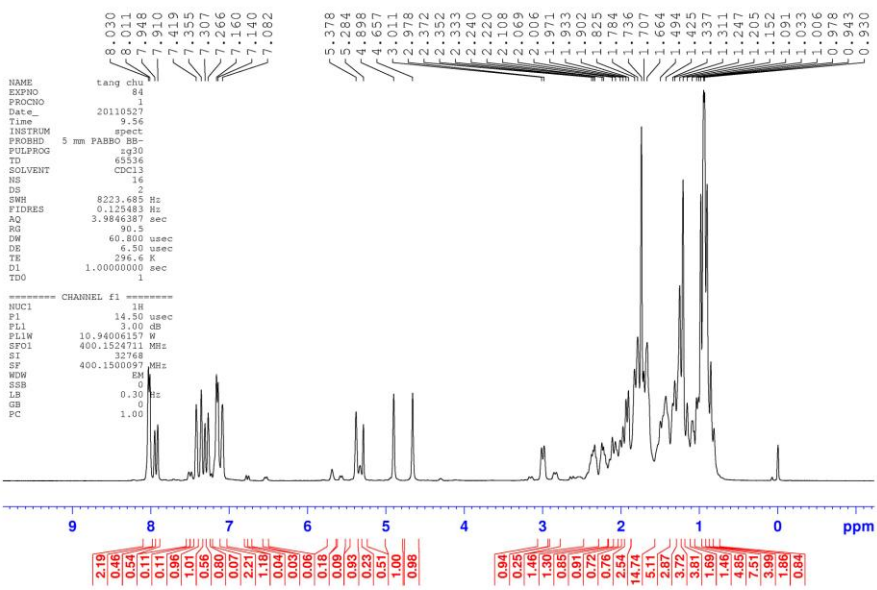

<sup>1</sup>H NMR spectrum of compound **5d**

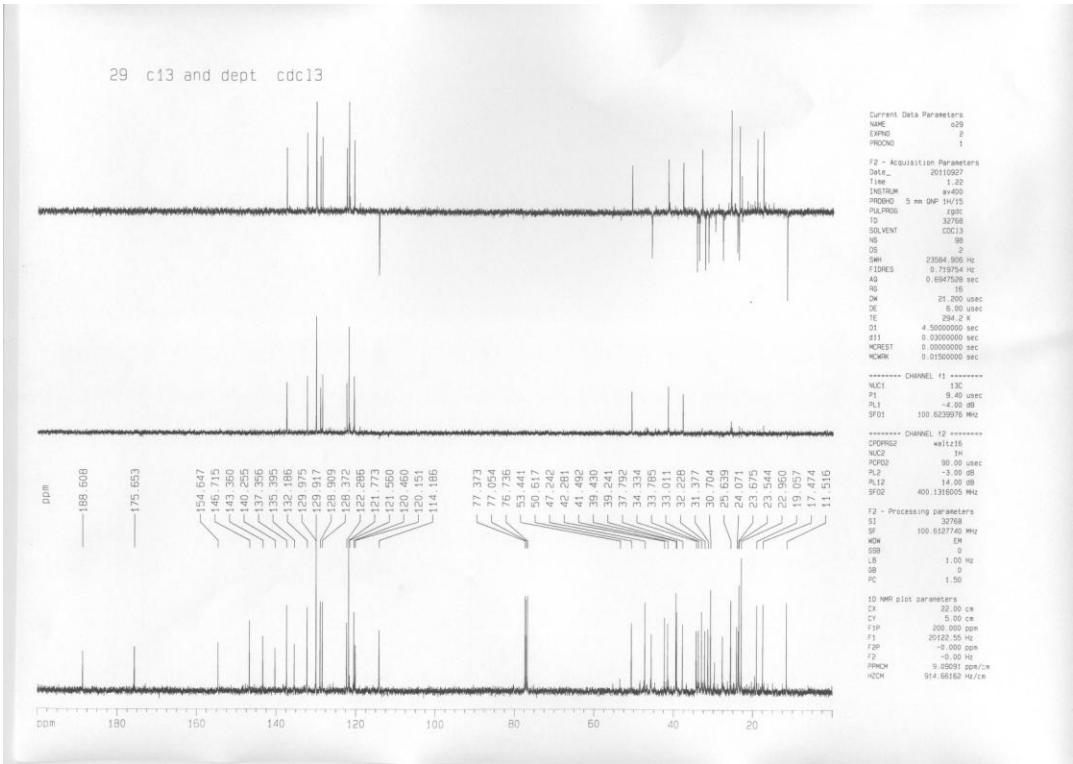

<sup>13</sup>C NMR spectrum of compound **5d**



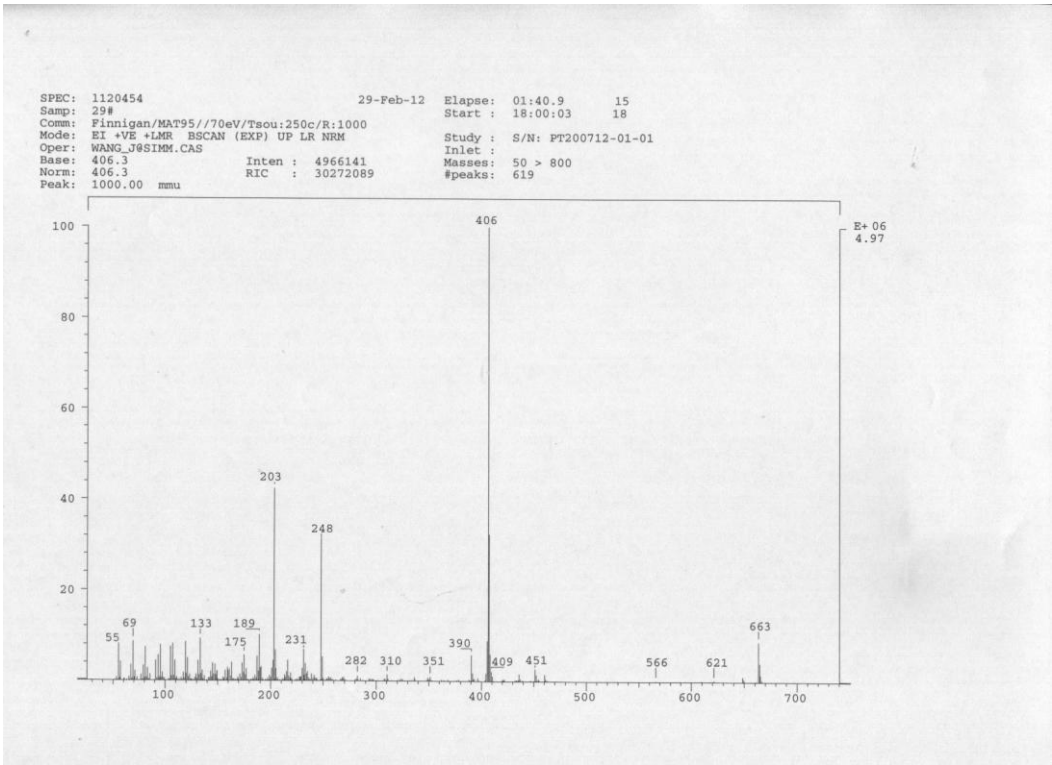

EI-MS spectrum of compound **5d**

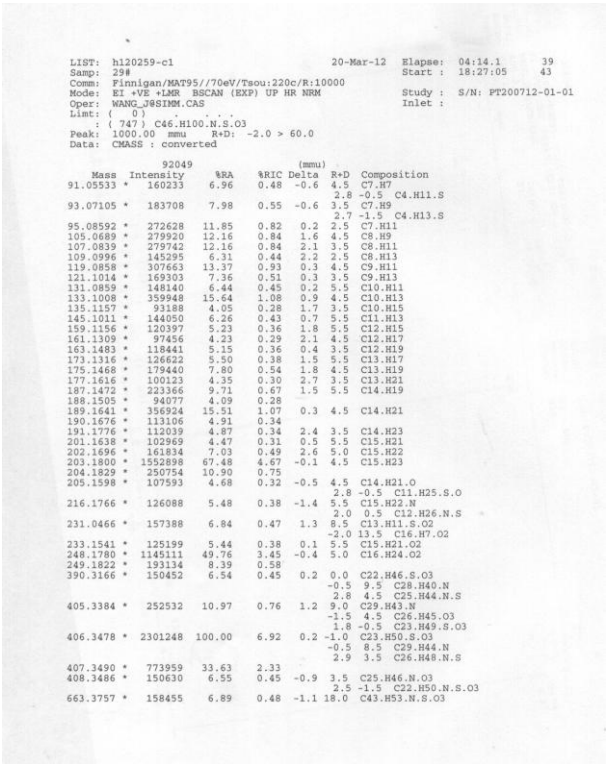

HREIMS spectrum of compound **5d**

11-11-02 H-NMR tang chu 59

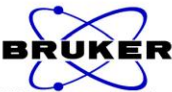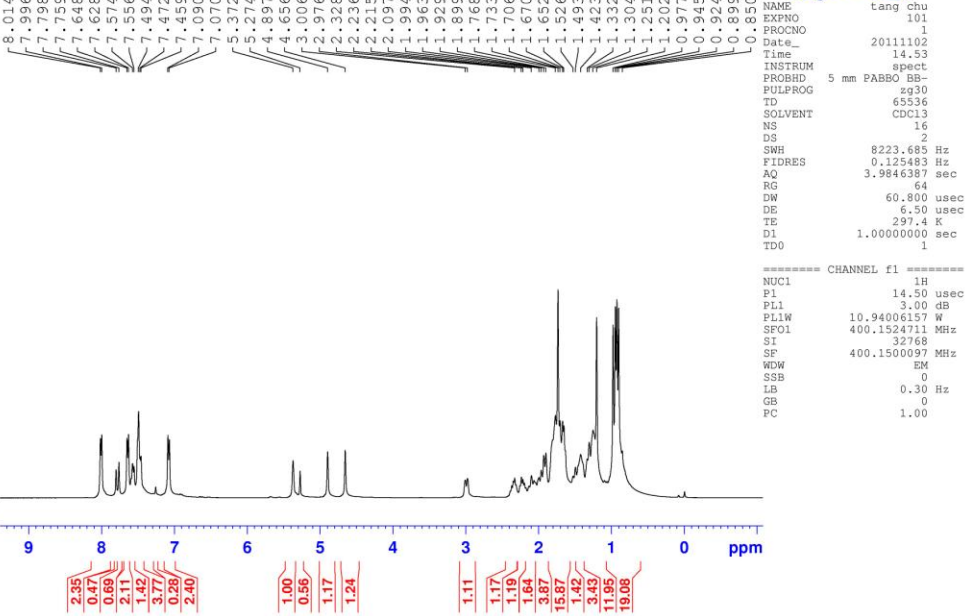

<sup>1</sup>H NMR spectrum of compound **5e**

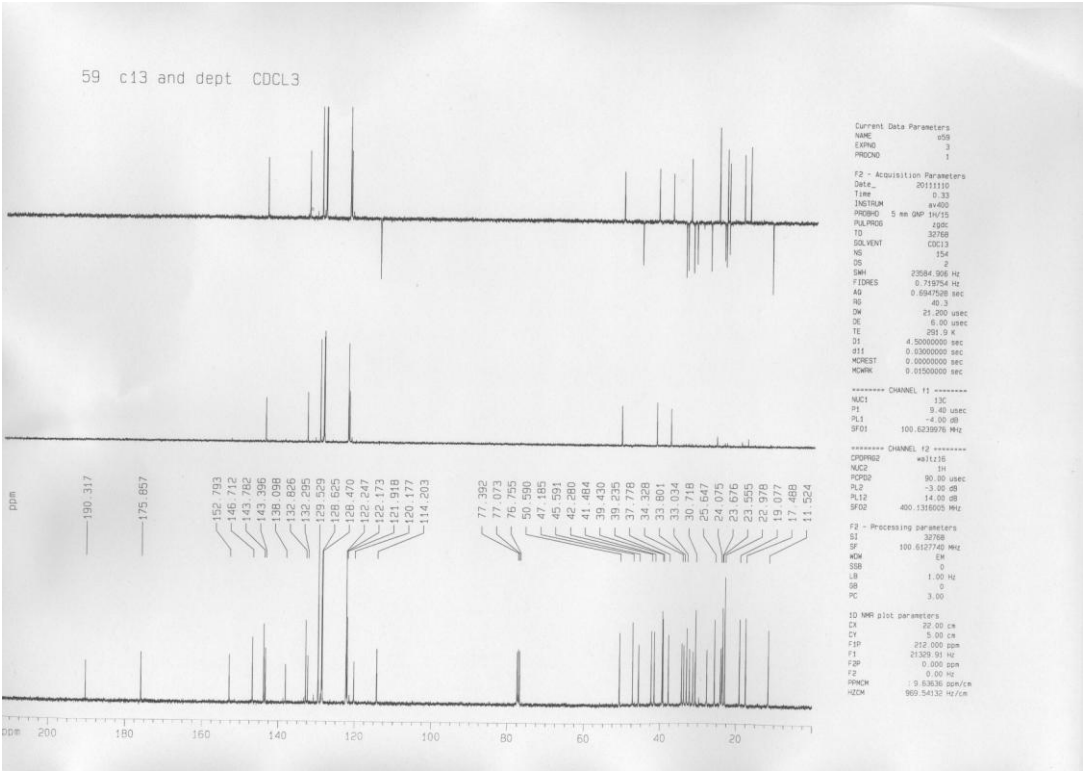

<sup>13</sup>C NMR spectrum of compound **5e**



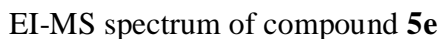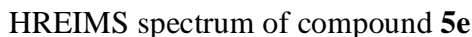

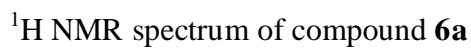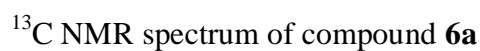

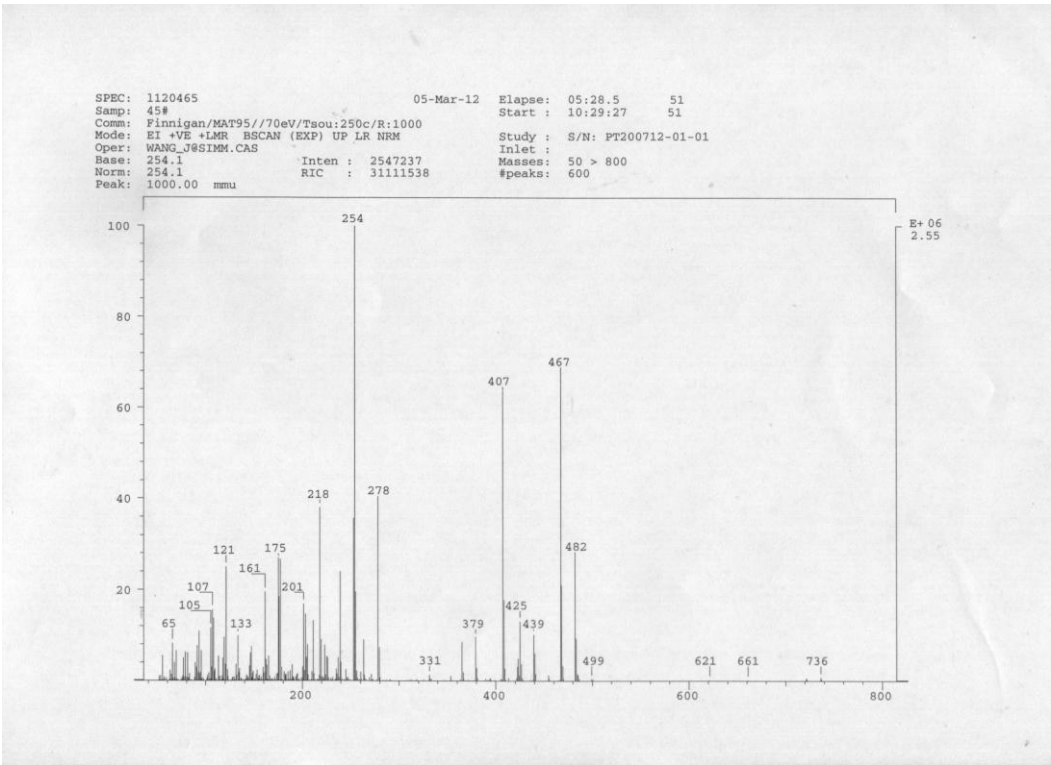

EI-MS spectrum of compound **6a**

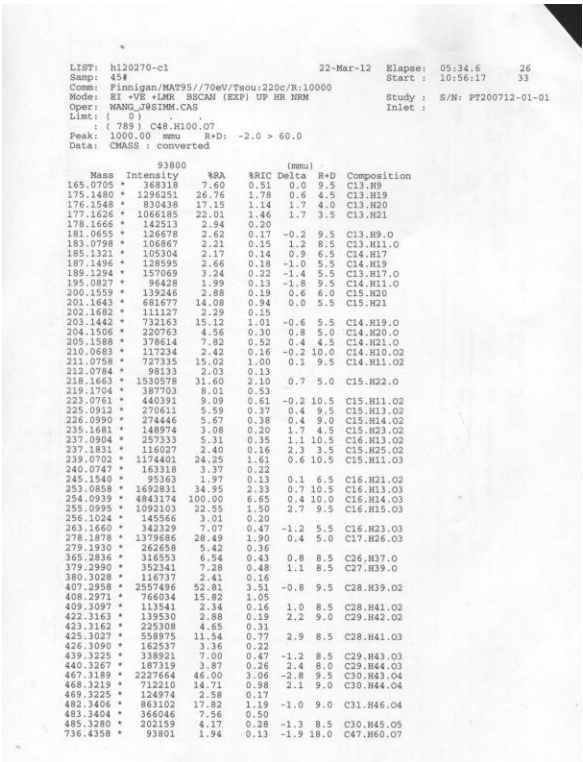

HREIMS spectrum of compound **6a**

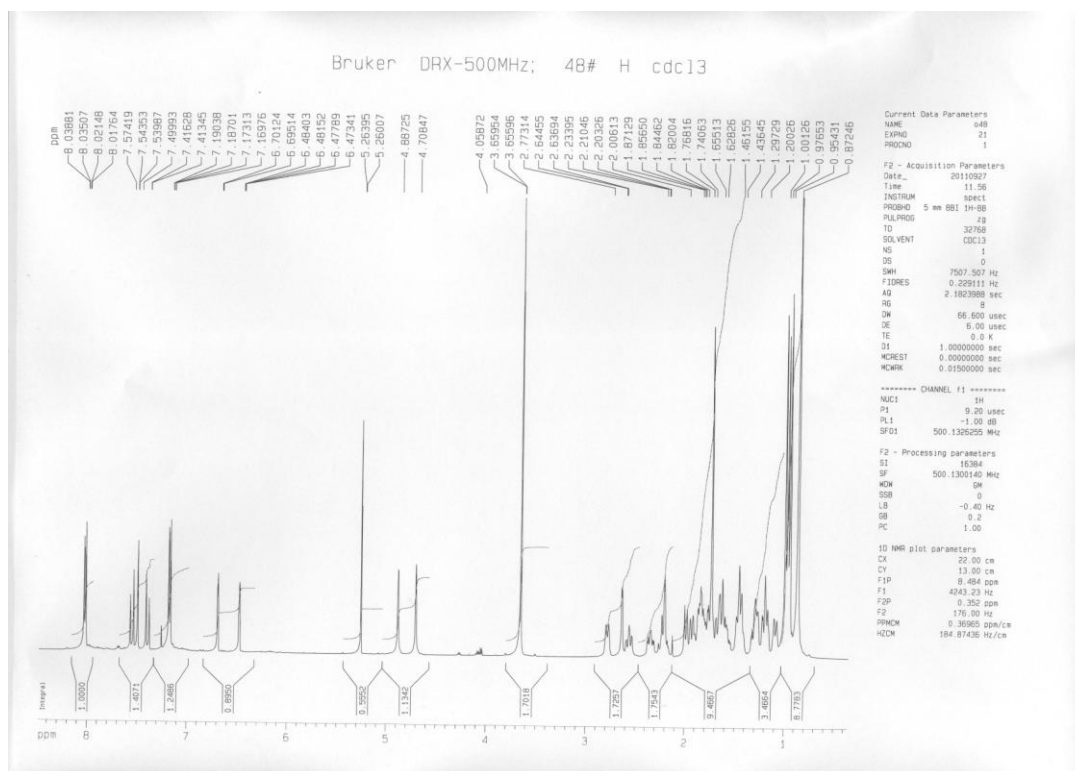

<sup>1</sup>H NMR spectrum of compound **6b**

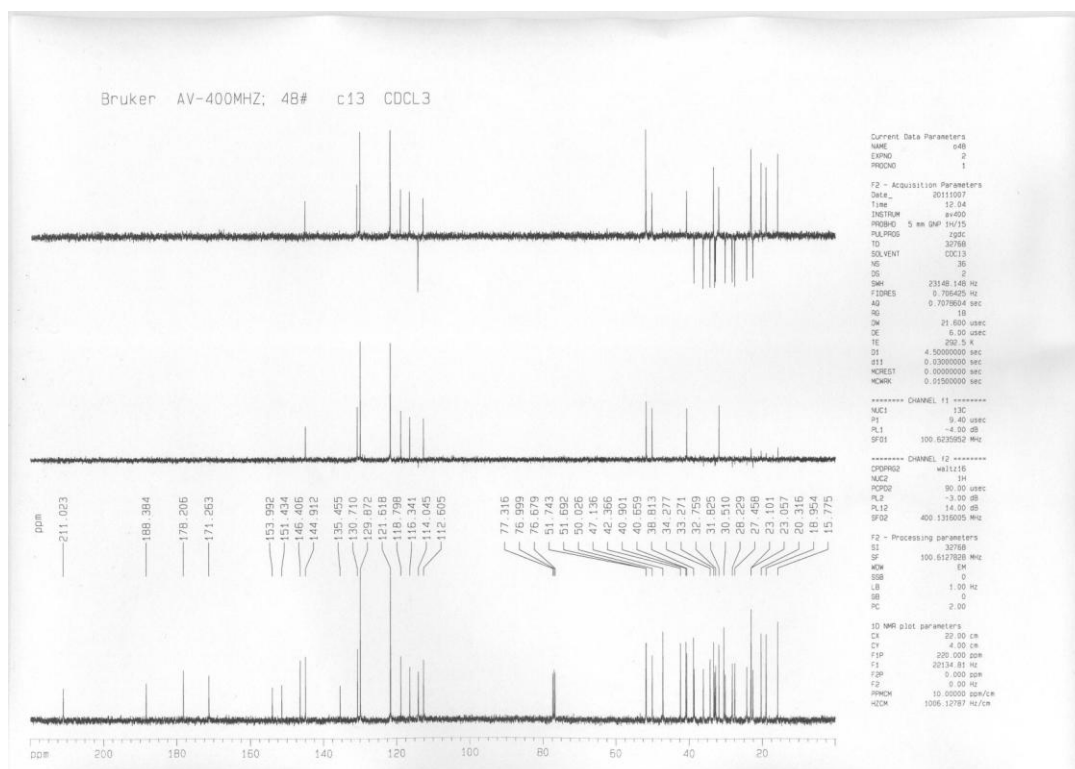

<sup>13</sup>C NMR spectrum of compound **6b**



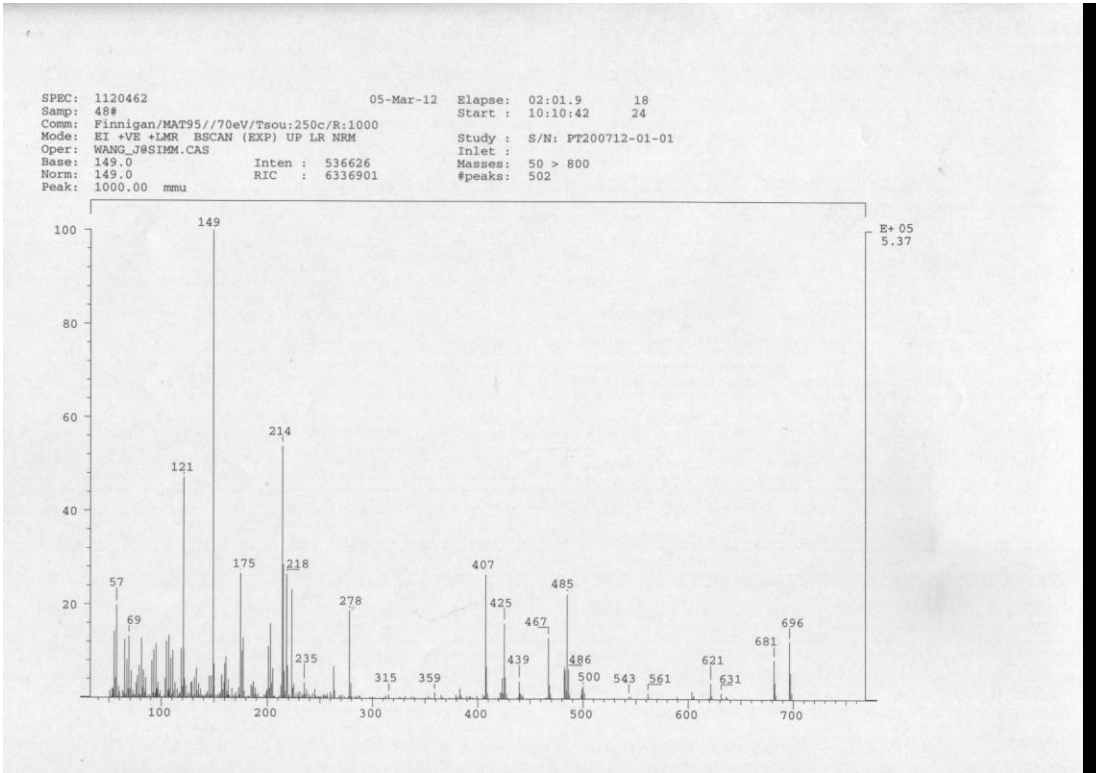

EI-MS spectrum of compound **6b**

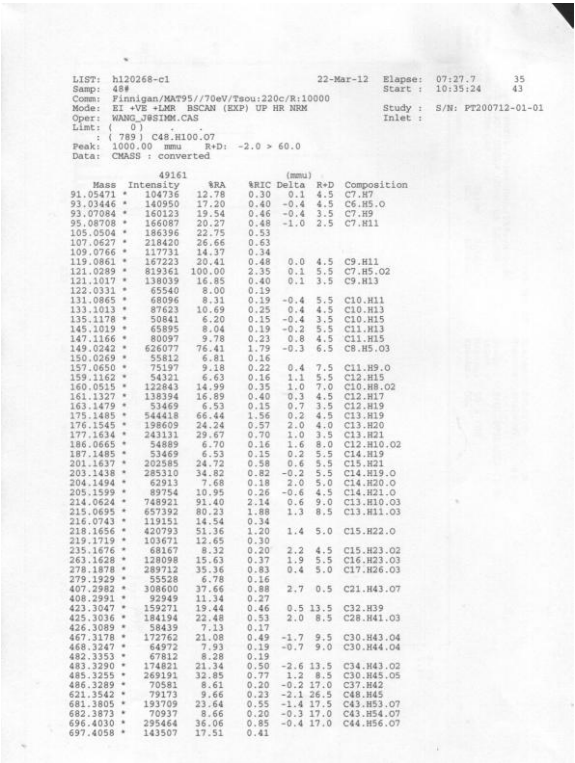

HREIMS spectrum of compound **6b**

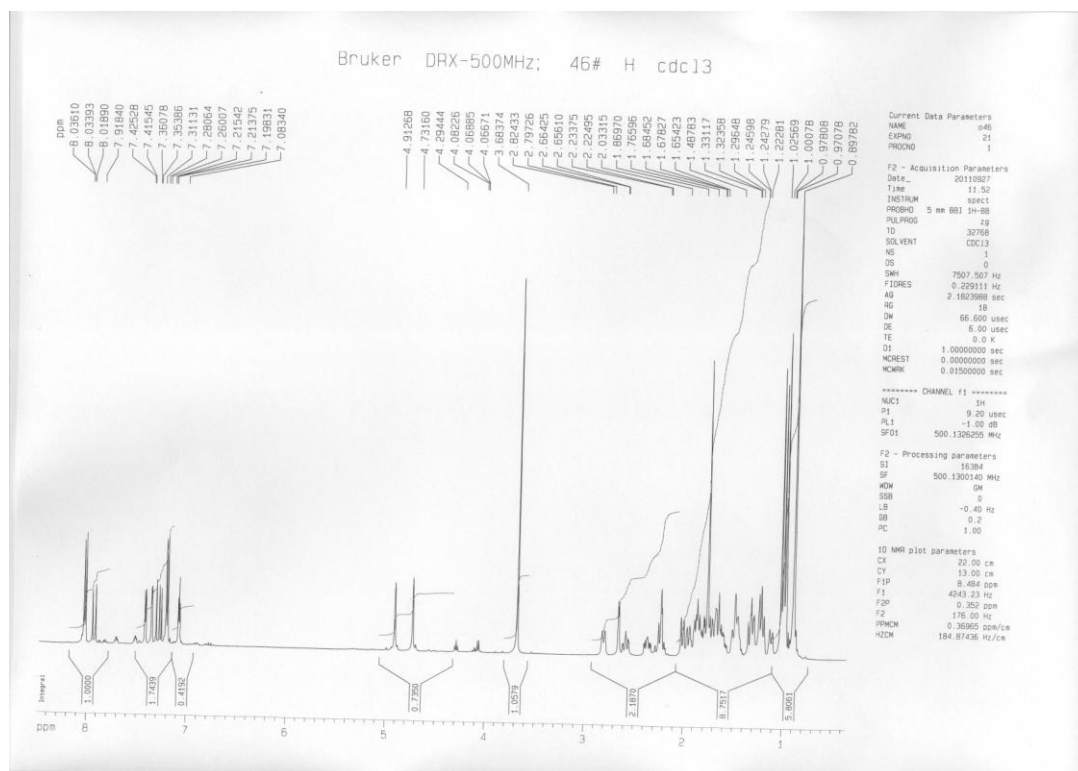

$^1\text{H}$  NMR spectrum of compound **6c**

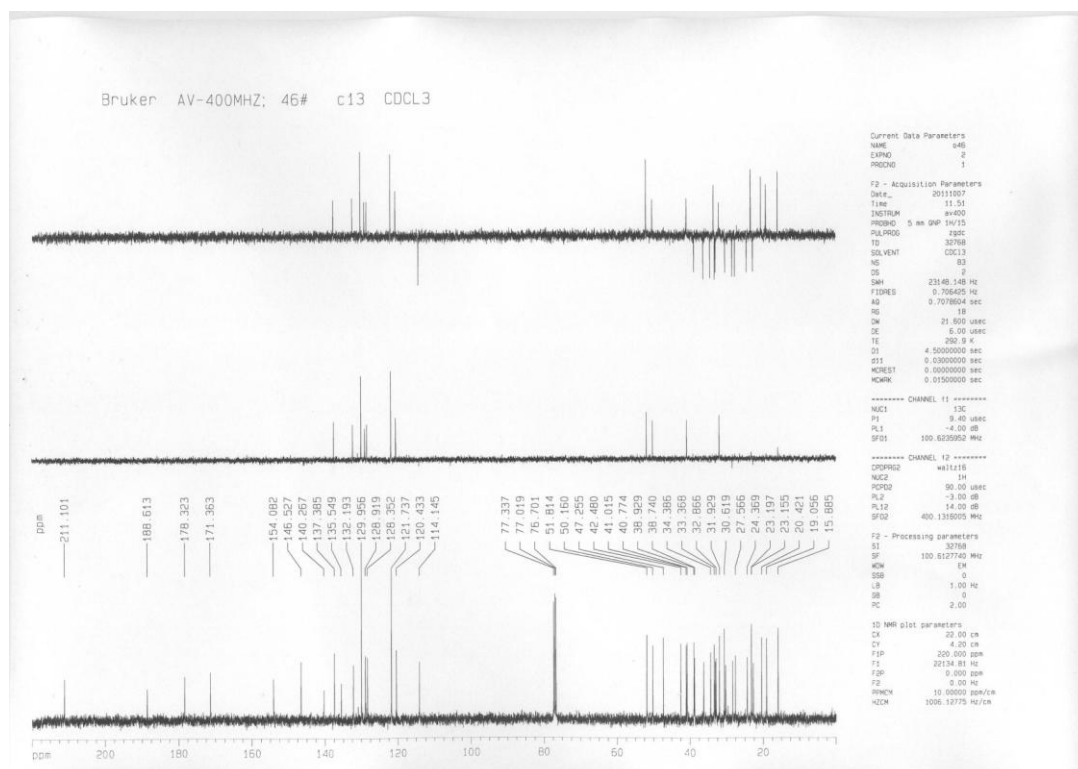

$^{13}\text{C}$  NMR spectrum of compound **6c**



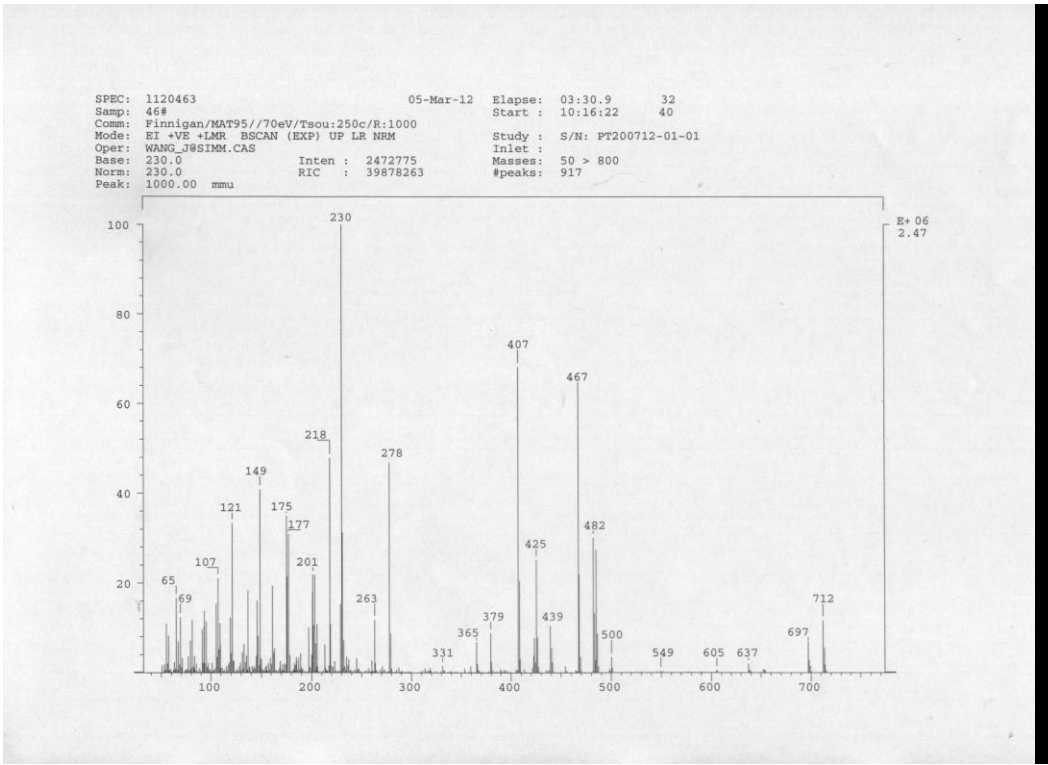

EI-MS spectrum of compound **6c**

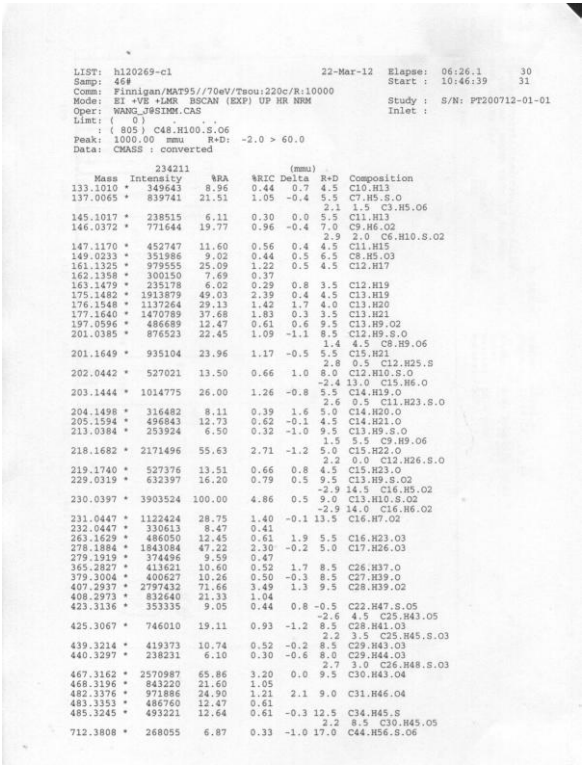

HREIMS spectrum of compound **6c**
